# Supplementary material for: Monitoring Annual Land Use/Land Cover Change in the Tucson Metropolitan Area with Google Earth Engine (1986–2020)
Source: MDPI journal article supplement (doi:10.3390/rs14092127), 2022-04-28

# Monitoring Annual Land Use/Land Cover Change in the Tucson Metropolitan Area with Google Earth Engine (1986–2020)

Fabrice Dubertret <sup>1,\*</sup>, François-Michel Le Tourneau <sup>2</sup>, Miguel L. Villarreal <sup>3</sup> and Laura M. Norman <sup>4</sup>

<sup>1</sup> International Research Laboratory on Interdisciplinary Global Environmental Studies (IRL iGLOBES), National Scientific Research Center (CNRS), University of Arizona, 845 N. Park Avenue, Marshall Building 5th Floor, Tucson, AZ 85719, USA

<sup>2</sup> National Scientific Research Center (CNRS)—Pôle de Recherche pour L'organisation et la Diffusion de L'information Géographique (PRODIG), Campus Condorcet, Bâtiment Recherche Sud, 5 Cours des Humanités, 93300 Aubervilliers, France; francois-michel.le-tourneau@cnrs.fr

<sup>3</sup> U.S. Geological Survey, Western Geographic Science Center, Moffett Field, CA 94035, USA; mvillarreal@usgs.gov

<sup>4</sup> U.S. Geological Survey, Western Geographic Science Center, Tucson, AZ 85719, USA; lnorman@usgs.gov

\* Correspondence: fabrice.dubertret@gmail.com

**Data Availability Statement:** The yearly LULC classification results, the GEE scripts and other ancillary data supporting this study are open-access; See Dubertret, F., Le Tourneau, F.M., Villarreal, M.L., and L.M. Norman. 2022. Annual (1986–2020) land-use/land cover maps of the Tucson metropolitan area, Arizona: U.S. Geological Survey data release, <https://doi.org/10.5066/P9XC5Y36> (accessed on 14 April 2022).

Table S1. Training/validation datasets composition.

| Classes                  | Training polygons       |               | Validation polygons     |               |
|--------------------------|-------------------------|---------------|-------------------------|---------------|
|                          | Number (total area)     | Sample points | Number (total area)     | Sample points |
| 11. Water                | 9 (16.1 ha)             | 210           | 14 (39.3 ha)            | 277           |
| 21. Developed. Roads     | 31 (40.9 ha)            | 277           | 30 (39.8 ha)            | 277           |
| 22. Urban. Low Density   | 127 (82.6 ha)           | 277           | 152 (85.8 ha)           | 277           |
| 23. Urban. Med. Density  | 80 (365.8 ha)           | 277           | 91 (429.9 ha)           | 277           |
| 24. Urban. High Density  | 81 (123.2 ha)           | 277           | 78 (145.8 ha)           | 277           |
| 31. Barren. Washes       | 65 (30.0 ha)            | 277           | 70 (31.0 ha)            | 277           |
| 32. Barren. Mines        | 25 (1 092.3 ha)         | 277           | 33 (1 367.7 ha)         | 277           |
| 41. Deciduous Forest     | 55 (47.0 ha)            | 277           | 48 (38.4 ha)            | 277           |
| 42. Evergreen Forest     | 63 (122.8 ha)           | 277           | 53 (93.6 ha)            | 277           |
| 43. Rocky Outcrops       | 51 (281.9 ha)           | 277           | 51 (463.4 ha)           | 277           |
| 52. Shrubs               | 18 (255.3 ha)           | 277           | 13 (165.7 ha)           | 277           |
| 53. Shrubs. Dark         | 136 (1 897.4 ha)        | 277           | 125 (1 378.0 ha)        | 277           |
| 54. Shrubs. Bright       | 45 (397.5 ha)           | 277           | 40 (316.4 ha)           | 277           |
| 71. Grassland            | 58 (192.3 ha)           | 277           | 56 (96.2 ha)            | 277           |
| 81. Pasture and Parks    | 39 (344.5 ha)           | 277           | 38 (271.6 ha)           | 277           |
| 82. Cultivated Crops     | 30 (17.6 ha)            | 232           | 30 (19.1 ha)            | 251           |
| 83. Nut-Tree Plantations | 8 (128.9 ha)            | 277           | 6 (75.3 ha)             | 277           |
| 91. Riparian Forest      | 34 (36.2 ha)            | 277           | 40 (49.5 ha)            | 277           |
| <b>TOTAL</b>             | <b>955 (5 472.5 ha)</b> | <b>4874</b>   | <b>968 (5 106.7 ha)</b> | <b>4960</b>   |

**Table S2.** Confusion matrix of yearly land cover validations. UA= user's accuracies; PA=producer's accuracies; OA = Overall accuracies; Kappa = Kappa coefficients. Note: 2012 was not treated due to a lack of good quality data because of Landsat 7 issues and the delayed launch of Landsat 8 from July 2011 to February 2013.

| 1986                    |     | OA = 86.7% |      |      |      |      |      |      |      | Kappa = 0.854 |      |      |      |      |      |
|-------------------------|-----|------------|------|------|------|------|------|------|------|---------------|------|------|------|------|------|
| Classes                 | 11  | 21         | 22   | 23   | 24   | 31   | 32   | 41   | 42   | 52            | 71   | 81   | 82   | 91   | PA   |
| 11. Water               | 277 | 0          | 0    | 0    | 0    | 0    | 0    | 0    | 0    | 0             | 0    | 0    | 0    | 0    | 1.00 |
| 21. Developed. Roads    | 0   | 273        | 0    | 0    | 0    | 0    | 4    | 0    | 0    | 0             | 0    | 0    | 0    | 0    | 0.99 |
| 22. Urban. Low Density  | 0   | 0          | 231  | 8    | 0    | 2    | 0    | 8    | 0    | 28            | 0    | 0    | 0    | 0    | 0.83 |
| 23. Urban. Med. Density | 0   | 0          | 20   | 213  | 7    | 0    | 7    | 1    | 0    | 29            | 0    | 0    | 0    | 0    | 0.77 |
| 24. Urban. High Density | 5   | 0          | 10   | 11   | 198  | 2    | 39   | 0    | 0    | 10            | 0    | 2    | 0    | 0    | 0.71 |
| 31. Barren. Washes      | 0   | 0          | 0    | 0    | 0    | 233  | 0    | 25   | 0    | 2             | 0    | 0    | 0    | 17   | 0.84 |
| 32. Barren. Mines       | 1   | 0          | 0    | 0    | 0    | 5    | 211  | 1    | 1    | 58            | 0    | 0    | 0    | 0    | 0.76 |
| 41. Deciduous Forest    | 0   | 0          | 0    | 0    | 0    | 6    | 0    | 227  | 0    | 4             | 22   | 3    | 1    | 14   | 0.82 |
| 42. Evergreen Forest    | 0   | 0          | 0    | 0    | 0    | 2    | 0    | 23   | 528  | 1             | 0    | 0    | 0    | 0    | 0.95 |
| 52. Shrubs              | 0   | 0          | 0    | 0    | 0    | 4    | 2    | 12   | 7    | 785           | 20   | 0    | 1    | 0    | 0.94 |
| 71. Grassland           | 0   | 0          | 0    | 0    | 0    | 0    | 0    | 23   | 0    | 15            | 232  | 0    | 7    | 0    | 0.84 |
| 81. Pasture and Parks   | 2   | 0          | 1    | 0    | 0    | 2    | 45   | 0    | 0    | 20            | 0    | 181  | 0    | 0    | 0.72 |
| 82. Cultivated Crops    | 0   | 0          | 0    | 0    | 0    | 3    | 0    | 8    | 8    | 26            | 0    | 10   | 497  | 2    | 0.90 |
| 91. Riparian Forest     | 0   | 0          | 0    | 0    | 0    | 8    | 0    | 45   | 2    | 2             | 0    | 0    | 2    | 218  | 0.79 |
| UA                      |     | 0.97       | 1.00 | 0.88 | 0.92 | 0.97 | 0.87 | 0.69 | 0.61 | 0.97          | 0.80 | 0.85 | 0.92 | 0.98 | 0.87 |

| 1987                    |     | OA = 89.2% |      |      |      |      |      |      |      | Kappa = 0.881 |      |      |      |      |      |
|-------------------------|-----|------------|------|------|------|------|------|------|------|---------------|------|------|------|------|------|
| Classes                 | 11  | 21         | 22   | 23   | 24   | 31   | 32   | 41   | 42   | 52            | 71   | 81   | 82   | 91   | PA   |
| 11. Water               | 277 | 0          | 0    | 0    | 0    | 0    | 0    | 0    | 0    | 0             | 0    | 0    | 0    | 0    | 1.00 |
| 21. Developed. Roads    | 0   | 274        | 0    | 0    | 0    | 0    | 3    | 0    | 0    | 0             | 0    | 0    | 0    | 0    | 0.99 |
| 22. Urban. Low Density  | 0   | 0          | 237  | 6    | 0    | 2    | 0    | 8    | 0    | 24            | 0    | 0    | 0    | 0    | 0.86 |
| 23. Urban. Med. Density | 0   | 0          | 20   | 214  | 6    | 0    | 7    | 1    | 0    | 29            | 0    | 0    | 0    | 0    | 0.77 |
| 24. Urban. High Density | 5   | 0          | 8    | 10   | 204  | 2    | 37   | 0    | 0    | 9             | 0    | 2    | 0    | 0    | 0.74 |
| 31. Barren. Washes      | 0   | 0          | 0    | 0    | 0    | 238  | 0    | 22   | 0    | 2             | 1    | 0    | 0    | 14   | 0.86 |
| 32. Barren. Mines       | 1   | 0          | 0    | 0    | 0    | 2    | 218  | 1    | 1    | 54            | 0    | 0    | 0    | 0    | 0.79 |
| 41. Deciduous Forest    | 0   | 0          | 0    | 0    | 0    | 6    | 0    | 242  | 0    | 3             | 12   | 3    | 1    | 10   | 0.87 |
| 42. Evergreen Forest    | 0   | 0          | 0    | 0    | 0    | 2    | 0    | 14   | 537  | 1             | 0    | 0    | 0    | 0    | 0.97 |
| 52. Shrubs              | 0   | 0          | 0    | 0    | 0    | 3    | 1    | 10   | 4    | 807           | 6    | 0    | 0    | 0    | 0.97 |
| 71. Grassland           | 0   | 0          | 0    | 0    | 0    | 0    | 0    | 19   | 0    | 10            | 243  | 0    | 5    | 0    | 0.88 |
| 81. Pasture and Parks   | 2   | 0          | 1    | 0    | 0    | 2    | 44   | 0    | 0    | 21            | 0    | 181  | 0    | 0    | 0.72 |
| 82. Cultivated Crops    | 0   | 0          | 0    | 0    | 0    | 0    | 0    | 2    | 1    | 7             | 0    | 10   | 534  | 0    | 0.96 |
| 91. Riparian Forest     | 0   | 0          | 0    | 0    | 0    | 6    | 0    | 45   | 0    | 2             | 0    | 0    | 4    | 220  | 0.79 |
| UA                      |     | 0.97       | 1.00 | 0.89 | 0.93 | 0.97 | 0.90 | 0.70 | 0.66 | 0.99          | 0.83 | 0.93 | 0.92 | 0.98 | 0.90 |

| 1988                    |     | OA = 89.7% |     |     |     |     |     |     |     | Kappa = 0.887 |    |    |    |    |      |
|-------------------------|-----|------------|-----|-----|-----|-----|-----|-----|-----|---------------|----|----|----|----|------|
| Classes                 | 11  | 21         | 22  | 23  | 24  | 31  | 32  | 41  | 42  | 52            | 71 | 81 | 82 | 91 | PA   |
| 11. Water               | 277 | 0          | 0   | 0   | 0   | 0   | 0   | 0   | 0   | 0             | 0  | 0  | 0  | 0  | 1.00 |
| 21. Developed. Roads    | 0   | 274        | 0   | 0   | 0   | 0   | 3   | 0   | 0   | 0             | 0  | 0  | 0  | 0  | 0.99 |
| 22. Urban. Low Density  | 0   | 0          | 236 | 7   | 0   | 2   | 0   | 8   | 0   | 24            | 0  | 0  | 0  | 0  | 0.85 |
| 23. Urban. Med. Density | 0   | 0          | 19  | 215 | 6   | 0   | 11  | 1   | 0   | 25            | 0  | 0  | 0  | 0  | 0.78 |
| 24. Urban. High Density | 5   | 0          | 8   | 11  | 206 | 0   | 36  | 0   | 0   | 9             | 0  | 2  | 0  | 0  | 0.74 |
| 31. Barren. Washes      | 0   | 0          | 0   | 0   | 0   | 239 | 0   | 21  | 0   | 2             | 1  | 0  | 0  | 14 | 0.86 |
| 32. Barren. Mines       | 1   | 0          | 0   | 0   | 0   | 2   | 222 | 0   | 1   | 50            | 0  | 0  | 0  | 1  | 0.80 |
| 41. Deciduous Forest    | 0   | 0          | 0   | 0   | 0   | 6   | 0   | 255 | 0   | 3             | 5  | 2  | 1  | 5  | 0.92 |
| 42. Evergreen Forest    | 0   | 0          | 0   | 0   | 0   | 1   | 0   | 13  | 539 | 1             | 0  | 0  | 0  | 0  | 0.97 |
| 52. Shrubs              | 0   | 0          | 0   | 0   | 0   | 2   | 1   | 9   | 3   | 811           | 5  | 0  | 0  | 0  | 0.98 |

|                       |      |      |      |      |      |      |      |      |      |      |      |      |      |      |      |
|-----------------------|------|------|------|------|------|------|------|------|------|------|------|------|------|------|------|
| 71. Grassland         | 0    | 0    | 0    | 0    | 0    | 0    | 0    | 18   | 0    | 9    | 243  | 1    | 6    | 0    | 0.88 |
| 81. Pasture and Parks | 2    | 0    | 1    | 0    | 0    | 2    | 44   | 0    | 0    | 21   | 0    | 181  | 0    | 0    | 0.72 |
| 82. Cultivated Crops  | 0    | 0    | 0    | 0    | 0    | 0    | 0    | 1    | 1    | 6    | 0    | 10   | 536  | 0    | 0.97 |
| 91. Riparian Forest   | 0    | 0    | 0    | 0    | 0    | 5    | 0    | 47   | 0    | 2    | 0    | 0    | 6    | 217  | 0.78 |
| UA                    | 0.97 | 1.00 | 0.89 | 0.92 | 0.97 | 0.92 | 0.70 | 0.68 | 0.99 | 0.84 | 0.96 | 0.92 | 0.98 | 0.92 |      |

| 1989                    |      | OA = 90.9% |      |      |      |      |      |      |      | Kappa = 0.900 |      |      |      |      |      |
|-------------------------|------|------------|------|------|------|------|------|------|------|---------------|------|------|------|------|------|
| Classes                 | 11   | 21         | 22   | 23   | 24   | 31   | 32   | 41   | 42   | 52            | 71   | 81   | 82   | 91   | PA   |
| 11. Water               | 277  | 0          | 0    | 0    | 0    | 0    | 0    | 0    | 0    | 0             | 0    | 0    | 0    | 0    | 1.00 |
| 21. Developed. Roads    | 0    | 274        | 0    | 0    | 0    | 0    | 3    | 0    | 0    | 0             | 0    | 0    | 0    | 0    | 0.99 |
| 22. Urban. Low Density  | 0    | 0          | 239  | 7    | 0    | 1    | 0    | 7    | 0    | 23            | 0    | 0    | 0    | 0    | 0.86 |
| 23. Urban. Med. Density | 0    | 0          | 24   | 212  | 5    | 0    | 10   | 1    | 0    | 25            | 0    | 0    | 0    | 0    | 0.77 |
| 24. Urban. High Density | 5    | 0          | 4    | 9    | 219  | 0    | 36   | 0    | 0    | 3             | 0    | 1    | 0    | 0    | 0.79 |
| 31. Barren. Washes      | 0    | 0          | 0    | 0    | 0    | 239  | 0    | 20   | 0    | 3             | 1    | 0    | 0    | 14   | 0.86 |
| 32. Barren. Mines       | 0    | 0          | 0    | 0    | 0    | 1    | 226  | 0    | 1    | 48            | 0    | 0    | 0    | 1    | 0.82 |
| 41. Deciduous Forest    | 0    | 0          | 0    | 0    | 0    | 6    | 0    | 258  | 0    | 3             | 4    | 1    | 1    | 4    | 0.93 |
| 42. Evergreen Forest    | 0    | 0          | 0    | 0    | 0    | 1    | 0    | 9    | 543  | 1             | 0    | 0    | 0    | 0    | 0.98 |
| 52. Shrubs              | 0    | 0          | 1    | 0    | 0    | 0    | 3    | 8    | 3    | 812           | 4    | 0    | 0    | 0    | 0.98 |
| 71. Grassland           | 0    | 0          | 0    | 0    | 0    | 0    | 0    | 20   | 0    | 9             | 245  | 1    | 2    | 0    | 0.88 |
| 81. Pasture and Parks   | 2    | 0          | 1    | 0    | 0    | 2    | 32   | 0    | 0    | 21            | 0    | 193  | 0    | 0    | 0.77 |
| 82. Cultivated Crops    | 0    | 0          | 0    | 0    | 0    | 0    | 0    | 4    | 0    | 1             | 0    | 11   | 538  | 0    | 0.97 |
| 91. Riparian Forest     | 0    | 0          | 0    | 0    | 0    | 2    | 0    | 34   | 0    | 1             | 0    | 0    | 3    | 237  | 0.86 |
| UA                      | 0.98 | 1.00       | 0.89 | 0.93 | 0.98 | 0.95 | 0.73 | 0.71 | 0.99 | 0.85          | 0.96 | 0.93 | 0.99 | 0.93 |      |

| 1990                    |      | OA = 91.5% |      |      |      |      |      |      |      | Kappa = 0.907 |      |      |      |      |      |
|-------------------------|------|------------|------|------|------|------|------|------|------|---------------|------|------|------|------|------|
| Classes                 | 11   | 21         | 22   | 23   | 24   | 31   | 32   | 41   | 42   | 52            | 71   | 81   | 82   | 91   | PA   |
| 11. Water               | 277  | 0          | 0    | 0    | 0    | 0    | 0    | 0    | 0    | 0             | 0    | 0    | 0    | 0    | 1.00 |
| 21. Developed. Roads    | 0    | 274        | 0    | 0    | 0    | 0    | 3    | 0    | 0    | 0             | 0    | 0    | 0    | 0    | 0.99 |
| 22. Urban. Low Density  | 0    | 0          | 247  | 5    | 0    | 1    | 0    | 4    | 0    | 20            | 0    | 0    | 0    | 0    | 0.89 |
| 23. Urban. Med. Density | 0    | 0          | 28   | 209  | 5    | 0    | 9    | 1    | 0    | 25            | 0    | 0    | 0    | 0    | 0.75 |
| 24. Urban. High Density | 5    | 0          | 6    | 8    | 220  | 0    | 36   | 0    | 0    | 1             | 0    | 1    | 0    | 0    | 0.79 |
| 31. Barren. Washes      | 0    | 0          | 0    | 0    | 0    | 241  | 0    | 16   | 0    | 4             | 0    | 0    | 0    | 16   | 0.87 |
| 32. Barren. Mines       | 0    | 0          | 0    | 0    | 0    | 1    | 226  | 0    | 1    | 48            | 0    | 0    | 0    | 1    | 0.82 |
| 41. Deciduous Forest    | 0    | 0          | 0    | 0    | 0    | 6    | 0    | 257  | 0    | 5             | 6    | 0    | 1    | 2    | 0.93 |
| 42. Evergreen Forest    | 0    | 0          | 0    | 0    | 0    | 1    | 0    | 8    | 544  | 1             | 0    | 0    | 0    | 0    | 0.98 |
| 52. Shrubs              | 0    | 0          | 1    | 0    | 0    | 0    | 4    | 9    | 3    | 809           | 5    | 0    | 0    | 0    | 0.97 |
| 71. Grassland           | 0    | 0          | 0    | 0    | 0    | 0    | 0    | 19   | 0    | 9             | 246  | 1    | 2    | 0    | 0.89 |
| 81. Pasture and Parks   | 2    | 0          | 1    | 0    | 0    | 2    | 10   | 0    | 0    | 21            | 0    | 215  | 0    | 0    | 0.86 |
| 82. Cultivated Crops    | 0    | 0          | 0    | 0    | 0    | 0    | 0    | 7    | 0    | 4             | 0    | 6    | 537  | 0    | 0.97 |
| 91. Riparian Forest     | 0    | 0          | 0    | 0    | 0    | 1    | 0    | 32   | 0    | 1             | 0    | 0    | 3    | 240  | 0.87 |
| UA                      | 0.98 | 1.00       | 0.87 | 0.94 | 0.98 | 0.95 | 0.78 | 0.73 | 0.99 | 0.85          | 0.96 | 0.96 | 0.99 | 0.93 |      |

| 1991                    |     | OA = 91.8% |     |     |     |     |     |    |    | Kappa = 0.911 |    |    |    |    |      |
|-------------------------|-----|------------|-----|-----|-----|-----|-----|----|----|---------------|----|----|----|----|------|
| Classes                 | 11  | 21         | 22  | 23  | 24  | 31  | 32  | 41 | 42 | 52            | 71 | 81 | 82 | 91 | PA   |
| 11. Water               | 277 | 0          | 0   | 0   | 0   | 0   | 0   | 0  | 0  | 0             | 0  | 0  | 0  | 0  | 1.00 |
| 21. Developed. Roads    | 0   | 274        | 0   | 0   | 0   | 0   | 3   | 0  | 0  | 0             | 0  | 0  | 0  | 0  | 0.99 |
| 22. Urban. Low Density  | 0   | 0          | 245 | 9   | 0   | 1   | 0   | 4  | 0  | 18            | 0  | 0  | 0  | 0  | 0.88 |
| 23. Urban. Med. Density | 0   | 0          | 25  | 213 | 7   | 0   | 6   | 1  | 0  | 25            | 0  | 0  | 0  | 0  | 0.77 |
| 24. Urban. High Density | 5   | 0          | 5   | 8   | 222 | 0   | 34  | 0  | 0  | 2             | 0  | 1  | 0  | 0  | 0.80 |
| 31. Barren. Washes      | 0   | 0          | 0   | 0   | 0   | 237 | 0   | 15 | 0  | 4             | 0  | 0  | 0  | 21 | 0.86 |
| 32. Barren. Mines       | 0   | 0          | 0   | 0   | 0   | 1   | 226 | 0  | 1  | 48            | 0  | 0  | 0  | 1  | 0.82 |

|                       |      |      |      |      |      |      |      |      |      |      |      |      |      |      |      |
|-----------------------|------|------|------|------|------|------|------|------|------|------|------|------|------|------|------|
| 41. Deciduous Forest  | 0    | 0    | 0    | 0    | 0    | 6    | 0    | 257  | 0    | 5    | 6    | 0    | 1    | 2    | 0.93 |
| 42. Evergreen Forest  | 0    | 0    | 0    | 0    | 0    | 1    | 0    | 7    | 545  | 1    | 0    | 0    | 0    | 0    | 0.98 |
| 52. Shrubs            | 0    | 0    | 1    | 0    | 0    | 0    | 1    | 12   | 3    | 808  | 6    | 0    | 0    | 0    | 0.97 |
| 71. Grassland         | 0    | 0    | 0    | 0    | 0    | 0    | 0    | 22   | 0    | 13   | 239  | 1    | 2    | 0    | 0.86 |
| 81. Pasture and Parks | 2    | 0    | 1    | 0    | 0    | 2    | 9    | 0    | 0    | 22   | 0    | 215  | 0    | 0    | 0.86 |
| 82. Cultivated Crops  | 0    | 0    | 0    | 0    | 0    | 0    | 0    | 7    | 0    | 4    | 0    | 5    | 538  | 0    | 0.97 |
| 91. Riparian Forest   | 0    | 0    | 0    | 0    | 0    | 0    | 0    | 14   | 0    | 1    | 0    | 0    | 0    | 262  | 0.95 |
| UA                    | 0.98 | 1.00 | 0.88 | 0.93 | 0.97 | 0.96 | 0.81 | 0.76 | 0.99 | 0.85 | 0.95 | 0.97 | 0.99 | 0.92 |      |

| 1992                    | OA = 92.0% |      |      |      |      |      |      | Kappa = 0.912 |      |      |      |      |      |      |      |
|-------------------------|------------|------|------|------|------|------|------|---------------|------|------|------|------|------|------|------|
| Classes                 | 11         | 21   | 22   | 23   | 24   | 31   | 32   | 41            | 42   | 52   | 71   | 81   | 82   | 91   | PA   |
| 11. Water               | 277        | 0    | 0    | 0    | 0    | 0    | 0    | 0             | 0    | 0    | 0    | 0    | 0    | 0    | 1.00 |
| 21. Developed. Roads    | 0          | 274  | 0    | 0    | 0    | 0    | 3    | 0             | 0    | 0    | 0    | 0    | 0    | 0    | 0.99 |
| 22. Urban. Low Density  | 0          | 0    | 245  | 9    | 0    | 1    | 2    | 4             | 0    | 16   | 0    | 0    | 0    | 0    | 0.88 |
| 23. Urban. Med. Density | 0          | 0    | 21   | 218  | 8    | 0    | 4    | 1             | 0    | 25   | 0    | 0    | 0    | 0    | 0.79 |
| 24. Urban. High Density | 5          | 1    | 4    | 10   | 220  | 0    | 34   | 0             | 0    | 2    | 0    | 1    | 0    | 0    | 0.79 |
| 31. Barren. Washes      | 0          | 0    | 0    | 0    | 0    | 236  | 0    | 17            | 1    | 4    | 0    | 0    | 0    | 19   | 0.85 |
| 32. Barren. Mines       | 0          | 0    | 0    | 0    | 0    | 0    | 229  | 0             | 1    | 46   | 0    | 0    | 0    | 1    | 0.83 |
| 41. Deciduous Forest    | 0          | 0    | 0    | 0    | 0    | 6    | 0    | 262           | 0    | 2    | 3    | 0    | 1    | 3    | 0.95 |
| 42. Evergreen Forest    | 0          | 0    | 0    | 0    | 0    | 1    | 0    | 7             | 545  | 1    | 0    | 0    | 0    | 0    | 0.98 |
| 52. Shrubs              | 0          | 0    | 1    | 0    | 0    | 0    | 1    | 14            | 3    | 804  | 8    | 0    | 0    | 0    | 0.97 |
| 71. Grassland           | 0          | 0    | 0    | 0    | 0    | 0    | 0    | 22            | 0    | 19   | 234  | 1    | 1    | 0    | 0.84 |
| 81. Pasture and Parks   | 2          | 0    | 1    | 0    | 0    | 2    | 9    | 0             | 0    | 21   | 0    | 216  | 0    | 0    | 0.86 |
| 82. Cultivated Crops    | 0          | 0    | 0    | 0    | 0    | 0    | 0    | 6             | 0    | 1    | 0    | 5    | 542  | 0    | 0.98 |
| 91. Riparian Forest     | 0          | 0    | 0    | 0    | 0    | 0    | 0    | 13            | 1    | 0    | 0    | 0    | 0    | 263  | 0.95 |
| UA                      | 0.98       | 1.00 | 0.90 | 0.92 | 0.96 | 0.96 | 0.81 | 0.76          | 0.99 | 0.85 | 0.96 | 0.97 | 1.00 | 0.92 |      |

| 1993                    | OA = 92.5% |      |      |      |      |      |      | Kappa = 0.917 |      |      |      |      |      |      |      |
|-------------------------|------------|------|------|------|------|------|------|---------------|------|------|------|------|------|------|------|
| Classes                 | 11         | 21   | 22   | 23   | 24   | 31   | 32   | 41            | 42   | 52   | 71   | 81   | 82   | 91   | PA   |
| 11. Water               | 277        | 0    | 0    | 0    | 0    | 0    | 0    | 0             | 0    | 0    | 0    | 0    | 0    | 0    | 1.00 |
| 21. Developed. Roads    | 0          | 274  | 0    | 0    | 0    | 0    | 3    | 0             | 0    | 0    | 0    | 0    | 0    | 0    | 0.99 |
| 22. Urban. Low Density  | 0          | 0    | 248  | 6    | 0    | 1    | 2    | 4             | 0    | 16   | 0    | 0    | 0    | 0    | 0.90 |
| 23. Urban. Med. Density | 0          | 0    | 18   | 222  | 9    | 0    | 3    | 1             | 0    | 24   | 0    | 0    | 0    | 0    | 0.80 |
| 24. Urban. High Density | 5          | 1    | 5    | 10   | 220  | 0    | 33   | 0             | 0    | 2    | 0    | 1    | 0    | 0    | 0.79 |
| 31. Barren. Washes      | 0          | 0    | 0    | 0    | 0    | 247  | 0    | 16            | 1    | 4    | 1    | 0    | 0    | 8    | 0.89 |
| 32. Barren. Mines       | 0          | 0    | 0    | 0    | 0    | 0    | 231  | 0             | 0    | 45   | 0    | 0    | 0    | 1    | 0.83 |
| 41. Deciduous Forest    | 0          | 0    | 0    | 0    | 0    | 5    | 0    | 263           | 0    | 2    | 3    | 0    | 1    | 3    | 0.95 |
| 42. Evergreen Forest    | 0          | 0    | 0    | 0    | 0    | 1    | 0    | 5             | 546  | 2    | 0    | 0    | 0    | 0    | 0.99 |
| 52. Shrubs              | 0          | 0    | 1    | 0    | 0    | 0    | 1    | 13            | 4    | 804  | 8    | 0    | 0    | 0    | 0.97 |
| 71. Grassland           | 0          | 0    | 0    | 0    | 0    | 0    | 0    | 13            | 0    | 17   | 246  | 0    | 1    | 0    | 0.89 |
| 81. Pasture and Parks   | 2          | 0    | 1    | 0    | 0    | 2    | 9    | 0             | 0    | 21   | 0    | 216  | 0    | 0    | 0.86 |
| 82. Cultivated Crops    | 0          | 0    | 0    | 0    | 0    | 0    | 0    | 5             | 0    | 1    | 0    | 5    | 543  | 0    | 0.98 |
| 91. Riparian Forest     | 0          | 0    | 0    | 0    | 0    | 3    | 0    | 16            | 6    | 0    | 0    | 0    | 0    | 252  | 0.91 |
| UA                      | 0.98       | 1.00 | 0.91 | 0.93 | 0.96 | 0.95 | 0.82 | 0.78          | 0.98 | 0.86 | 0.95 | 0.97 | 1.00 | 0.95 |      |

| 1994                    | OA = 92.7% |     |     |     |    |    |    | Kappa = 0.920 |    |    |    |    |    |    |      |
|-------------------------|------------|-----|-----|-----|----|----|----|---------------|----|----|----|----|----|----|------|
| Classes                 | 11         | 21  | 22  | 23  | 24 | 31 | 32 | 41            | 42 | 52 | 71 | 81 | 82 | 91 | PA   |
| 11. Water               | 277        | 0   | 0   | 0   | 0  | 0  | 0  | 0             | 0  | 0  | 0  | 0  | 0  | 0  | 1.00 |
| 21. Developed. Roads    | 0          | 274 | 0   | 0   | 0  | 0  | 3  | 0             | 0  | 0  | 0  | 0  | 0  | 0  | 0.99 |
| 22. Urban. Low Density  | 0          | 0   | 249 | 5   | 0  | 1  | 2  | 4             | 0  | 16 | 0  | 0  | 0  | 0  | 0.90 |
| 23. Urban. Med. Density | 0          | 0   | 19  | 227 | 5  | 0  | 3  | 1             | 0  | 22 | 0  | 0  | 0  | 0  | 0.82 |



|                         |      |      |      |      |      |      |      |      |      |      |      |      |      |      |      |
|-------------------------|------|------|------|------|------|------|------|------|------|------|------|------|------|------|------|
| 24. Urban. High Density | 5    | 1    | 4    | 10   | 221  | 0    | 33   | 0    | 0    | 2    | 0    | 1    | 0    | 0    | 0.80 |
| 31. Barren. Washes      | 0    | 0    | 0    | 0    | 0    | 248  | 0    | 16   | 0    | 4    | 1    | 0    | 0    | 8    | 0.90 |
| 32. Barren. Mines       | 0    | 0    | 0    | 0    | 0    | 0    | 231  | 0    | 0    | 45   | 0    | 0    | 0    | 1    | 0.83 |
| 41. Deciduous Forest    | 0    | 0    | 0    | 0    | 0    | 5    | 0    | 252  | 0    | 2    | 14   | 0    | 1    | 3    | 0.91 |
| 42. Evergreen Forest    | 0    | 0    | 0    | 0    | 0    | 1    | 0    | 7    | 544  | 2    | 0    | 0    | 0    | 0    | 0.98 |
| 52. Shrubs              | 0    | 0    | 1    | 0    | 0    | 0    | 1    | 12   | 3    | 812  | 2    | 0    | 0    | 0    | 0.98 |
| 71. Grassland           | 0    | 0    | 0    | 0    | 0    | 0    | 0    | 11   | 0    | 12   | 253  | 0    | 1    | 0    | 0.91 |
| 81. Pasture and Parks   | 2    | 0    | 1    | 0    | 0    | 2    | 9    | 0    | 0    | 22   | 0    | 215  | 0    | 0    | 0.86 |
| 82. Cultivated Crops    | 0    | 0    | 0    | 0    | 0    | 0    | 0    | 5    | 0    | 0    | 0    | 0    | 549  | 0    | 0.99 |
| 91. Riparian Forest     | 0    | 0    | 0    | 0    | 0    | 5    | 0    | 15   | 5    | 0    | 0    | 0    | 2    | 250  | 0.90 |
| UA                      | 0.98 | 1.00 | 0.91 | 0.94 | 0.98 | 0.95 | 0.82 | 0.78 | 0.99 | 0.86 | 0.94 | 1.00 | 0.99 | 0.95 |      |

| 1995                    | OA = 92.6% |      |      |      |      |      |      |      | Kappa = 0.918 |      |      |      |      |      |      |
|-------------------------|------------|------|------|------|------|------|------|------|---------------|------|------|------|------|------|------|
| Classes                 | 11         | 21   | 22   | 23   | 24   | 31   | 32   | 41   | 42            | 52   | 71   | 81   | 82   | 91   | PA   |
| 11. Water               | 277        | 0    | 0    | 0    | 0    | 0    | 0    | 0    | 0             | 0    | 0    | 0    | 0    | 0    | 1.00 |
| 21. Developed. Roads    | 0          | 274  | 0    | 0    | 0    | 0    | 3    | 0    | 0             | 0    | 0    | 0    | 0    | 0    | 0.99 |
| 22. Urban. Low Density  | 0          | 0    | 246  | 8    | 0    | 1    | 2    | 3    | 0             | 16   | 0    | 0    | 0    | 1    | 0.89 |
| 23. Urban. Med. Density | 0          | 0    | 22   | 227  | 3    | 0    | 5    | 1    | 0             | 19   | 0    | 0    | 0    | 0    | 0.82 |
| 24. Urban. High Density | 5          | 1    | 4    | 10   | 221  | 0    | 34   | 0    | 0             | 1    | 0    | 1    | 0    | 0    | 0.80 |
| 31. Barren. Washes      | 0          | 0    | 0    | 0    | 0    | 248  | 0    | 18   | 0             | 4    | 1    | 0    | 0    | 6    | 0.90 |
| 32. Barren. Mines       | 0          | 0    | 0    | 0    | 0    | 0    | 230  | 0    | 0             | 46   | 0    | 0    | 0    | 1    | 0.83 |
| 41. Deciduous Forest    | 0          | 0    | 0    | 0    | 0    | 7    | 0    | 250  | 0             | 2    | 14   | 0    | 1    | 3    | 0.90 |
| 42. Evergreen Forest    | 0          | 0    | 0    | 0    | 0    | 1    | 0    | 13   | 538           | 2    | 0    | 0    | 0    | 0    | 0.97 |
| 52. Shrubs              | 0          | 0    | 1    | 0    | 0    | 0    | 0    | 6    | 3             | 819  | 2    | 0    | 0    | 0    | 0.99 |
| 71. Grassland           | 0          | 0    | 0    | 0    | 0    | 0    | 0    | 13   | 0             | 10   | 254  | 0    | 0    | 0    | 0.92 |
| 81. Pasture and Parks   | 2          | 0    | 1    | 0    | 0    | 2    | 9    | 0    | 0             | 22   | 0    | 215  | 0    | 0    | 0.86 |
| 82. Cultivated Crops    | 0          | 0    | 0    | 0    | 0    | 0    | 0    | 7    | 0             | 0    | 0    | 0    | 547  | 0    | 0.99 |
| 91. Riparian Forest     | 0          | 0    | 0    | 0    | 0    | 5    | 0    | 17   | 5             | 0    | 0    | 0    | 3    | 247  | 0.89 |
|                         | UA 0.98    | 1.00 | 0.90 | 0.93 | 0.99 | 0.94 | 0.81 | 0.76 | 0.99          | 0.87 | 0.94 | 1.00 | 0.99 | 0.96 |      |

| 1996                    | OA = 92.8% |      |      |      |      |      |      |      |      | Kappa = 0.921 |      |      |      |      |      |
|-------------------------|------------|------|------|------|------|------|------|------|------|---------------|------|------|------|------|------|
| Classes                 | 11         | 21   | 22   | 23   | 24   | 31   | 32   | 41   | 42   | 52            | 71   | 81   | 82   | 91   | PA   |
| 11. Water               | 277        | 0    | 0    | 0    | 0    | 0    | 0    | 0    | 0    | 0             | 0    | 0    | 0    | 0    | 1.00 |
| 21. Developed. Roads    | 0          | 274  | 0    | 0    | 0    | 0    | 3    | 0    | 0    | 0             | 0    | 0    | 0    | 0    | 0.99 |
| 22. Urban. Low Density  | 0          | 0    | 243  | 11   | 0    | 1    | 3    | 3    | 0    | 15            | 0    | 0    | 0    | 1    | 0.88 |
| 23. Urban. Med. Density | 0          | 0    | 21   | 232  | 1    | 0    | 4    | 0    | 0    | 19            | 0    | 0    | 0    | 0    | 0.84 |
| 24. Urban. High Density | 5          | 0    | 4    | 9    | 223  | 0    | 34   | 0    | 0    | 1             | 0    | 1    | 0    | 0    | 0.81 |
| 31. Barren. Washes      | 0          | 0    | 0    | 0    | 0    | 245  | 0    | 20   | 0    | 5             | 1    | 0    | 0    | 6    | 0.88 |
| 32. Barren. Mines       | 0          | 0    | 0    | 0    | 0    | 0    | 227  | 0    | 0    | 49            | 0    | 0    | 0    | 1    | 0.82 |
| 41. Deciduous Forest    | 0          | 0    | 0    | 0    | 0    | 7    | 0    | 254  | 1    | 1             | 11   | 0    | 1    | 2    | 0.92 |
| 42. Evergreen Forest    | 0          | 0    | 0    | 0    | 0    | 1    | 0    | 14   | 537  | 2             | 0    | 0    | 0    | 0    | 0.97 |
| 52. Shrubs              | 0          | 0    | 1    | 0    | 0    | 0    | 1    | 5    | 2    | 817           | 5    | 0    | 0    | 0    | 0.98 |
| 71. Grassland           | 0          | 0    | 0    | 0    | 0    | 0    | 0    | 11   | 0    | 7             | 257  | 2    | 0    | 0    | 0.93 |
| 81. Pasture and Parks   | 2          | 0    | 1    | 0    | 0    | 2    | 3    | 0    | 0    | 27            | 0    | 216  | 0    | 0    | 0.86 |
| 82. Cultivated Crops    | 0          | 0    | 0    | 0    | 0    | 0    | 0    | 8    | 0    | 0             | 0    | 0    | 546  | 0    | 0.99 |
| 91. Riparian Forest     | 0          | 0    | 0    | 0    | 0    | 0    | 0    | 16   | 3    | 0             | 0    | 0    | 1    | 257  | 0.93 |
|                         | UA 0.98    | 1.00 | 0.90 | 0.92 | 1.00 | 0.96 | 0.83 | 0.77 | 0.99 | 0.87          | 0.94 | 0.99 | 1.00 | 0.96 |      |

[illegible]

|                         |      |      |      |      |      |      |      |      |      |      |      |      |      |      |      |
|-------------------------|------|------|------|------|------|------|------|------|------|------|------|------|------|------|------|
| 21. Developed. Roads    | 0    | 274  | 0    | 0    | 0    | 0    | 3    | 0    | 0    | 0    | 0    | 0    | 0    | 0    | 0.99 |
| 22. Urban. Low Density  | 0    | 0    | 242  | 12   | 0    | 1    | 3    | 3    | 0    | 15   | 0    | 0    | 0    | 1    | 0.87 |
| 23. Urban. Med. Density | 0    | 0    | 21   | 232  | 3    | 0    | 4    | 0    | 0    | 17   | 0    | 0    | 0    | 0    | 0.84 |
| 24. Urban. High Density | 5    | 0    | 4    | 10   | 223  | 0    | 32   | 0    | 0    | 2    | 0    | 1    | 0    | 0    | 0.81 |
| 31. Barren. Washes      | 0    | 0    | 0    | 0    | 0    | 236  | 0    | 32   | 0    | 6    | 2    | 0    | 0    | 1    | 0.85 |
| 32. Barren. Mines       | 0    | 0    | 0    | 0    | 0    | 0    | 226  | 0    | 0    | 51   | 0    | 0    | 0    | 0    | 0.82 |
| 41. Deciduous Forest    | 0    | 0    | 0    | 0    | 0    | 7    | 0    | 252  | 1    | 0    | 11   | 0    | 4    | 2    | 0.91 |
| 42. Evergreen Forest    | 0    | 0    | 0    | 0    | 0    | 1    | 0    | 14   | 537  | 2    | 0    | 0    | 0    | 0    | 0.97 |
| 52. Shrubs              | 0    | 0    | 1    | 0    | 0    | 0    | 1    | 5    | 2    | 816  | 6    | 0    | 0    | 0    | 0.98 |
| 71. Grassland           | 0    | 0    | 0    | 0    | 0    | 0    | 0    | 11   | 0    | 14   | 250  | 2    | 0    | 0    | 0.90 |
| 81. Pasture and Parks   | 2    | 0    | 1    | 0    | 0    | 2    | 3    | 0    | 0    | 27   | 0    | 216  | 0    | 0    | 0.86 |
| 82. Cultivated Crops    | 0    | 0    | 0    | 0    | 0    | 1    | 0    | 10   | 0    | 0    | 0    | 0    | 543  | 0    | 0.98 |
| 91. Riparian Forest     | 0    | 0    | 0    | 0    | 0    | 0    | 0    | 10   | 3    | 0    | 0    | 0    | 0    | 264  | 0.95 |
| UA                      | 0.98 | 1.00 | 0.90 | 0.91 | 0.99 | 0.95 | 0.83 | 0.75 | 0.99 | 0.86 | 0.93 | 0.99 | 0.99 | 0.99 |      |

| 1998                    | OA = 92.8% |      |      |      |      |      |      | Kappa = 0.921 |      |      |      |      |      |      |      |
|-------------------------|------------|------|------|------|------|------|------|---------------|------|------|------|------|------|------|------|
| Classes                 | 11         | 21   | 22   | 23   | 24   | 31   | 32   | 41            | 42   | 52   | 71   | 81   | 82   | 91   | PA   |
| 11. Water               | 277        | 0    | 0    | 0    | 0    | 0    | 0    | 0             | 0    | 0    | 0    | 0    | 0    | 0    | 1.00 |
| 21. Developed. Roads    | 0          | 274  | 0    | 0    | 0    | 0    | 3    | 0             | 0    | 0    | 0    | 0    | 0    | 0    | 0.99 |
| 22. Urban. Low Density  | 0          | 0    | 243  | 12   | 0    | 1    | 2    | 3             | 0    | 15   | 0    | 0    | 0    | 1    | 0.88 |
| 23. Urban. Med. Density | 0          | 0    | 21   | 228  | 12   | 0    | 3    | 0             | 0    | 13   | 0    | 0    | 0    | 0    | 0.82 |
| 24. Urban. High Density | 5          | 0    | 3    | 9    | 225  | 0    | 32   | 0             | 0    | 2    | 0    | 1    | 0    | 0    | 0.81 |
| 31. Barren. Washes      | 0          | 0    | 0    | 0    | 0    | 238  | 0    | 30            | 0    | 5    | 3    | 0    | 0    | 1    | 0.86 |
| 32. Barren. Mines       | 0          | 0    | 0    | 0    | 0    | 0    | 226  | 0             | 0    | 51   | 0    | 0    | 0    | 0    | 0.82 |
| 41. Deciduous Forest    | 0          | 0    | 0    | 0    | 0    | 1    | 0    | 251           | 1    | 5    | 11   | 0    | 4    | 4    | 0.91 |
| 42. Evergreen Forest    | 0          | 0    | 0    | 0    | 0    | 1    | 0    | 13            | 539  | 1    | 0    | 0    | 0    | 0    | 0.97 |
| 52. Shrubs              | 0          | 0    | 1    | 0    | 0    | 0    | 1    | 4             | 2    | 821  | 2    | 0    | 0    | 0    | 0.99 |
| 71. Grassland           | 0          | 0    | 0    | 0    | 0    | 0    | 0    | 12            | 0    | 10   | 255  | 0    | 0    | 0    | 0.92 |
| 81. Pasture and Parks   | 2          | 0    | 1    | 0    | 0    | 2    | 7    | 0             | 0    | 23   | 0    | 216  | 0    | 0    | 0.86 |
| 82. Cultivated Crops    | 0          | 0    | 0    | 0    | 0    | 1    | 0    | 8             | 0    | 0    | 0    | 0    | 545  | 0    | 0.98 |
| 91. Riparian Forest     | 0          | 0    | 0    | 0    | 0    | 0    | 0    | 11            | 0    | 0    | 0    | 0    | 0    | 266  | 0.96 |
| UA                      | 0.98       | 1.00 | 0.90 | 0.92 | 0.95 | 0.98 | 0.82 | 0.76          | 0.99 | 0.87 | 0.94 | 1.00 | 0.99 | 0.98 |      |

| 1999                    | OA = 92.9% |      |      |      |      |      |      | Kappa = 0.922 |      |      |      |      |      |      |      |
|-------------------------|------------|------|------|------|------|------|------|---------------|------|------|------|------|------|------|------|
| Classes                 | 11         | 21   | 22   | 23   | 24   | 31   | 32   | 41            | 42   | 52   | 71   | 81   | 82   | 91   | PA   |
| 11. Water               | 277        | 0    | 0    | 0    | 0    | 0    | 0    | 0             | 0    | 0    | 0    | 0    | 0    | 0    | 1.00 |
| 21. Developed. Roads    | 0          | 274  | 0    | 0    | 0    | 0    | 3    | 0             | 0    | 0    | 0    | 0    | 0    | 0    | 0.99 |
| 22. Urban. Low Density  | 0          | 0    | 245  | 10   | 0    | 1    | 2    | 3             | 0    | 15   | 0    | 0    | 0    | 1    | 0.88 |
| 23. Urban. Med. Density | 0          | 0    | 21   | 229  | 15   | 0    | 3    | 0             | 0    | 9    | 0    | 0    | 0    | 0    | 0.83 |
| 24. Urban. High Density | 5          | 0    | 4    | 8    | 225  | 0    | 32   | 0             | 0    | 2    | 0    | 1    | 0    | 0    | 0.81 |
| 31. Barren. Washes      | 0          | 0    | 0    | 0    | 0    | 244  | 0    | 23            | 0    | 8    | 2    | 0    | 0    | 0    | 0.88 |
| 32. Barren. Mines       | 0          | 0    | 0    | 0    | 0    | 0    | 225  | 0             | 0    | 52   | 0    | 0    | 0    | 0    | 0.81 |
| 41. Deciduous Forest    | 0          | 0    | 0    | 0    | 0    | 1    | 0    | 260           | 1    | 6    | 4    | 0    | 1    | 4    | 0.94 |
| 42. Evergreen Forest    | 0          | 0    | 0    | 0    | 0    | 1    | 0    | 15            | 537  | 1    | 0    | 0    | 0    | 0    | 0.97 |
| 52. Shrubs              | 0          | 0    | 1    | 0    | 0    | 0    | 1    | 4             | 2    | 821  | 2    | 0    | 0    | 0    | 0.99 |
| 71. Grassland           | 0          | 0    | 0    | 0    | 0    | 0    | 0    | 12            | 0    | 9    | 256  | 0    | 0    | 0    | 0.92 |
| 81. Pasture and Parks   | 2          | 0    | 1    | 0    | 0    | 2    | 10   | 0             | 0    | 20   | 0    | 216  | 0    | 0    | 0.86 |
| 82. Cultivated Crops    | 0          | 0    | 0    | 0    | 0    | 2    | 0    | 8             | 0    | 0    | 0    | 0    | 544  | 0    | 0.98 |
| 91. Riparian Forest     | 0          | 0    | 0    | 0    | 0    | 2    | 0    | 17            | 0    | 0    | 0    | 0    | 0    | 258  | 0.93 |
| UA                      | 0.98       | 1.00 | 0.90 | 0.93 | 0.94 | 0.96 | 0.82 | 0.76          | 0.99 | 0.87 | 0.97 | 1.00 | 1.00 | 0.98 |      |

| 2000                    | OA = 93.0% |      |      |      |      |      |      |      |      | Kappa = 0.923 |      |      |      |      |      |
|-------------------------|------------|------|------|------|------|------|------|------|------|---------------|------|------|------|------|------|
| Classes                 | 11         | 21   | 22   | 23   | 24   | 31   | 32   | 41   | 42   | 52            | 71   | 81   | 82   | 91   | PA   |
| 11. Water               | 277        | 0    | 0    | 0    | 0    | 0    | 0    | 0    | 0    | 0             | 0    | 0    | 0    | 0    | 1.00 |
| 21. Developed. Roads    | 0          | 274  | 0    | 0    | 0    | 0    | 3    | 0    | 0    | 0             | 0    | 0    | 0    | 0    | 0.99 |
| 22. Urban. Low Density  | 0          | 0    | 248  | 7    | 0    | 1    | 2    | 3    | 0    | 15            | 0    | 0    | 0    | 1    | 0.90 |
| 23. Urban. Med. Density | 0          | 0    | 23   | 232  | 10   | 0    | 4    | 0    | 0    | 8             | 0    | 0    | 0    | 0    | 0.84 |
| 24. Urban. High Density | 5          | 0    | 4    | 8    | 226  | 0    | 32   | 0    | 0    | 2             | 0    | 0    | 0    | 0    | 0.82 |
| 31. Barren. Washes      | 0          | 0    | 0    | 0    | 0    | 240  | 0    | 26   | 0    | 9             | 2    | 0    | 0    | 0    | 0.87 |
| 32. Barren. Mines       | 0          | 0    | 0    | 0    | 0    | 0    | 228  | 0    | 1    | 48            | 0    | 0    | 0    | 0    | 0.82 |
| 41. Deciduous Forest    | 0          | 0    | 0    | 0    | 0    | 1    | 0    | 261  | 1    | 6             | 2    | 0    | 1    | 5    | 0.94 |
| 42. Evergreen Forest    | 0          | 0    | 0    | 0    | 0    | 1    | 0    | 15   | 536  | 1             | 0    | 0    | 0    | 1    | 0.97 |
| 52. Shrubs              | 0          | 0    | 1    | 0    | 0    | 0    | 0    | 4    | 0    | 823           | 3    | 0    | 0    | 0    | 0.99 |
| 71. Grassland           | 0          | 0    | 0    | 0    | 0    | 1    | 0    | 11   | 0    | 13            | 252  | 0    | 0    | 0    | 0.91 |
| 81. Pasture and Parks   | 2          | 0    | 1    | 0    | 0    | 2    | 10   | 0    | 0    | 19            | 0    | 217  | 0    | 0    | 0.86 |
| 82. Cultivated Crops    | 0          | 0    | 0    | 0    | 0    | 2    | 0    | 8    | 0    | 0             | 0    | 0    | 544  | 0    | 0.98 |
| 91. Riparian Forest     | 0          | 0    | 0    | 0    | 0    | 2    | 0    | 17   | 0    | 0             | 0    | 0    | 0    | 258  | 0.93 |
| UA                      | 0.98       | 1.00 | 0.90 | 0.94 | 0.96 | 0.96 | 0.82 | 0.76 | 1.00 | 0.87          | 0.97 | 1.00 | 1.00 | 0.97 |      |

| 2001                    | OA = 93.2% |      |      |      |      |      |      |      |      | Kappa = 0.925 |      |      |      |      |      |
|-------------------------|------------|------|------|------|------|------|------|------|------|---------------|------|------|------|------|------|
| Classes                 | 11         | 21   | 22   | 23   | 24   | 31   | 32   | 41   | 42   | 52            | 71   | 81   | 82   | 91   | PA   |
| 11. Water               | 277        | 0    | 0    | 0    | 0    | 0    | 0    | 0    | 0    | 0             | 0    | 0    | 0    | 0    | 1.00 |
| 21. Developed. Roads    | 0          | 274  | 0    | 0    | 0    | 0    | 3    | 0    | 0    | 0             | 0    | 0    | 0    | 0    | 0.99 |
| 22. Urban. Low Density  | 0          | 0    | 247  | 8    | 0    | 1    | 2    | 3    | 0    | 15            | 0    | 0    | 0    | 1    | 0.89 |
| 23. Urban. Med. Density | 0          | 0    | 23   | 235  | 9    | 0    | 3    | 0    | 0    | 7             | 0    | 0    | 0    | 0    | 0.85 |
| 24. Urban. High Density | 5          | 0    | 3    | 8    | 227  | 0    | 31   | 0    | 0    | 3             | 0    | 0    | 0    | 0    | 0.82 |
| 31. Barren. Washes      | 0          | 0    | 0    | 0    | 0    | 245  | 0    | 21   | 0    | 9             | 2    | 0    | 0    | 0    | 0.88 |
| 32. Barren. Mines       | 0          | 0    | 0    | 0    | 0    | 0    | 226  | 0    | 1    | 50            | 0    | 0    | 0    | 0    | 0.82 |
| 41. Deciduous Forest    | 0          | 0    | 0    | 0    | 0    | 1    | 0    | 262  | 1    | 5             | 2    | 0    | 1    | 5    | 0.95 |
| 42. Evergreen Forest    | 0          | 0    | 0    | 0    | 0    | 1    | 0    | 12   | 538  | 2             | 0    | 0    | 0    | 1    | 0.97 |
| 52. Shrubs              | 0          | 0    | 1    | 0    | 0    | 0    | 0    | 5    | 0    | 824           | 1    | 0    | 0    | 0    | 0.99 |
| 71. Grassland           | 0          | 0    | 0    | 0    | 0    | 1    | 0    | 11   | 0    | 15            | 250  | 0    | 0    | 0    | 0.90 |
| 81. Pasture and Parks   | 2          | 0    | 1    | 0    | 0    | 2    | 10   | 0    | 0    | 19            | 0    | 217  | 0    | 0    | 0.86 |
| 82. Cultivated Crops    | 0          | 0    | 0    | 0    | 0    | 2    | 0    | 7    | 0    | 3             | 0    | 0    | 542  | 0    | 0.98 |
| 91. Riparian Forest     | 0          | 0    | 0    | 0    | 0    | 2    | 0    | 14   | 0    | 0             | 0    | 0    | 0    | 261  | 0.94 |
| UA                      | 0.98       | 1.00 | 0.90 | 0.94 | 0.96 | 0.96 | 0.82 | 0.78 | 1.00 | 0.87          | 0.98 | 1.00 | 1.00 | 0.97 |      |

| 2002                    | OA = 93.6% |     |     |     |     |     |     |     |     | Kappa = 0.929 |     |     |     |    |      |
|-------------------------|------------|-----|-----|-----|-----|-----|-----|-----|-----|---------------|-----|-----|-----|----|------|
| Classes                 | 11         | 21  | 22  | 23  | 24  | 31  | 32  | 41  | 42  | 52            | 71  | 81  | 82  | 91 | PA   |
| 11. Water               | 277        | 0   | 0   | 0   | 0   | 0   | 0   | 0   | 0   | 0             | 0   | 0   | 0   | 0  | 1.00 |
| 21. Developed. Roads    | 0          | 274 | 0   | 0   | 0   | 0   | 3   | 0   | 0   | 0             | 0   | 0   | 0   | 0  | 0.99 |
| 22. Urban. Low Density  | 0          | 0   | 246 | 9   | 0   | 1   | 2   | 3   | 0   | 15            | 0   | 0   | 0   | 1  | 0.89 |
| 23. Urban. Med. Density | 0          | 0   | 27  | 238 | 5   | 0   | 2   | 0   | 0   | 5             | 0   | 0   | 0   | 0  | 0.86 |
| 24. Urban. High Density | 6          | 0   | 2   | 9   | 227 | 0   | 30  | 0   | 0   | 3             | 0   | 0   | 0   | 0  | 0.82 |
| 31. Barren. Washes      | 0          | 0   | 0   | 0   | 0   | 244 | 0   | 21  | 0   | 10            | 2   | 0   | 0   | 0  | 0.88 |
| 32. Barren. Mines       | 0          | 0   | 0   | 0   | 0   | 0   | 226 | 0   | 1   | 50            | 0   | 0   | 0   | 0  | 0.82 |
| 41. Deciduous Forest    | 0          | 0   | 0   | 0   | 0   | 1   | 0   | 263 | 1   | 5             | 1   | 0   | 2   | 4  | 0.95 |
| 42. Evergreen Forest    | 0          | 0   | 0   | 0   | 0   | 1   | 0   | 12  | 540 | 1             | 0   | 0   | 0   | 0  | 0.97 |
| 52. Shrubs              | 0          | 0   | 1   | 0   | 0   | 0   | 0   | 4   | 0   | 826           | 0   | 0   | 0   | 0  | 0.99 |
| 71. Grassland           | 0          | 0   | 0   | 0   | 0   | 1   | 0   | 10  | 0   | 16            | 250 | 0   | 0   | 0  | 0.90 |
| 81. Pasture and Parks   | 2          | 0   | 1   | 0   | 0   | 0   | 0   | 0   | 0   | 20            | 0   | 228 | 0   | 0  | 0.91 |
| 82. Cultivated Crops    | 0          | 0   | 0   | 0   | 0   | 2   | 0   | 8   | 1   | 3             | 0   | 0   | 540 | 0  | 0.97 |

|                     |      |      |      |      |      |      |      |      |      |      |      |      |      |      |      |
|---------------------|------|------|------|------|------|------|------|------|------|------|------|------|------|------|------|
| 91. Riparian Forest | 0    | 0    | 0    | 0    | 0    | 0    | 0    | 13   | 0    | 0    | 0    | 0    | 0    | 264  | 0.95 |
| UA                  | 0.97 | 1.00 | 0.89 | 0.93 | 0.98 | 0.98 | 0.86 | 0.79 | 0.99 | 0.87 | 0.99 | 1.00 | 1.00 | 0.98 |      |

|                         |      |            |      |      |      |      |      |      |      |               |      |      |      |      |      |
|-------------------------|------|------------|------|------|------|------|------|------|------|---------------|------|------|------|------|------|
| 2003                    |      | OA = 93.5% |      |      |      |      |      |      |      | Kappa = 0.929 |      |      |      |      |      |
| Classes                 | 11   | 21         | 22   | 23   | 24   | 31   | 32   | 41   | 42   | 52            | 71   | 81   | 82   | 91   | PA   |
| 11. Water               | 277  | 0          | 0    | 0    | 0    | 0    | 0    | 0    | 0    | 0             | 0    | 0    | 0    | 0    | 1.00 |
| 21. Developed. Roads    | 0    | 274        | 0    | 0    | 0    | 0    | 3    | 0    | 0    | 0             | 0    | 0    | 0    | 0    | 0.99 |
| 22. Urban. Low Density  | 0    | 0          | 248  | 7    | 0    | 1    | 2    | 3    | 0    | 15            | 0    | 0    | 0    | 1    | 0.90 |
| 23. Urban. Med. Density | 0    | 0          | 25   | 245  | 1    | 0    | 1    | 0    | 0    | 5             | 0    | 0    | 0    | 0    | 0.88 |
| 24. Urban. High Density | 6    | 0          | 3    | 9    | 226  | 0    | 32   | 0    | 0    | 1             | 0    | 0    | 0    | 0    | 0.82 |
| 31. Barren. Washes      | 0    | 0          | 0    | 0    | 0    | 243  | 0    | 24   | 0    | 8             | 1    | 1    | 0    | 0    | 0.88 |
| 32. Barren. Mines       | 0    | 0          | 0    | 0    | 0    | 0    | 222  | 0    | 1    | 54            | 0    | 0    | 0    | 0    | 0.80 |
| 41. Deciduous Forest    | 0    | 0          | 0    | 0    | 0    | 1    | 0    | 264  | 1    | 5             | 0    | 0    | 2    | 4    | 0.95 |
| 42. Evergreen Forest    | 0    | 0          | 0    | 0    | 0    | 1    | 0    | 13   | 539  | 1             | 0    | 0    | 0    | 0    | 0.97 |
| 52. Shrubs              | 0    | 0          | 2    | 0    | 0    | 0    | 0    | 4    | 0    | 819           | 6    | 0    | 0    | 0    | 0.99 |
| 71. Grassland           | 0    | 0          | 0    | 0    | 0    | 1    | 0    | 10   | 0    | 17            | 249  | 0    | 0    | 0    | 0.90 |
| 81. Pasture and Parks   | 2    | 0          | 1    | 0    | 0    | 0    | 1    | 0    | 0    | 19            | 0    | 228  | 0    | 0    | 0.91 |
| 82. Cultivated Crops    | 0    | 0          | 0    | 0    | 0    | 2    | 0    | 7    | 1    | 0             | 0    | 0    | 543  | 1    | 0.98 |
| 91. Riparian Forest     | 0    | 0          | 0    | 0    | 0    | 0    | 0    | 13   | 0    | 0             | 0    | 0    | 0    | 264  | 0.95 |
| UA                      | 0.97 | 1.00       | 0.89 | 0.94 | 1.00 | 0.98 | 0.85 | 0.78 | 0.99 | 0.87          | 0.97 | 1.00 | 1.00 | 0.98 |      |

|                         |      |            |      |      |      |      |      |      |      |               |      |      |      |      |      |
|-------------------------|------|------------|------|------|------|------|------|------|------|---------------|------|------|------|------|------|
| 2004                    |      | OA = 93.6% |      |      |      |      |      |      |      | Kappa = 0.930 |      |      |      |      |      |
| Classes                 | 11   | 21         | 22   | 23   | 24   | 31   | 32   | 41   | 42   | 52            | 71   | 81   | 82   | 91   | PA   |
| 11. Water               | 277  | 0          | 0    | 0    | 0    | 0    | 0    | 0    | 0    | 0             | 0    | 0    | 0    | 0    | 1.00 |
| 21. Developed. Roads    | 0    | 274        | 0    | 0    | 0    | 0    | 3    | 0    | 0    | 0             | 0    | 0    | 0    | 0    | 0.99 |
| 22. Urban. Low Density  | 0    | 0          | 248  | 7    | 0    | 1    | 2    | 2    | 0    | 16            | 0    | 0    | 0    | 1    | 0.90 |
| 23. Urban. Med. Density | 0    | 0          | 24   | 246  | 1    | 0    | 1    | 0    | 0    | 5             | 0    | 0    | 0    | 0    | 0.89 |
| 24. Urban. High Density | 5    | 0          | 1    | 9    | 229  | 0    | 33   | 0    | 0    | 0             | 0    | 0    | 0    | 0    | 0.83 |
| 31. Barren. Washes      | 0    | 0          | 0    | 0    | 0    | 238  | 0    | 28   | 0    | 8             | 1    | 1    | 0    | 1    | 0.86 |
| 32. Barren. Mines       | 0    | 0          | 0    | 0    | 0    | 0    | 222  | 0    | 1    | 54            | 0    | 0    | 0    | 0    | 0.80 |
| 41. Deciduous Forest    | 0    | 0          | 0    | 0    | 0    | 1    | 0    | 269  | 1    | 3             | 0    | 0    | 0    | 3    | 0.97 |
| 42. Evergreen Forest    | 0    | 0          | 0    | 0    | 0    | 1    | 0    | 12   | 540  | 1             | 0    | 0    | 0    | 0    | 0.97 |
| 52. Shrubs              | 0    | 0          | 2    | 0    | 0    | 1    | 0    | 4    | 1    | 816           | 7    | 0    | 0    | 0    | 0.98 |
| 71. Grassland           | 0    | 0          | 0    | 0    | 0    | 1    | 0    | 9    | 0    | 13            | 254  | 0    | 0    | 0    | 0.92 |
| 81. Pasture and Parks   | 2    | 0          | 1    | 0    | 0    | 0    | 1    | 0    | 0    | 18            | 0    | 229  | 0    | 0    | 0.91 |
| 82. Cultivated Crops    | 0    | 0          | 0    | 0    | 0    | 2    | 0    | 7    | 1    | 0             | 0    | 0    | 542  | 2    | 0.98 |
| 91. Riparian Forest     | 0    | 0          | 0    | 0    | 0    | 0    | 0    | 14   | 0    | 0             | 0    | 0    | 1    | 262  | 0.95 |
| UA                      | 0.98 | 1.00       | 0.90 | 0.94 | 1.00 | 0.97 | 0.85 | 0.78 | 0.99 | 0.87          | 0.97 | 1.00 | 1.00 | 0.97 |      |

|                         |     |            |     |     |     |     |     |     |     |               |    |    |    |    |      |
|-------------------------|-----|------------|-----|-----|-----|-----|-----|-----|-----|---------------|----|----|----|----|------|
| 2005                    |     | OA = 94.4% |     |     |     |     |     |     |     | Kappa = 0.938 |    |    |    |    |      |
| Classes                 | 11  | 21         | 22  | 23  | 24  | 31  | 32  | 41  | 42  | 52            | 71 | 81 | 82 | 91 | PA   |
| 11. Water               | 277 | 0          | 0   | 0   | 0   | 0   | 0   | 0   | 0   | 0             | 0  | 0  | 0  | 0  | 1.00 |
| 21. Developed. Roads    | 0   | 274        | 0   | 0   | 0   | 0   | 3   | 0   | 0   | 0             | 0  | 0  | 0  | 0  | 0.99 |
| 22. Urban. Low Density  | 0   | 0          | 249 | 6   | 0   | 2   | 2   | 2   | 0   | 15            | 0  | 0  | 0  | 1  | 0.90 |
| 23. Urban. Med. Density | 0   | 0          | 22  | 247 | 4   | 0   | 2   | 0   | 0   | 2             | 0  | 0  | 0  | 0  | 0.89 |
| 24. Urban. High Density | 4   | 0          | 1   | 6   | 235 | 0   | 31  | 0   | 0   | 0             | 0  | 0  | 0  | 0  | 0.85 |
| 31. Barren. Washes      | 0   | 0          | 0   | 0   | 0   | 242 | 0   | 20  | 0   | 7             | 7  | 0  | 0  | 1  | 0.87 |
| 32. Barren. Mines       | 0   | 0          | 0   | 0   | 0   | 0   | 225 | 0   | 0   | 52            | 0  | 0  | 0  | 0  | 0.81 |
| 41. Deciduous Forest    | 0   | 0          | 0   | 0   | 0   | 1   | 0   | 269 | 1   | 3             | 1  | 0  | 0  | 2  | 0.97 |
| 42. Evergreen Forest    | 0   | 0          | 0   | 0   | 0   | 1   | 0   | 12  | 541 | 0             | 0  | 0  | 0  | 0  | 0.98 |
| 52. Shrubs              | 0   | 0          | 2   | 0   | 0   | 1   | 2   | 4   | 2   | 819           | 1  | 0  | 0  | 0  | 0.99 |

|                       |      |      |      |      |      |      |      |      |      |      |      |      |      |      |      |
|-----------------------|------|------|------|------|------|------|------|------|------|------|------|------|------|------|------|
| 71. Grassland         | 0    | 0    | 0    | 0    | 0    | 1    | 0    | 5    | 0    | 9    | 262  | 0    | 0    | 0    | 0.95 |
| 81. Pasture and Parks | 2    | 0    | 1    | 0    | 0    | 0    | 1    | 0    | 0    | 10   | 0    | 237  | 0    | 0    | 0.94 |
| 82. Cultivated Crops  | 0    | 0    | 0    | 0    | 0    | 2    | 0    | 5    | 1    | 0    | 0    | 0    | 545  | 1    | 0.98 |
| 91. Riparian Forest   | 0    | 0    | 0    | 0    | 0    | 0    | 0    | 14   | 0    | 0    | 0    | 0    | 1    | 262  | 0.95 |
| UA                    | 0.98 | 1.00 | 0.91 | 0.95 | 0.98 | 0.97 | 0.85 | 0.81 | 0.99 | 0.89 | 0.97 | 1.00 | 1.00 | 0.98 |      |

| 2006                    |      | OA = 94.6% |      |      |      |      |      |      |      | Kappa = 0.941 |      |      |      |      |      |  |
|-------------------------|------|------------|------|------|------|------|------|------|------|---------------|------|------|------|------|------|--|
| Classes                 | 11   | 21         | 22   | 23   | 24   | 31   | 32   | 41   | 42   | 52            | 71   | 81   | 82   | 91   | PA   |  |
| 11. Water               | 277  | 0          | 0    | 0    | 0    | 0    | 0    | 0    | 0    | 0             | 0    | 0    | 0    | 0    | 1.00 |  |
| 21. Developed. Roads    | 0    | 274        | 0    | 0    | 0    | 0    | 3    | 0    | 0    | 0             | 0    | 0    | 0    | 0    | 0.99 |  |
| 22. Urban. Low Density  | 0    | 0          | 248  | 8    | 0    | 2    | 2    | 2    | 0    | 14            | 0    | 0    | 0    | 1    | 0.90 |  |
| 23. Urban. Med. Density | 0    | 0          | 19   | 250  | 4    | 0    | 3    | 0    | 0    | 1             | 0    | 0    | 0    | 0    | 0.90 |  |
| 24. Urban. High Density | 4    | 0          | 2    | 5    | 235  | 0    | 31   | 0    | 0    | 0             | 0    | 0    | 0    | 0    | 0.85 |  |
| 31. Barren. Washes      | 0    | 0          | 0    | 0    | 0    | 247  | 0    | 15   | 0    | 7             | 7    | 0    | 0    | 1    | 0.89 |  |
| 32. Barren. Mines       | 0    | 0          | 0    | 0    | 0    | 0    | 229  | 0    | 0    | 48            | 0    | 0    | 0    | 0    | 0.83 |  |
| 41. Deciduous Forest    | 0    | 0          | 0    | 0    | 0    | 1    | 0    | 268  | 0    | 5             | 1    | 0    | 0    | 2    | 0.97 |  |
| 42. Evergreen Forest    | 0    | 0          | 0    | 0    | 0    | 1    | 0    | 12   | 539  | 2             | 0    | 0    | 0    | 0    | 0.97 |  |
| 52. Shrubs              | 0    | 0          | 2    | 0    | 0    | 0    | 5    | 5    | 2    | 814           | 3    | 0    | 0    | 0    | 0.98 |  |
| 71. Grassland           | 0    | 0          | 0    | 0    | 0    | 1    | 0    | 5    | 0    | 1             | 270  | 0    | 0    | 0    | 0.97 |  |
| 81. Pasture and Parks   | 2    | 0          | 1    | 0    | 0    | 0    | 1    | 0    | 0    | 9             | 0    | 238  | 0    | 0    | 0.95 |  |
| 82. Cultivated Crops    | 0    | 0          | 0    | 0    | 0    | 2    | 0    | 4    | 1    | 0             | 0    | 1    | 545  | 1    | 0.98 |  |
| 91. Riparian Forest     | 0    | 0          | 0    | 0    | 0    | 0    | 0    | 14   | 0    | 0             | 0    | 0    | 0    | 263  | 0.95 |  |
| UA                      | 0.98 | 1.00       | 0.91 | 0.95 | 0.98 | 0.97 | 0.84 | 0.82 | 0.99 | 0.90          | 0.96 | 1.00 | 1.00 | 0.98 |      |  |

| 2007                    |      | OA = 94.7% |      |      |      |      |      |      |      | Kappa = 0.942 |      |      |      |      |      |  |
|-------------------------|------|------------|------|------|------|------|------|------|------|---------------|------|------|------|------|------|--|
| Classes                 | 11   | 21         | 22   | 23   | 24   | 31   | 32   | 41   | 42   | 52            | 71   | 81   | 82   | 91   | PA   |  |
| 11. Water               | 277  | 0          | 0    | 0    | 0    | 0    | 0    | 0    | 0    | 0             | 0    | 0    | 0    | 0    | 1.00 |  |
| 21. Developed. Roads    | 0    | 274        | 0    | 0    | 0    | 0    | 3    | 0    | 0    | 0             | 0    | 0    | 0    | 0    | 0.99 |  |
| 22. Urban. Low Density  | 0    | 0          | 246  | 10   | 0    | 1    | 2    | 2    | 0    | 15            | 0    | 0    | 0    | 1    | 0.89 |  |
| 23. Urban. Med. Density | 0    | 0          | 18   | 252  | 4    | 0    | 2    | 0    | 0    | 1             | 0    | 0    | 0    | 0    | 0.91 |  |
| 24. Urban. High Density | 3    | 0          | 1    | 5    | 236  | 0    | 32   | 0    | 0    | 0             | 0    | 0    | 0    | 0    | 0.85 |  |
| 31. Barren. Washes      | 0    | 0          | 0    | 0    | 0    | 247  | 0    | 15   | 0    | 7             | 7    | 0    | 0    | 1    | 0.89 |  |
| 32. Barren. Mines       | 0    | 0          | 0    | 0    | 0    | 0    | 231  | 0    | 0    | 46            | 0    | 0    | 0    | 0    | 0.83 |  |
| 41. Deciduous Forest    | 0    | 0          | 0    | 0    | 0    | 1    | 0    | 264  | 0    | 7             | 1    | 0    | 1    | 3    | 0.95 |  |
| 42. Evergreen Forest    | 0    | 0          | 0    | 0    | 0    | 1    | 0    | 10   | 541  | 2             | 0    | 0    | 0    | 0    | 0.98 |  |
| 52. Shrubs              | 0    | 0          | 2    | 0    | 0    | 0    | 4    | 5    | 2    | 815           | 3    | 0    | 0    | 0    | 0.98 |  |
| 71. Grassland           | 0    | 0          | 0    | 0    | 0    | 1    | 0    | 4    | 0    | 1             | 271  | 0    | 0    | 0    | 0.98 |  |
| 81. Pasture and Parks   | 2    | 0          | 1    | 0    | 0    | 0    | 2    | 0    | 0    | 8             | 0    | 238  | 0    | 0    | 0.95 |  |
| 82. Cultivated Crops    | 0    | 0          | 0    | 0    | 0    | 2    | 0    | 4    | 1    | 0             | 0    | 2    | 544  | 1    | 0.98 |  |
| 91. Riparian Forest     | 0    | 0          | 0    | 0    | 0    | 0    | 0    | 13   | 0    | 0             | 0    | 0    | 0    | 264  | 0.95 |  |
| UA                      | 0.98 | 1.00       | 0.92 | 0.94 | 0.98 | 0.98 | 0.84 | 0.83 | 0.99 | 0.90          | 0.96 | 0.99 | 1.00 | 0.98 |      |  |

| 2008                    |     | OA = 94.7% |     |     |     |     |     |    |    | Kappa = 0.942 |    |    |    |    |      |  |
|-------------------------|-----|------------|-----|-----|-----|-----|-----|----|----|---------------|----|----|----|----|------|--|
| Classes                 | 11  | 21         | 22  | 23  | 24  | 31  | 32  | 41 | 42 | 52            | 71 | 81 | 82 | 91 | PA   |  |
| 11. Water               | 277 | 0          | 0   | 0   | 0   | 0   | 0   | 0  | 0  | 0             | 0  | 0  | 0  | 0  | 1.00 |  |
| 21. Developed. Roads    | 0   | 274        | 0   | 0   | 0   | 0   | 3   | 0  | 0  | 0             | 0  | 0  | 0  | 0  | 0.99 |  |
| 22. Urban. Low Density  | 0   | 0          | 248 | 9   | 0   | 1   | 2   | 2  | 0  | 14            | 0  | 0  | 0  | 1  | 0.90 |  |
| 23. Urban. Med. Density | 0   | 0          | 15  | 259 | 2   | 0   | 0   | 0  | 0  | 1             | 0  | 0  | 0  | 0  | 0.94 |  |
| 24. Urban. High Density | 3   | 0          | 1   | 5   | 236 | 0   | 32  | 0  | 0  | 0             | 0  | 0  | 0  | 0  | 0.85 |  |
| 31. Barren. Washes      | 0   | 0          | 0   | 0   | 0   | 247 | 0   | 15 | 0  | 7             | 7  | 0  | 0  | 1  | 0.89 |  |
| 32. Barren. Mines       | 0   | 0          | 0   | 0   | 0   | 0   | 230 | 0  | 0  | 47            | 0  | 0  | 0  | 0  | 0.83 |  |

|                       |    |      |      |      |      |      |      |      |      |      |      |      |      |      |      |
|-----------------------|----|------|------|------|------|------|------|------|------|------|------|------|------|------|------|
| 41. Deciduous Forest  | 0  | 0    | 0    | 0    | 0    | 1    | 0    | 264  | 0    | 8    | 1    | 0    | 1    | 2    | 0.95 |
| 42. Evergreen Forest  | 0  | 0    | 0    | 0    | 0    | 1    | 0    | 8    | 539  | 6    | 0    | 0    | 0    | 0    | 0.97 |
| 52. Shrubs            | 0  | 0    | 2    | 0    | 0    | 2    | 3    | 5    | 2    | 815  | 2    | 0    | 0    | 0    | 0.98 |
| 71. Grassland         | 0  | 0    | 0    | 0    | 0    | 1    | 0    | 6    | 0    | 3    | 267  | 0    | 0    | 0    | 0.96 |
| 81. Pasture and Parks | 2  | 0    | 1    | 0    | 0    | 0    | 1    | 0    | 0    | 9    | 0    | 238  | 0    | 0    | 0.95 |
| 82. Cultivated Crops  | 0  | 0    | 0    | 0    | 0    | 1    | 0    | 5    | 2    | 0    | 0    | 2    | 543  | 1    | 0.98 |
| 91. Riparian Forest   | 0  | 0    | 0    | 0    | 0    | 0    | 0    | 13   | 0    | 0    | 0    | 0    | 0    | 264  | 0.95 |
|                       | UA | 0.98 | 1.00 | 0.93 | 0.95 | 0.99 | 0.97 | 0.85 | 0.83 | 0.99 | 0.90 | 0.96 | 0.99 | 1.00 | 0.98 |

| 2009                    | OA = 94.9% |      |      |      |      |      |      |      | Kappa = 0.944 |      |      |      |      |      |      |
|-------------------------|------------|------|------|------|------|------|------|------|---------------|------|------|------|------|------|------|
| Classes                 | 11         | 21   | 22   | 23   | 24   | 31   | 32   | 41   | 42            | 52   | 71   | 81   | 82   | 91   | PA   |
| 11. Water               | 277        | 0    | 0    | 0    | 0    | 0    | 0    | 0    | 0             | 0    | 0    | 0    | 0    | 0    | 1.00 |
| 21. Developed. Roads    | 0          | 274  | 0    | 0    | 0    | 0    | 3    | 0    | 0             | 0    | 0    | 0    | 0    | 0    | 0.99 |
| 22. Urban. Low Density  | 0          | 0    | 248  | 9    | 0    | 1    | 2    | 2    | 0             | 14   | 0    | 0    | 0    | 1    | 0.90 |
| 23. Urban. Med. Density | 0          | 0    | 16   | 259  | 1    | 0    | 0    | 0    | 0             | 1    | 0    | 0    | 0    | 0    | 0.94 |
| 24. Urban. High Density | 3          | 0    | 1    | 6    | 235  | 0    | 32   | 0    | 0             | 0    | 0    | 0    | 0    | 0    | 0.85 |
| 31. Barren. Washes      | 0          | 0    | 0    | 0    | 0    | 245  | 0    | 22   | 0             | 6    | 3    | 0    | 0    | 1    | 0.88 |
| 32. Barren. Mines       | 0          | 0    | 0    | 0    | 0    | 0    | 237  | 0    | 0             | 40   | 0    | 0    | 0    | 0    | 0.86 |
| 41. Deciduous Forest    | 0          | 0    | 0    | 0    | 0    | 1    | 0    | 268  | 0             | 5    | 1    | 0    | 1    | 1    | 0.97 |
| 42. Evergreen Forest    | 0          | 0    | 0    | 0    | 0    | 1    | 0    | 8    | 540           | 5    | 0    | 0    | 0    | 0    | 0.97 |
| 52. Shrubs              | 0          | 0    | 2    | 0    | 0    | 2    | 3    | 6    | 2             | 812  | 4    | 0    | 0    | 0    | 0.98 |
| 71. Grassland           | 0          | 0    | 0    | 0    | 0    | 1    | 0    | 6    | 0             | 3    | 267  | 0    | 0    | 0    | 0.96 |
| 81. Pasture and Parks   | 2          | 0    | 1    | 0    | 0    | 0    | 1    | 0    | 0             | 9    | 0    | 238  | 0    | 0    | 0.95 |
| 82. Cultivated Crops    | 0          | 0    | 0    | 0    | 0    | 1    | 0    | 5    | 2             | 0    | 0    | 2    | 543  | 1    | 0.98 |
| 91. Riparian Forest     | 0          | 0    | 0    | 0    | 0    | 0    | 0    | 11   | 0             | 0    | 0    | 0    | 1    | 265  | 0.96 |
|                         | UA 0.98    | 1.00 | 0.93 | 0.95 | 1.00 | 0.97 | 0.85 | 0.82 | 0.99          | 0.91 | 0.97 | 0.99 | 1.00 | 0.99 |      |

| 2010                    | OA = 95.4% |      |      |      |      |      |      |      |      | Kappa = 0.950 |      |      |      |      |      |
|-------------------------|------------|------|------|------|------|------|------|------|------|---------------|------|------|------|------|------|
| Classes                 | 11         | 21   | 22   | 23   | 24   | 31   | 32   | 41   | 42   | 52            | 71   | 81   | 82   | 91   | PA   |
| 11. Water               | 277        | 0    | 0    | 0    | 0    | 0    | 0    | 0    | 0    | 0             | 0    | 0    | 0    | 0    | 1.00 |
| 21. Developed. Roads    | 0          | 274  | 0    | 0    | 0    | 0    | 3    | 0    | 0    | 0             | 0    | 0    | 0    | 0    | 0.99 |
| 22. Urban. Low Density  | 0          | 0    | 253  | 5    | 0    | 1    | 2    | 2    | 0    | 13            | 0    | 0    | 0    | 1    | 0.91 |
| 23. Urban. Med. Density | 0          | 0    | 18   | 259  | 0    | 0    | 0    | 0    | 0    | 0             | 0    | 0    | 0    | 0    | 0.94 |
| 24. Urban. High Density | 3          | 0    | 1    | 6    | 235  | 0    | 32   | 0    | 0    | 0             | 0    | 0    | 0    | 0    | 0.85 |
| 31. Barren. Washes      | 0          | 0    | 0    | 0    | 0    | 250  | 0    | 19   | 0    | 6             | 0    | 0    | 0    | 2    | 0.90 |
| 32. Barren. Mines       | 0          | 0    | 0    | 0    | 0    | 0    | 247  | 0    | 0    | 30            | 0    | 0    | 0    | 0    | 0.89 |
| 41. Deciduous Forest    | 0          | 0    | 0    | 0    | 0    | 1    | 0    | 270  | 0    | 4             | 0    | 0    | 1    | 1    | 0.97 |
| 42. Evergreen Forest    | 0          | 0    | 0    | 0    | 0    | 1    | 0    | 11   | 538  | 4             | 0    | 0    | 0    | 0    | 0.97 |
| 52. Shrubs              | 0          | 0    | 2    | 0    | 0    | 1    | 4    | 6    | 1    | 813           | 4    | 0    | 0    | 0    | 0.98 |
| 71. Grassland           | 0          | 0    | 0    | 0    | 0    | 1    | 0    | 7    | 0    | 2             | 267  | 0    | 0    | 0    | 0.96 |
| 81. Pasture and Parks   | 1          | 0    | 1    | 0    | 0    | 0    | 1    | 0    | 0    | 7             | 0    | 241  | 0    | 0    | 0.96 |
| 82. Cultivated Crops    | 0          | 0    | 0    | 0    | 0    | 1    | 0    | 5    | 0    | 0             | 0    | 1    | 547  | 0    | 0.99 |
| 91. Riparian Forest     | 0          | 0    | 0    | 0    | 0    | 0    | 0    | 12   | 0    | 0             | 0    | 0    | 1    | 264  | 0.95 |
|                         | UA 0.99    | 1.00 | 0.92 | 0.96 | 1.00 | 0.98 | 0.85 | 0.81 | 1.00 | 0.92          | 0.99 | 1.00 | 1.00 | 0.99 |      |

[illegible]

|                         |      |      |      |      |      |      |      |      |      |      |      |      |      |      |      |
|-------------------------|------|------|------|------|------|------|------|------|------|------|------|------|------|------|------|
| 24. Urban. High Density | 1    | 0    | 2    | 5    | 243  | 0    | 26   | 0    | 0    | 0    | 0    | 0    | 0    | 0    | 0.88 |
| 31. Barren. Washes      | 0    | 0    | 0    | 0    | 0    | 258  | 0    | 11   | 0    | 6    | 0    | 0    | 0    | 2    | 0.93 |
| 32. Barren. Mines       | 0    | 0    | 0    | 0    | 1    | 0    | 249  | 0    | 0    | 27   | 0    | 0    | 0    | 0    | 0.90 |
| 41. Deciduous Forest    | 0    | 0    | 0    | 0    | 0    | 1    | 0    | 269  | 0    | 6    | 0    | 0    | 0    | 1    | 0.97 |
| 42. Evergreen Forest    | 0    | 0    | 0    | 0    | 0    | 1    | 0    | 11   | 540  | 2    | 0    | 0    | 0    | 0    | 0.97 |
| 52. Shrubs              | 0    | 0    | 2    | 0    | 0    | 0    | 4    | 7    | 0    | 818  | 0    | 0    | 0    | 0    | 0.98 |
| 71. Grassland           | 0    | 0    | 0    | 0    | 0    | 1    | 0    | 9    | 0    | 2    | 265  | 0    | 0    | 0    | 0.96 |
| 81. Pasture and Parks   | 1    | 0    | 1    | 0    | 0    | 0    | 0    | 0    | 0    | 0    | 0    | 249  | 0    | 0    | 0.99 |
| 82. Cultivated Crops    | 0    | 0    | 0    | 0    | 0    | 0    | 0    | 6    | 0    | 0    | 0    | 1    | 547  | 0    | 0.99 |
| 91. Riparian Forest     | 0    | 0    | 0    | 0    | 0    | 0    | 0    | 11   | 0    | 0    | 0    | 0    | 0    | 266  | 0.96 |
| UA                      | 0.99 | 1.00 | 0.91 | 0.97 | 1.00 | 0.98 | 0.88 | 0.83 | 1.00 | 0.94 | 1.00 | 1.00 | 1.00 | 1.00 | 0.99 |

| 2013                    | OA = 95.8% |      |      |      |      |      |      |      | Kappa = 0.954 |      |      |      |      |      |      |
|-------------------------|------------|------|------|------|------|------|------|------|---------------|------|------|------|------|------|------|
| Classes                 | 11         | 21   | 22   | 23   | 24   | 31   | 32   | 41   | 42            | 52   | 71   | 81   | 82   | 91   | PA   |
| 11. Water               | 277        | 0    | 0    | 0    | 0    | 0    | 0    | 0    | 0             | 0    | 0    | 0    | 0    | 0    | 1.00 |
| 21. Developed. Roads    | 0          | 274  | 0    | 0    | 0    | 0    | 3    | 0    | 0             | 0    | 0    | 0    | 0    | 0    | 0.99 |
| 22. Urban. Low Density  | 0          | 0    | 254  | 4    | 0    | 1    | 2    | 2    | 0             | 13   | 0    | 0    | 0    | 1    | 0.92 |
| 23. Urban. Med. Density | 0          | 0    | 18   | 257  | 2    | 0    | 0    | 0    | 0             | 0    | 0    | 0    | 0    | 0    | 0.93 |
| 24. Urban. High Density | 1          | 0    | 1    | 5    | 244  | 0    | 26   | 0    | 0             | 0    | 0    | 0    | 0    | 0    | 0.88 |
| 31. Barren. Washes      | 0          | 0    | 0    | 0    | 0    | 261  | 0    | 9    | 0             | 5    | 0    | 0    | 0    | 2    | 0.94 |
| 32. Barren. Mines       | 0          | 0    | 1    | 0    | 1    | 0    | 243  | 0    | 0             | 32   | 0    | 0    | 0    | 0    | 0.88 |
| 41. Deciduous Forest    | 0          | 0    | 0    | 0    | 0    | 9    | 0    | 259  | 0             | 6    | 0    | 0    | 0    | 3    | 0.94 |
| 42. Evergreen Forest    | 0          | 0    | 0    | 0    | 0    | 1    | 0    | 6    | 545           | 2    | 0    | 0    | 0    | 0    | 0.98 |
| 52. Shrubs              | 0          | 0    | 2    | 0    | 0    | 1    | 2    | 7    | 1             | 818  | 0    | 0    | 0    | 0    | 0.98 |
| 71. Grassland           | 0          | 0    | 0    | 0    | 0    | 1    | 0    | 10   | 0             | 2    | 264  | 0    | 0    | 0    | 0.95 |
| 81. Pasture and Parks   | 1          | 0    | 1    | 0    | 1    | 0    | 0    | 0    | 0             | 0    | 0    | 248  | 0    | 0    | 0.99 |
| 82. Cultivated Crops    | 0          | 0    | 0    | 0    | 0    | 0    | 0    | 5    | 0             | 0    | 0    | 5    | 544  | 0    | 0.98 |
| 91. Riparian Forest     | 0          | 0    | 0    | 0    | 0    | 0    | 0    | 10   | 0             | 0    | 0    | 0    | 0    | 267  | 0.96 |
|                         | UA         | 0.99 | 1.00 | 0.92 | 0.97 | 0.98 | 0.95 | 0.88 | 0.84          | 1.00 | 0.93 | 1.00 | 0.98 | 1.00 | 0.98 |

| 2014                    | OA = 96.1% |      |      |      |      |      |      |      |      | Kappa = 0.958 |      |      |      |      |      |
|-------------------------|------------|------|------|------|------|------|------|------|------|---------------|------|------|------|------|------|
| Classes                 | 11         | 21   | 22   | 23   | 24   | 31   | 32   | 41   | 42   | 52            | 71   | 81   | 82   | 91   | PA   |
| 11. Water               | 277        | 0    | 0    | 0    | 0    | 0    | 0    | 0    | 0    | 0             | 0    | 0    | 0    | 0    | 1.00 |
| 21. Developed. Roads    | 0          | 274  | 0    | 0    | 0    | 0    | 3    | 0    | 0    | 0             | 0    | 0    | 0    | 0    | 0.99 |
| 22. Urban. Low Density  | 0          | 0    | 255  | 4    | 0    | 2    | 2    | 2    | 0    | 11            | 0    | 0    | 0    | 1    | 0.92 |
| 23. Urban. Med. Density | 0          | 0    | 20   | 255  | 2    | 0    | 0    | 0    | 0    | 0             | 0    | 0    | 0    | 0    | 0.92 |
| 24. Urban. High Density | 1          | 0    | 1    | 6    | 247  | 0    | 22   | 0    | 0    | 0             | 0    | 0    | 0    | 0    | 0.89 |
| 31. Barren. Washes      | 0          | 0    | 0    | 0    | 0    | 265  | 0    | 6    | 0    | 4             | 0    | 0    | 0    | 2    | 0.96 |
| 32. Barren. Mines       | 0          | 0    | 1    | 0    | 1    | 0    | 241  | 0    | 0    | 34            | 0    | 0    | 0    | 0    | 0.87 |
| 41. Deciduous Forest    | 0          | 0    | 0    | 0    | 0    | 9    | 0    | 260  | 0    | 5             | 0    | 0    | 0    | 3    | 0.94 |
| 42. Evergreen Forest    | 0          | 0    | 0    | 0    | 0    | 1    | 0    | 6    | 545  | 2             | 0    | 0    | 0    | 0    | 0.98 |
| 52. Shrubs              | 0          | 0    | 2    | 0    | 0    | 1    | 0    | 4    | 1    | 823           | 0    | 0    | 0    | 0    | 0.99 |
| 71. Grassland           | 0          | 0    | 0    | 0    | 0    | 1    | 0    | 10   | 0    | 0             | 266  | 0    | 0    | 0    | 0.96 |
| 81. Pasture and Parks   | 1          | 0    | 1    | 0    | 1    | 0    | 0    | 0    | 0    | 0             | 0    | 248  | 0    | 0    | 0.99 |
| 82. Cultivated Crops    | 0          | 0    | 0    | 0    | 0    | 0    | 0    | 5    | 0    | 0             | 0    | 5    | 544  | 0    | 0.98 |
| 91. Riparian Forest     | 0          | 0    | 0    | 0    | 0    | 0    | 0    | 7    | 0    | 0             | 0    | 0    | 0    | 270  | 0.97 |
|                         | UA 0.99    | 1.00 | 0.91 | 0.96 | 0.98 | 0.95 | 0.90 | 0.87 | 1.00 | 0.94          | 1.00 | 0.98 | 1.00 | 0.98 |      |

[illegible]

|                         |      |      |      |      |      |      |      |      |      |      |      |      |      |      |      |
|-------------------------|------|------|------|------|------|------|------|------|------|------|------|------|------|------|------|
| 21. Developed. Roads    | 0    | 274  | 0    | 0    | 0    | 0    | 3    | 0    | 0    | 0    | 0    | 0    | 0    | 0    | 0.99 |
| 22. Urban. Low Density  | 0    | 0    | 254  | 6    | 0    | 3    | 2    | 2    | 0    | 10   | 0    | 0    | 0    | 0    | 0.92 |
| 23. Urban. Med. Density | 0    | 0    | 19   | 255  | 3    | 0    | 0    | 0    | 0    | 0    | 0    | 0    | 0    | 0    | 0.92 |
| 24. Urban. High Density | 5    | 0    | 2    | 9    | 247  | 0    | 14   | 0    | 0    | 0    | 0    | 0    | 0    | 0    | 0.89 |
| 31. Barren. Washes      | 0    | 0    | 0    | 0    | 0    | 268  | 0    | 5    | 0    | 4    | 0    | 0    | 0    | 0    | 0.97 |
| 32. Barren. Mines       | 0    | 0    | 1    | 0    | 1    | 0    | 246  | 0    | 0    | 29   | 0    | 0    | 0    | 0    | 0.89 |
| 41. Deciduous Forest    | 0    | 0    | 0    | 0    | 0    | 4    | 0    | 263  | 0    | 5    | 0    | 0    | 3    | 2    | 0.95 |
| 42. Evergreen Forest    | 0    | 0    | 0    | 0    | 0    | 1    | 0    | 9    | 542  | 2    | 0    | 0    | 0    | 0    | 0.98 |
| 52. Shrubs              | 0    | 0    | 2    | 0    | 0    | 0    | 0    | 1    | 1    | 827  | 0    | 0    | 0    | 0    | 1.00 |
| 71. Grassland           | 0    | 0    | 0    | 0    | 0    | 1    | 0    | 14   | 0    | 3    | 259  | 0    | 0    | 0    | 0.94 |
| 81. Pasture and Parks   | 1    | 0    | 1    | 0    | 1    | 0    | 0    | 0    | 0    | 0    | 0    | 248  | 0    | 0    | 0.99 |
| 82. Cultivated Crops    | 0    | 0    | 0    | 0    | 0    | 0    | 0    | 4    | 0    | 0    | 0    | 5    | 545  | 0    | 0.98 |
| 91. Riparian Forest     | 0    | 0    | 0    | 0    | 0    | 0    | 0    | 6    | 0    | 0    | 0    | 0    | 0    | 271  | 0.98 |
| UA                      | 0.98 | 1.00 | 0.91 | 0.94 | 0.98 | 0.97 | 0.93 | 0.87 | 1.00 | 0.94 | 1.00 | 0.98 | 0.99 | 0.99 |      |

| 2016                    |      | OA = 96.3% |      |      |      |      |      |      |      | Kappa = 0.959 |      |      |      |      |      |  |
|-------------------------|------|------------|------|------|------|------|------|------|------|---------------|------|------|------|------|------|--|
| Classes                 | 11   | 21         | 22   | 23   | 24   | 31   | 32   | 41   | 42   | 52            | 71   | 81   | 82   | 91   | PA   |  |
| 11. Water               | 277  | 0          | 0    | 0    | 0    | 0    | 0    | 0    | 0    | 0             | 0    | 0    | 0    | 0    | 1.00 |  |
| 21. Developed. Roads    | 0    | 277        | 0    | 0    | 0    | 0    | 0    | 0    | 0    | 0             | 0    | 0    | 0    | 0    | 1.00 |  |
| 22. Urban. Low Density  | 0    | 0          | 255  | 5    | 1    | 3    | 2    | 2    | 0    | 9             | 0    | 0    | 0    | 0    | 0.92 |  |
| 23. Urban. Med. Density | 0    | 0          | 22   | 253  | 2    | 0    | 0    | 0    | 0    | 0             | 0    | 0    | 0    | 0    | 0.91 |  |
| 24. Urban. High Density | 10   | 0          | 2    | 9    | 248  | 0    | 8    | 0    | 0    | 0             | 0    | 0    | 0    | 0    | 0.90 |  |
| 31. Barren. Washes      | 0    | 0          | 0    | 0    | 0    | 271  | 0    | 3    | 0    | 3             | 0    | 0    | 0    | 0    | 0.98 |  |
| 32. Barren. Mines       | 0    | 0          | 1    | 0    | 1    | 0    | 245  | 0    | 0    | 30            | 0    | 0    | 0    | 0    | 0.88 |  |
| 41. Deciduous Forest    | 0    | 0          | 0    | 0    | 0    | 4    | 0    | 266  | 0    | 3             | 0    | 0    | 3    | 1    | 0.96 |  |
| 42. Evergreen Forest    | 0    | 0          | 0    | 0    | 0    | 1    | 0    | 9    | 543  | 1             | 0    | 0    | 0    | 0    | 0.98 |  |
| 52. Shrubs              | 0    | 0          | 4    | 0    | 0    | 1    | 0    | 2    | 1    | 823           | 0    | 0    | 0    | 0    | 0.99 |  |
| 71. Grassland           | 0    | 0          | 0    | 0    | 0    | 1    | 0    | 12   | 0    | 5             | 259  | 0    | 0    | 0    | 0.94 |  |
| 81. Pasture and Parks   | 0    | 0          | 1    | 0    | 1    | 0    | 0    | 0    | 0    | 0             | 0    | 249  | 0    | 0    | 0.99 |  |
| 82. Cultivated Crops    | 0    | 0          | 0    | 0    | 0    | 0    | 0    | 4    | 0    | 0             | 0    | 7    | 543  | 0    | 0.98 |  |
| 91. Riparian Forest     | 0    | 0          | 0    | 0    | 0    | 0    | 0    | 6    | 0    | 0             | 0    | 0    | 3    | 268  | 0.97 |  |
| UA                      | 0.97 | 1.00       | 0.89 | 0.95 | 0.98 | 0.96 | 0.96 | 0.88 | 1.00 | 0.94          | 1.00 | 0.97 | 0.99 | 1.00 |      |  |

| 2017                    |      | OA = 96.3% |      |      |      |      |      |      |      | Kappa = 0.959 |      |      |      |      |      |  |
|-------------------------|------|------------|------|------|------|------|------|------|------|---------------|------|------|------|------|------|--|
| Classes                 | 11   | 21         | 22   | 23   | 24   | 31   | 32   | 41   | 42   | 52            | 71   | 81   | 82   | 91   | PA   |  |
| 11. Water               | 277  | 0          | 0    | 0    | 0    | 0    | 0    | 0    | 0    | 0             | 0    | 0    | 0    | 0    | 1.00 |  |
| 21. Developed. Roads    | 0    | 277        | 0    | 0    | 0    | 0    | 0    | 0    | 0    | 0             | 0    | 0    | 0    | 0    | 1.00 |  |
| 22. Urban. Low Density  | 0    | 0          | 255  | 5    | 1    | 3    | 2    | 3    | 0    | 8             | 0    | 0    | 0    | 0    | 0.92 |  |
| 23. Urban. Med. Density | 0    | 0          | 28   | 248  | 1    | 0    | 0    | 0    | 0    | 0             | 0    | 0    | 0    | 0    | 0.90 |  |
| 24. Urban. High Density | 9    | 0          | 3    | 9    | 253  | 0    | 3    | 0    | 0    | 0             | 0    | 0    | 0    | 0    | 0.91 |  |
| 31. Barren. Washes      | 0    | 0          | 0    | 0    | 0    | 270  | 0    | 4    | 0    | 3             | 0    | 0    | 0    | 0    | 0.97 |  |
| 32. Barren. Mines       | 0    | 0          | 1    | 0    | 1    | 1    | 245  | 0    | 0    | 29            | 0    | 0    | 0    | 0    | 0.88 |  |
| 41. Deciduous Forest    | 0    | 0          | 1    | 0    | 0    | 2    | 0    | 272  | 0    | 1             | 0    | 0    | 0    | 1    | 0.98 |  |
| 42. Evergreen Forest    | 0    | 0          | 0    | 0    | 0    | 1    | 0    | 9    | 543  | 1             | 0    | 0    | 0    | 0    | 0.98 |  |
| 52. Shrubs              | 0    | 0          | 4    | 0    | 0    | 1    | 0    | 2    | 1    | 823           | 0    | 0    | 0    | 0    | 0.99 |  |
| 71. Grassland           | 0    | 0          | 0    | 0    | 0    | 1    | 0    | 11   | 0    | 7             | 258  | 0    | 0    | 0    | 0.93 |  |
| 81. Pasture and Parks   | 0    | 0          | 1    | 0    | 1    | 0    | 0    | 0    | 0    | 0             | 0    | 249  | 0    | 0    | 0.99 |  |
| 82. Cultivated Crops    | 0    | 0          | 0    | 0    | 0    | 0    | 0    | 4    | 0    | 0             | 0    | 6    | 544  | 0    | 0.98 |  |
| 91. Riparian Forest     | 0    | 0          | 0    | 0    | 0    | 0    | 0    | 7    | 0    | 0             | 0    | 0    | 3    | 267  | 0.96 |  |
| UA                      | 0.97 | 1.00       | 0.87 | 0.95 | 0.98 | 0.97 | 0.98 | 0.87 | 1.00 | 0.94          | 1.00 | 0.98 | 0.99 | 1.00 |      |  |



| 2018                    | OA = 96.3% |      |      |      |      |      |      |      |      | Kappa = 0.960 |      |      |      |      |      |
|-------------------------|------------|------|------|------|------|------|------|------|------|---------------|------|------|------|------|------|
| Classes                 | 11         | 21   | 22   | 23   | 24   | 31   | 32   | 41   | 42   | 52            | 71   | 81   | 82   | 91   | PA   |
| 11. Water               | 277        | 0    | 0    | 0    | 0    | 0    | 0    | 0    | 0    | 0             | 0    | 0    | 0    | 0    | 1.00 |
| 21. Developed. Roads    | 0          | 277  | 0    | 0    | 0    | 0    | 0    | 0    | 0    | 0             | 0    | 0    | 0    | 0    | 1.00 |
| 22. Urban. Low Density  | 0          | 0    | 256  | 5    | 0    | 3    | 2    | 3    | 0    | 8             | 0    | 0    | 0    | 0    | 0.92 |
| 23. Urban. Med. Density | 0          | 0    | 28   | 247  | 2    | 0    | 0    | 0    | 0    | 0             | 0    | 0    | 0    | 0    | 0.89 |
| 24. Urban. High Density | 1          | 0    | 4    | 9    | 260  | 0    | 3    | 0    | 0    | 0             | 0    | 0    | 0    | 0    | 0.94 |
| 31. Barren. Washes      | 0          | 0    | 0    | 0    | 0    | 269  | 0    | 5    | 0    | 3             | 0    | 0    | 0    | 0    | 0.97 |
| 32. Barren. Mines       | 1          | 0    | 1    | 0    | 1    | 1    | 244  | 0    | 0    | 29            | 0    | 0    | 0    | 0    | 0.88 |
| 41. Deciduous Forest    | 0          | 0    | 1    | 0    | 0    | 3    | 0    | 271  | 0    | 2             | 0    | 0    | 0    | 0    | 0.98 |
| 42. Evergreen Forest    | 0          | 0    | 0    | 0    | 0    | 1    | 0    | 9    | 542  | 2             | 0    | 0    | 0    | 0    | 0.98 |
| 52. Shrubs              | 0          | 0    | 4    | 0    | 0    | 1    | 0    | 3    | 0    | 823           | 0    | 0    | 0    | 0    | 0.99 |
| 71. Grassland           | 0          | 0    | 0    | 0    | 0    | 1    | 0    | 11   | 0    | 8             | 257  | 0    | 0    | 0    | 0.93 |
| 81. Pasture and Parks   | 0          | 0    | 2    | 0    | 1    | 0    | 0    | 0    | 0    | 0             | 0    | 248  | 0    | 0    | 0.99 |
| 82. Cultivated Crops    | 0          | 0    | 0    | 0    | 0    | 0    | 0    | 4    | 0    | 0             | 0    | 8    | 542  | 0    | 0.98 |
| 91. Riparian Forest     | 0          | 0    | 0    | 0    | 0    | 0    | 0    | 10   | 0    | 0             | 0    | 0    | 1    | 266  | 0.96 |
| UA                      | 0.99       | 1.00 | 0.86 | 0.95 | 0.98 | 0.96 | 0.98 | 0.86 | 1.00 | 0.94          | 1.00 | 0.97 | 1.00 | 1.00 |      |

| 2019                    | OA = 96.4% |      |      |      |      |      |      |      |      | Kappa = 0.960 |      |      |      |      |      |
|-------------------------|------------|------|------|------|------|------|------|------|------|---------------|------|------|------|------|------|
| Classes                 | 11         | 21   | 22   | 23   | 24   | 31   | 32   | 41   | 42   | 52            | 71   | 81   | 82   | 91   | PA   |
| 11. Water               | 277        | 0    | 0    | 0    | 0    | 0    | 0    | 0    | 0    | 0             | 0    | 0    | 0    | 0    | 1.00 |
| 21. Developed. Roads    | 0          | 277  | 0    | 0    | 0    | 0    | 0    | 0    | 0    | 0             | 0    | 0    | 0    | 0    | 1.00 |
| 22. Urban. Low Density  | 0          | 0    | 258  | 4    | 0    | 3    | 2    | 2    | 0    | 8             | 0    | 0    | 0    | 0    | 0.93 |
| 23. Urban. Med. Density | 0          | 0    | 21   | 253  | 3    | 0    | 0    | 0    | 0    | 0             | 0    | 0    | 0    | 0    | 0.91 |
| 24. Urban. High Density | 0          | 0    | 4    | 6    | 264  | 0    | 2    | 0    | 0    | 1             | 0    | 0    | 0    | 0    | 0.95 |
| 31. Barren. Washes      | 0          | 0    | 2    | 0    | 0    | 267  | 0    | 5    | 0    | 3             | 0    | 0    | 0    | 0    | 0.96 |
| 32. Barren. Mines       | 1          | 0    | 1    | 0    | 1    | 1    | 241  | 0    | 0    | 32            | 0    | 0    | 0    | 0    | 0.87 |
| 41. Deciduous Forest    | 0          | 0    | 1    | 0    | 0    | 3    | 0    | 271  | 0    | 2             | 0    | 0    | 0    | 0    | 0.98 |
| 42. Evergreen Forest    | 0          | 0    | 0    | 0    | 0    | 2    | 0    | 7    | 543  | 2             | 0    | 0    | 0    | 0    | 0.98 |
| 52. Shrubs              | 0          | 0    | 4    | 0    | 0    | 1    | 0    | 2    | 0    | 821           | 3    | 0    | 0    | 0    | 0.99 |
| 71. Grassland           | 0          | 0    | 0    | 0    | 0    | 1    | 0    | 13   | 0    | 8             | 255  | 0    | 0    | 0    | 0.92 |
| 81. Pasture and Parks   | 1          | 0    | 2    | 0    | 1    | 0    | 0    | 0    | 0    | 0             | 0    | 247  | 0    | 0    | 0.98 |
| 82. Cultivated Crops    | 0          | 0    | 0    | 0    | 0    | 0    | 0    | 6    | 0    | 0             | 0    | 8    | 540  | 0    | 0.97 |
| 91. Riparian Forest     | 0          | 0    | 0    | 0    | 0    | 0    | 0    | 9    | 0    | 0             | 0    | 0    | 0    | 268  | 0.97 |
| UA                      | 0.99       | 1.00 | 0.88 | 0.96 | 0.98 | 0.96 | 0.98 | 0.86 | 1.00 | 0.94          | 0.99 | 0.97 | 1.00 | 1.00 |      |

| 2020                    | OA = 96.3% |     |     |     |     |     |     |     |     | Kappa = 0.959 |     |     |     |    |      |
|-------------------------|------------|-----|-----|-----|-----|-----|-----|-----|-----|---------------|-----|-----|-----|----|------|
| Classes                 | 11         | 21  | 22  | 23  | 24  | 31  | 32  | 41  | 42  | 52            | 71  | 81  | 82  | 91 | PA   |
| 11. Water               | 277        | 0   | 0   | 0   | 0   | 0   | 0   | 0   | 0   | 0             | 0   | 0   | 0   | 0  | 1.00 |
| 21. Developed. Roads    | 0          | 277 | 0   | 0   | 0   | 0   | 0   | 0   | 0   | 0             | 0   | 0   | 0   | 0  | 1.00 |
| 22. Urban. Low Density  | 0          | 0   | 261 | 3   | 0   | 3   | 2   | 2   | 0   | 6             | 0   | 0   | 0   | 0  | 0.94 |
| 23. Urban. Med. Density | 0          | 0   | 20  | 253 | 4   | 0   | 0   | 0   | 0   | 0             | 0   | 0   | 0   | 0  | 0.91 |
| 24. Urban. High Density | 0          | 0   | 4   | 7   | 263 | 0   | 2   | 0   | 0   | 1             | 0   | 0   | 0   | 0  | 0.95 |
| 31. Barren. Washes      | 0          | 3   | 2   | 0   | 0   | 261 | 0   | 8   | 0   | 3             | 0   | 0   | 0   | 0  | 0.94 |
| 32. Barren. Mines       | 0          | 0   | 3   | 0   | 1   | 0   | 243 | 0   | 0   | 30            | 0   | 0   | 0   | 0  | 0.88 |
| 41. Deciduous Forest    | 0          | 0   | 1   | 0   | 0   | 2   | 0   | 272 | 0   | 2             | 0   | 0   | 0   | 0  | 0.98 |
| 42. Evergreen Forest    | 0          | 0   | 0   | 0   | 0   | 2   | 0   | 7   | 543 | 2             | 0   | 0   | 0   | 0  | 0.98 |
| 52. Shrubs              | 0          | 0   | 6   | 0   | 0   | 1   | 0   | 2   | 0   | 819           | 3   | 0   | 0   | 0  | 0.99 |
| 71. Grassland           | 0          | 0   | 0   | 0   | 0   | 1   | 0   | 15  | 0   | 10            | 251 | 0   | 0   | 0  | 0.91 |
| 81. Pasture and Parks   | 1          | 0   | 2   | 0   | 1   | 0   | 0   | 0   | 0   | 0             | 0   | 247 | 0   | 0  | 0.98 |
| 82. Cultivated Crops    | 0          | 0   | 0   | 0   | 0   | 0   | 0   | 6   | 0   | 0             | 0   | 3   | 545 | 0  | 0.98 |

|                     |      |      |      |      |      |      |      |      |      |      |      |      |      |      |      |
|---------------------|------|------|------|------|------|------|------|------|------|------|------|------|------|------|------|
| 91. Riparian Forest | 0    | 0    | 0    | 0    | 0    | 0    | 0    | 11   | 0    | 0    | 0    | 0    | 0    | 266  | 0.96 |
| UA                  | 1.00 | 0.99 | 0.87 | 0.96 | 0.98 | 0.97 | 0.98 | 0.84 | 1.00 | 0.94 | 0.99 | 0.99 | 1.00 | 1.00 |      |

**Figure S1.** Maps of yearly land cover classifications results (1986–2020). Note: 2012 was not treated due to a lack of good quality data because of Landsat 7 issues and the delayed launch of Landsat 8 from July 2011 to February 2013.

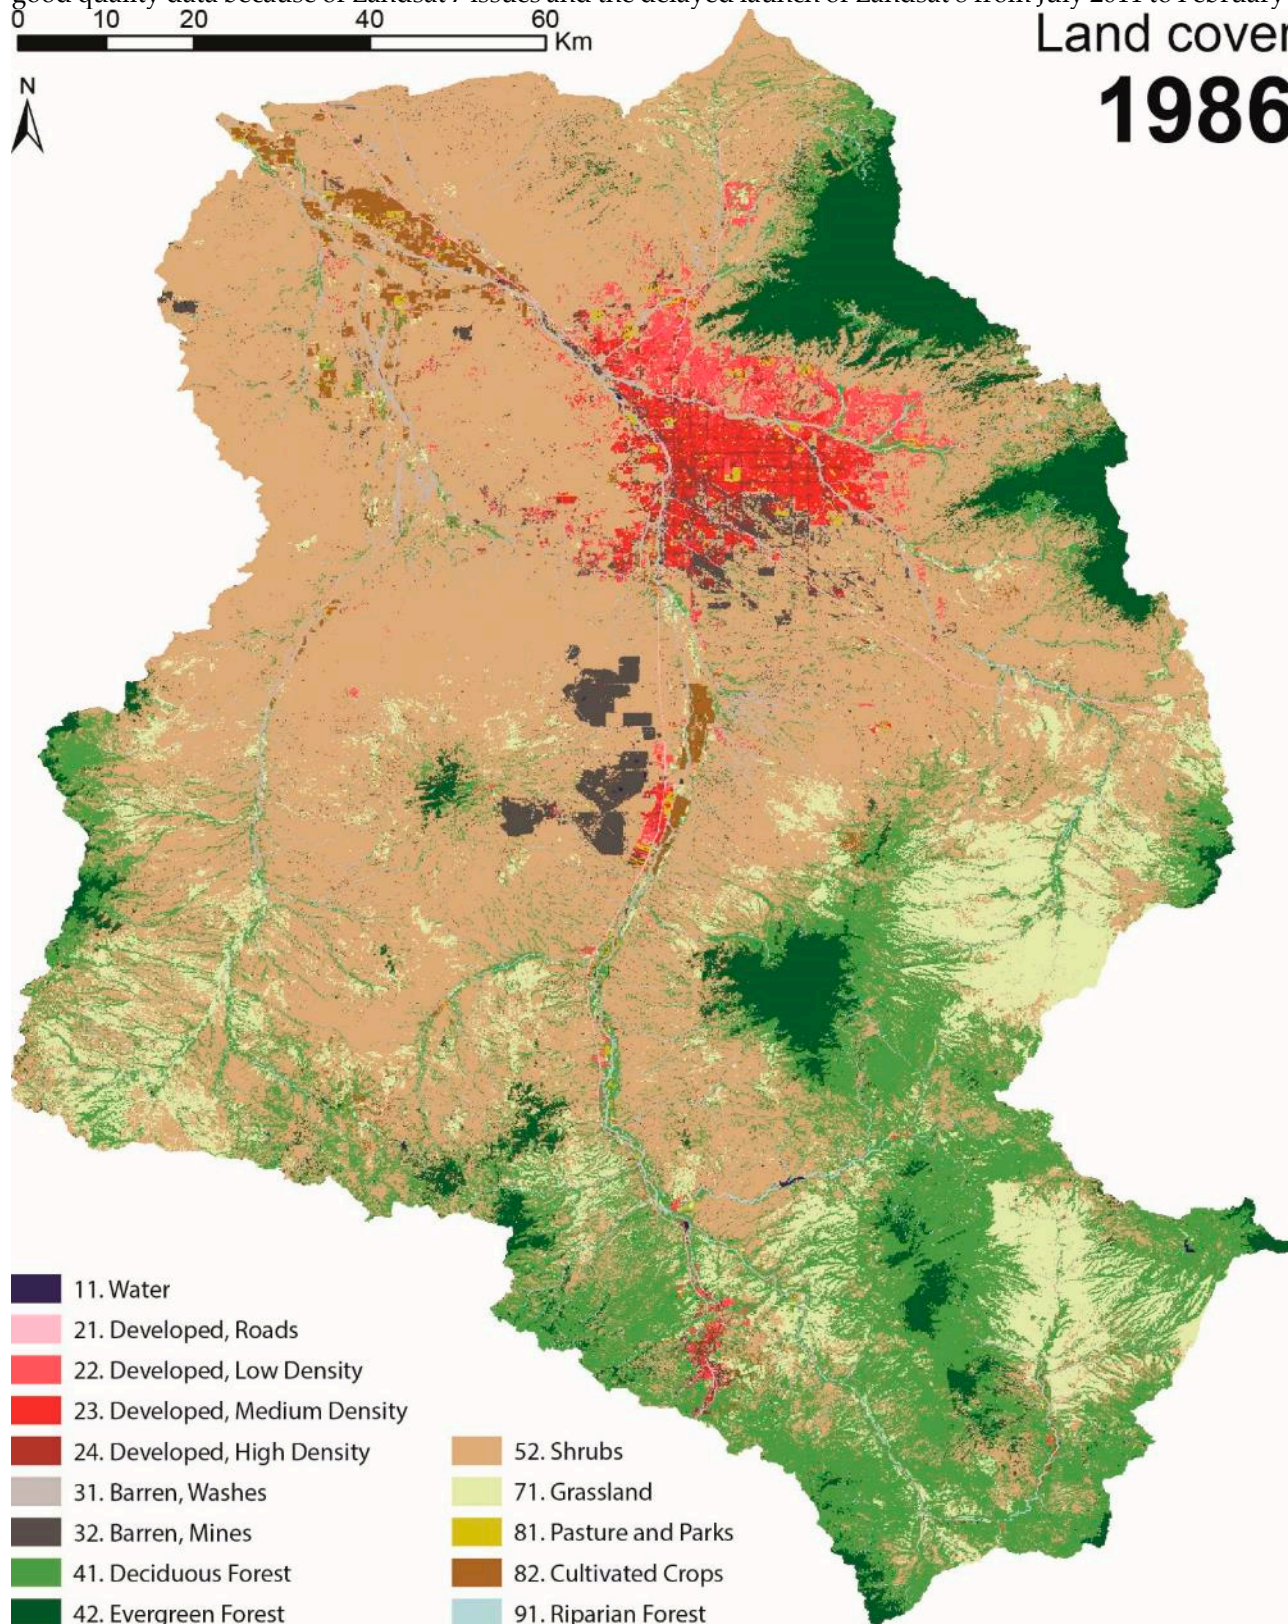



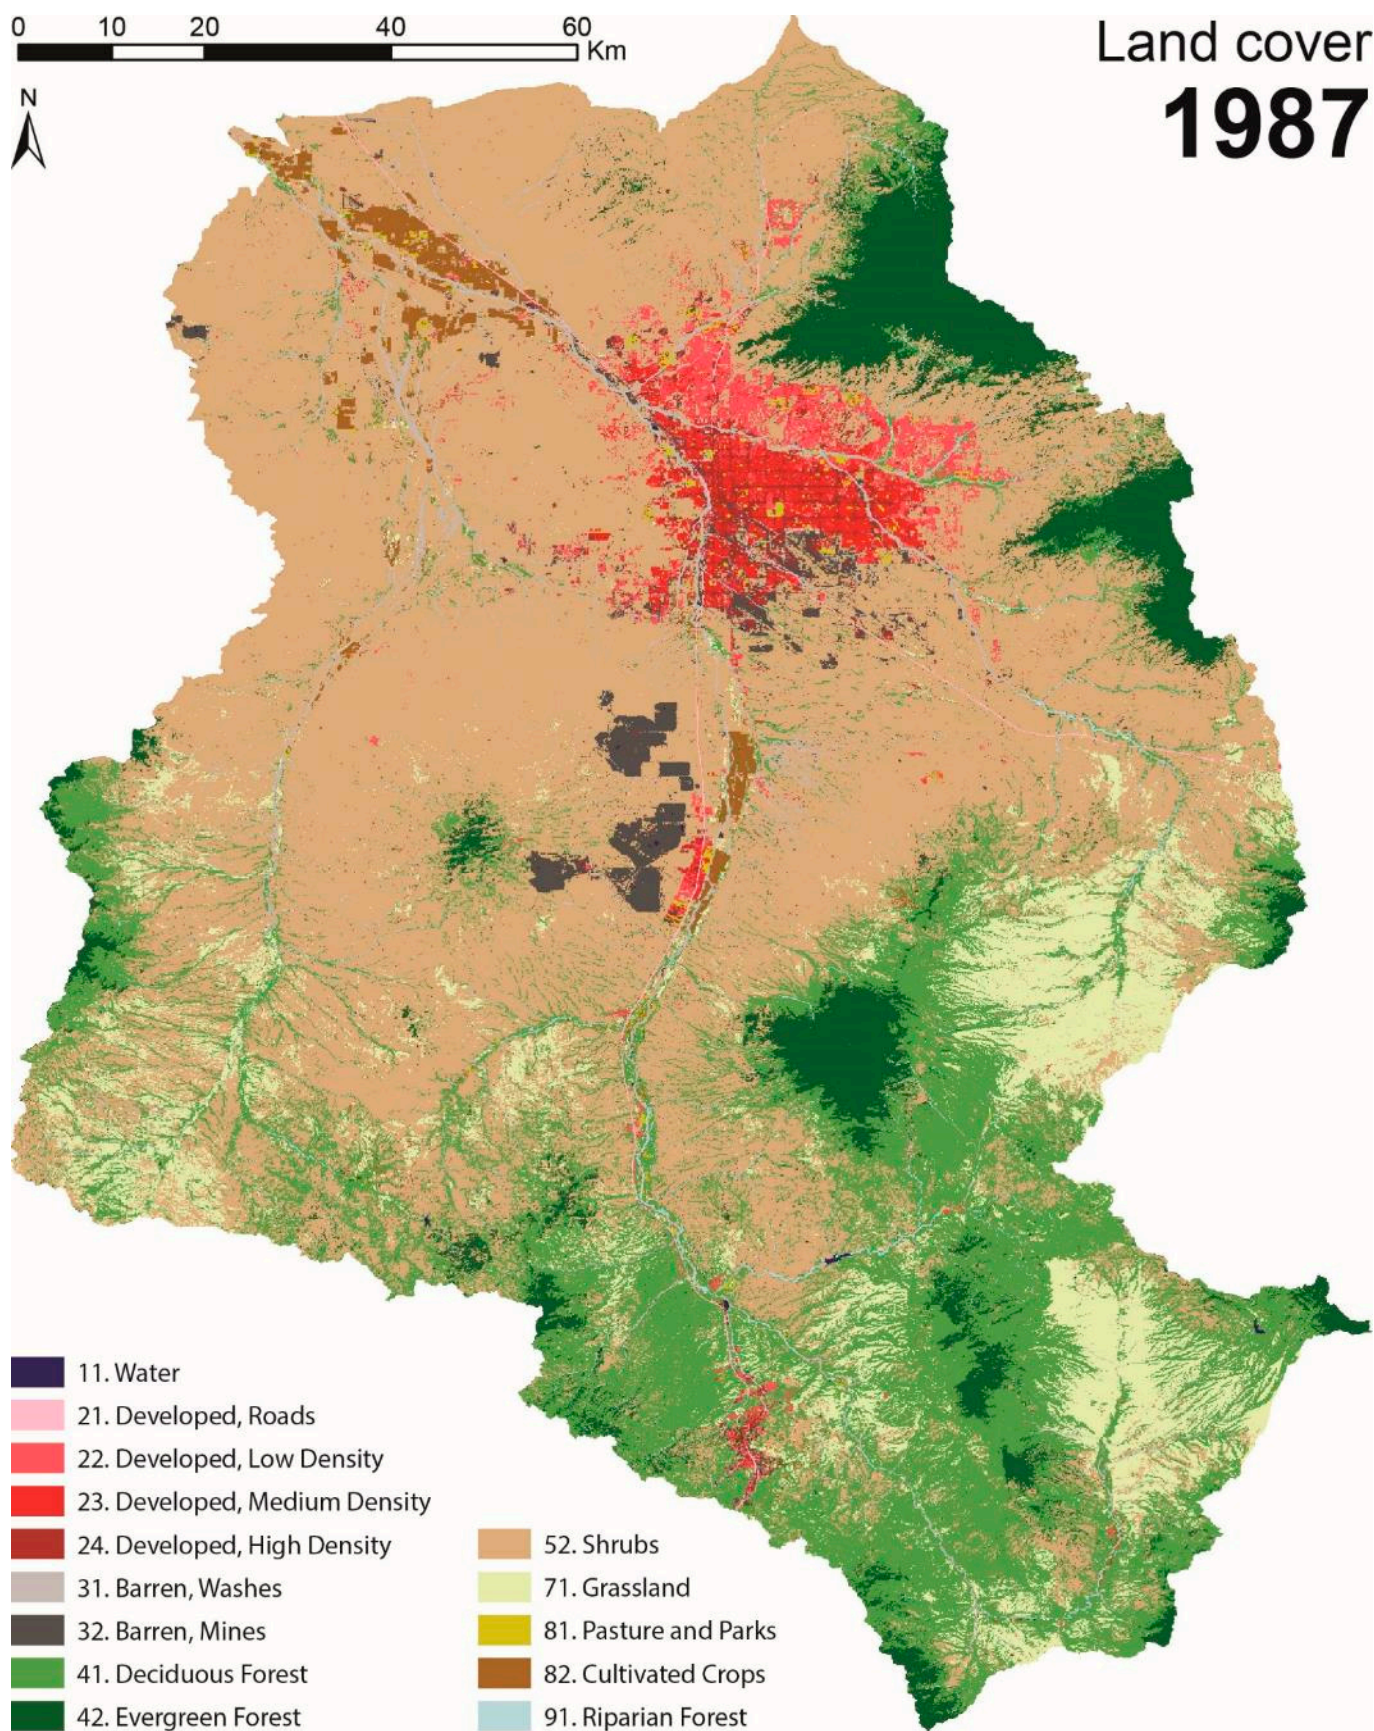



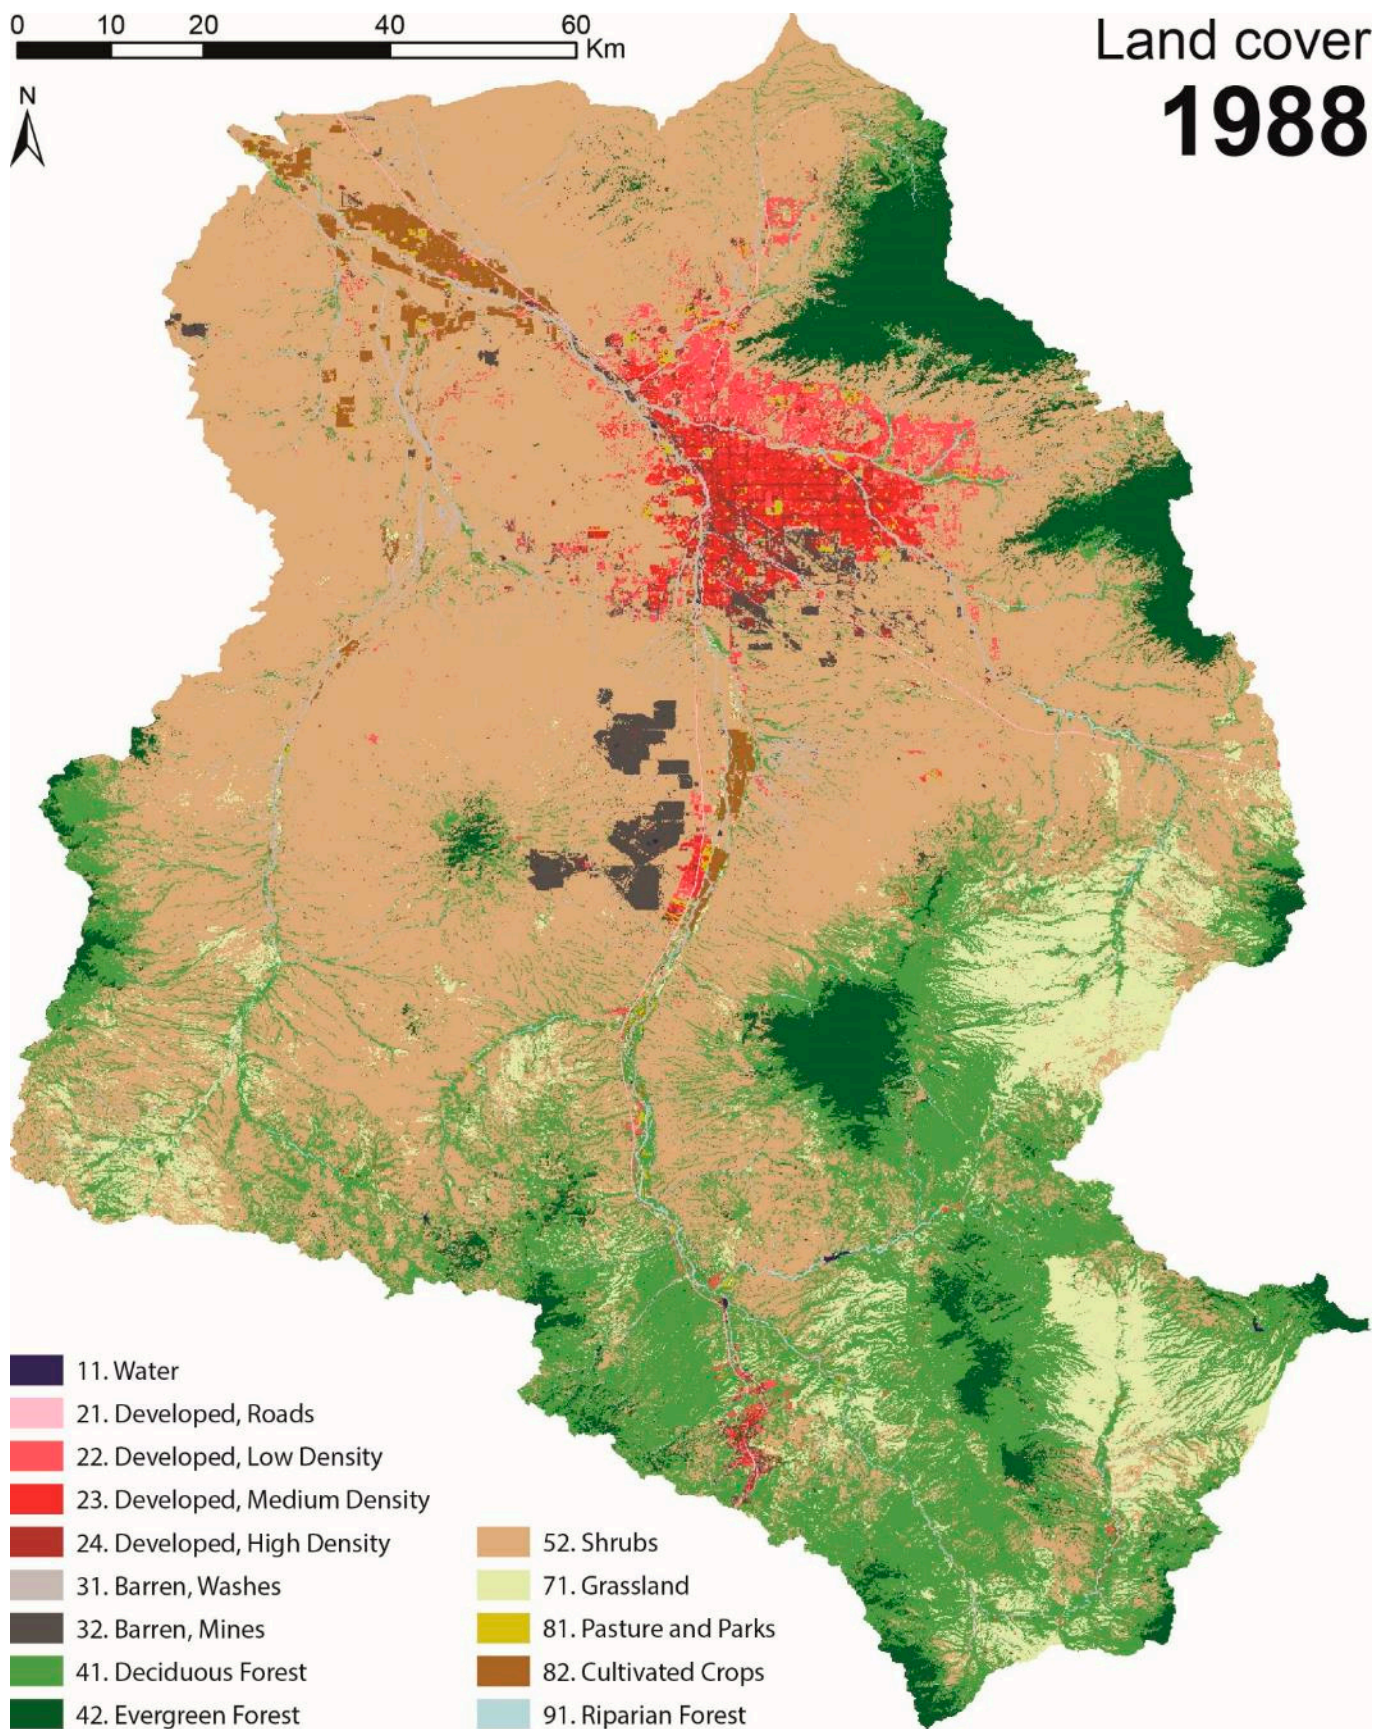



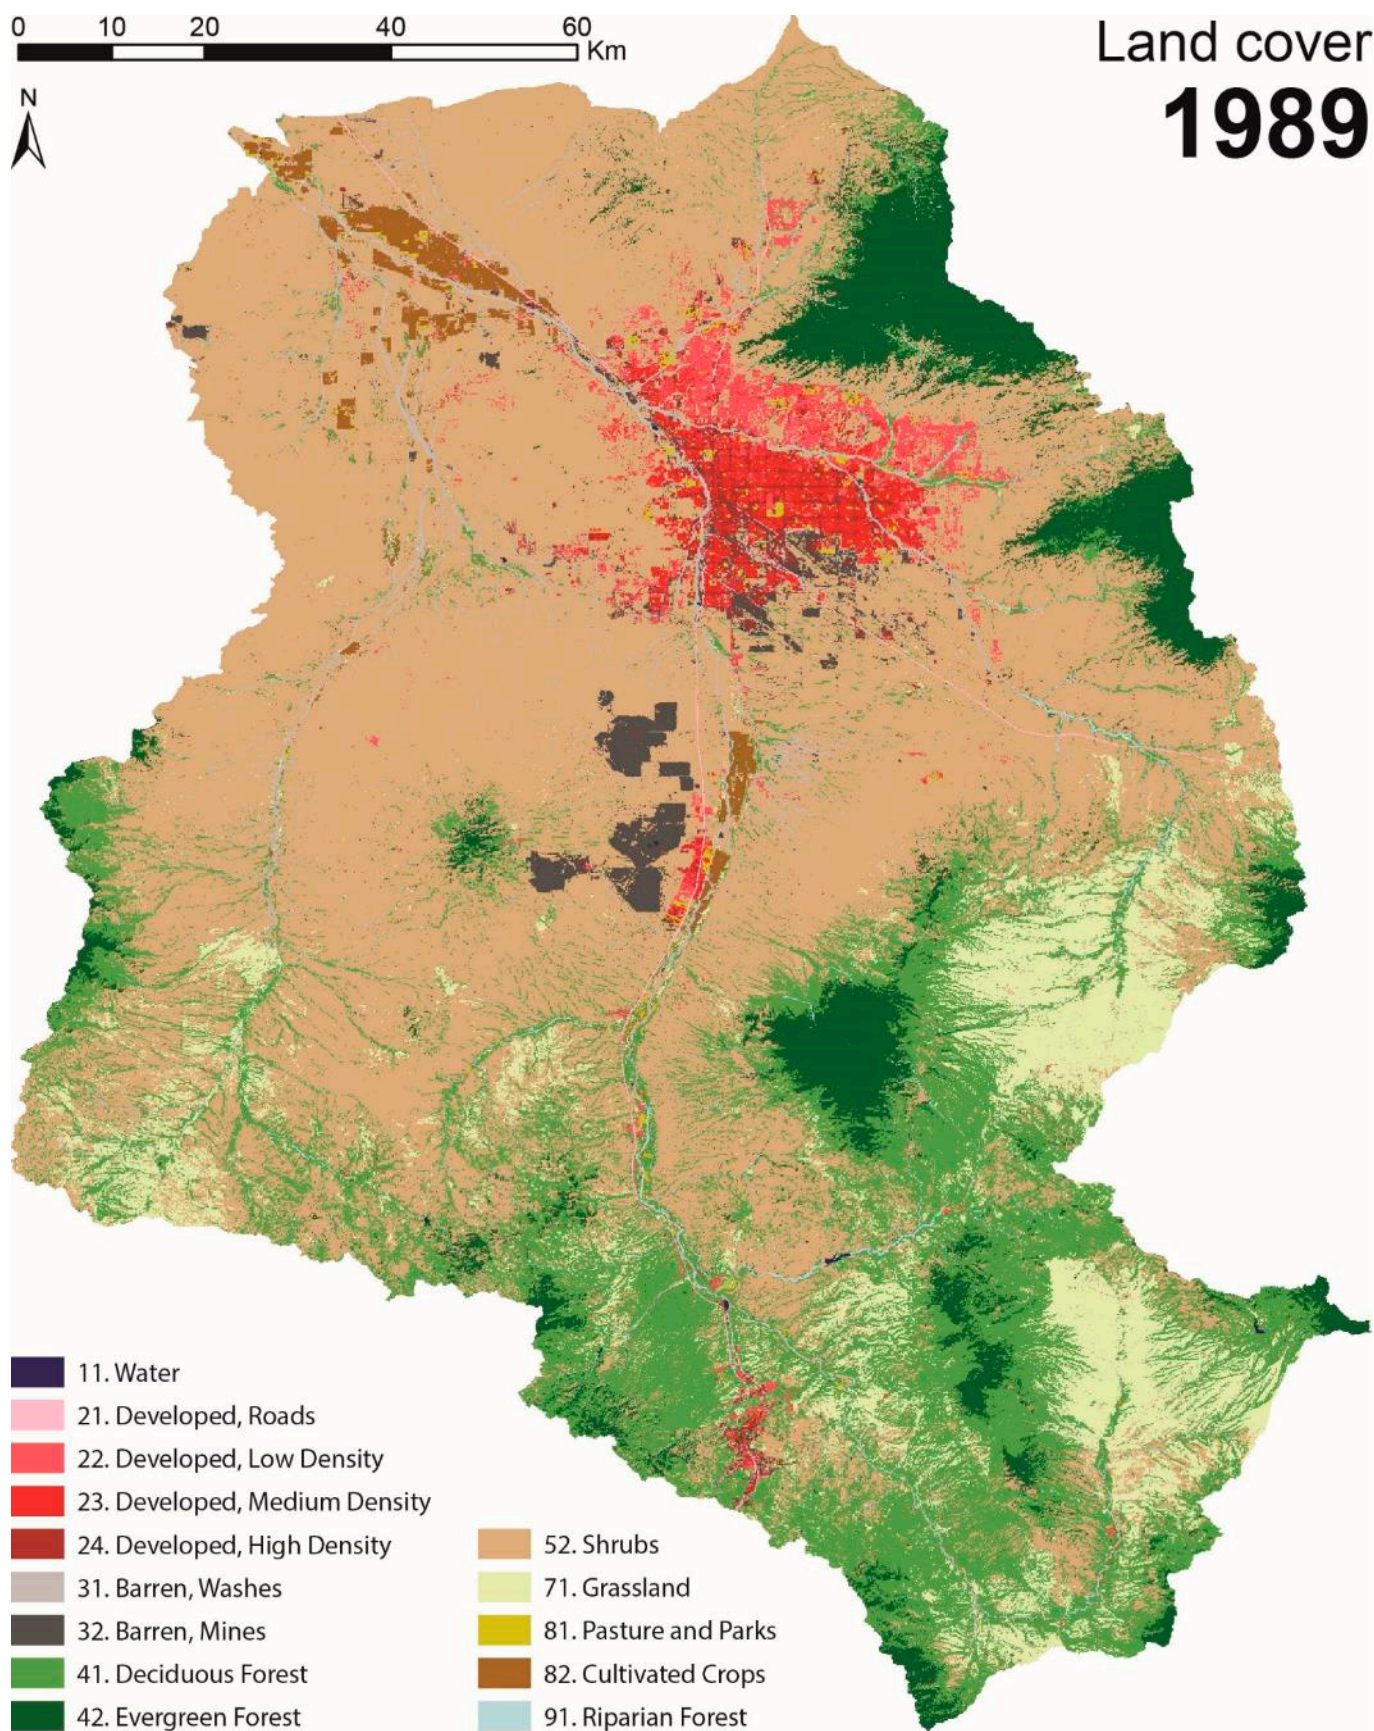



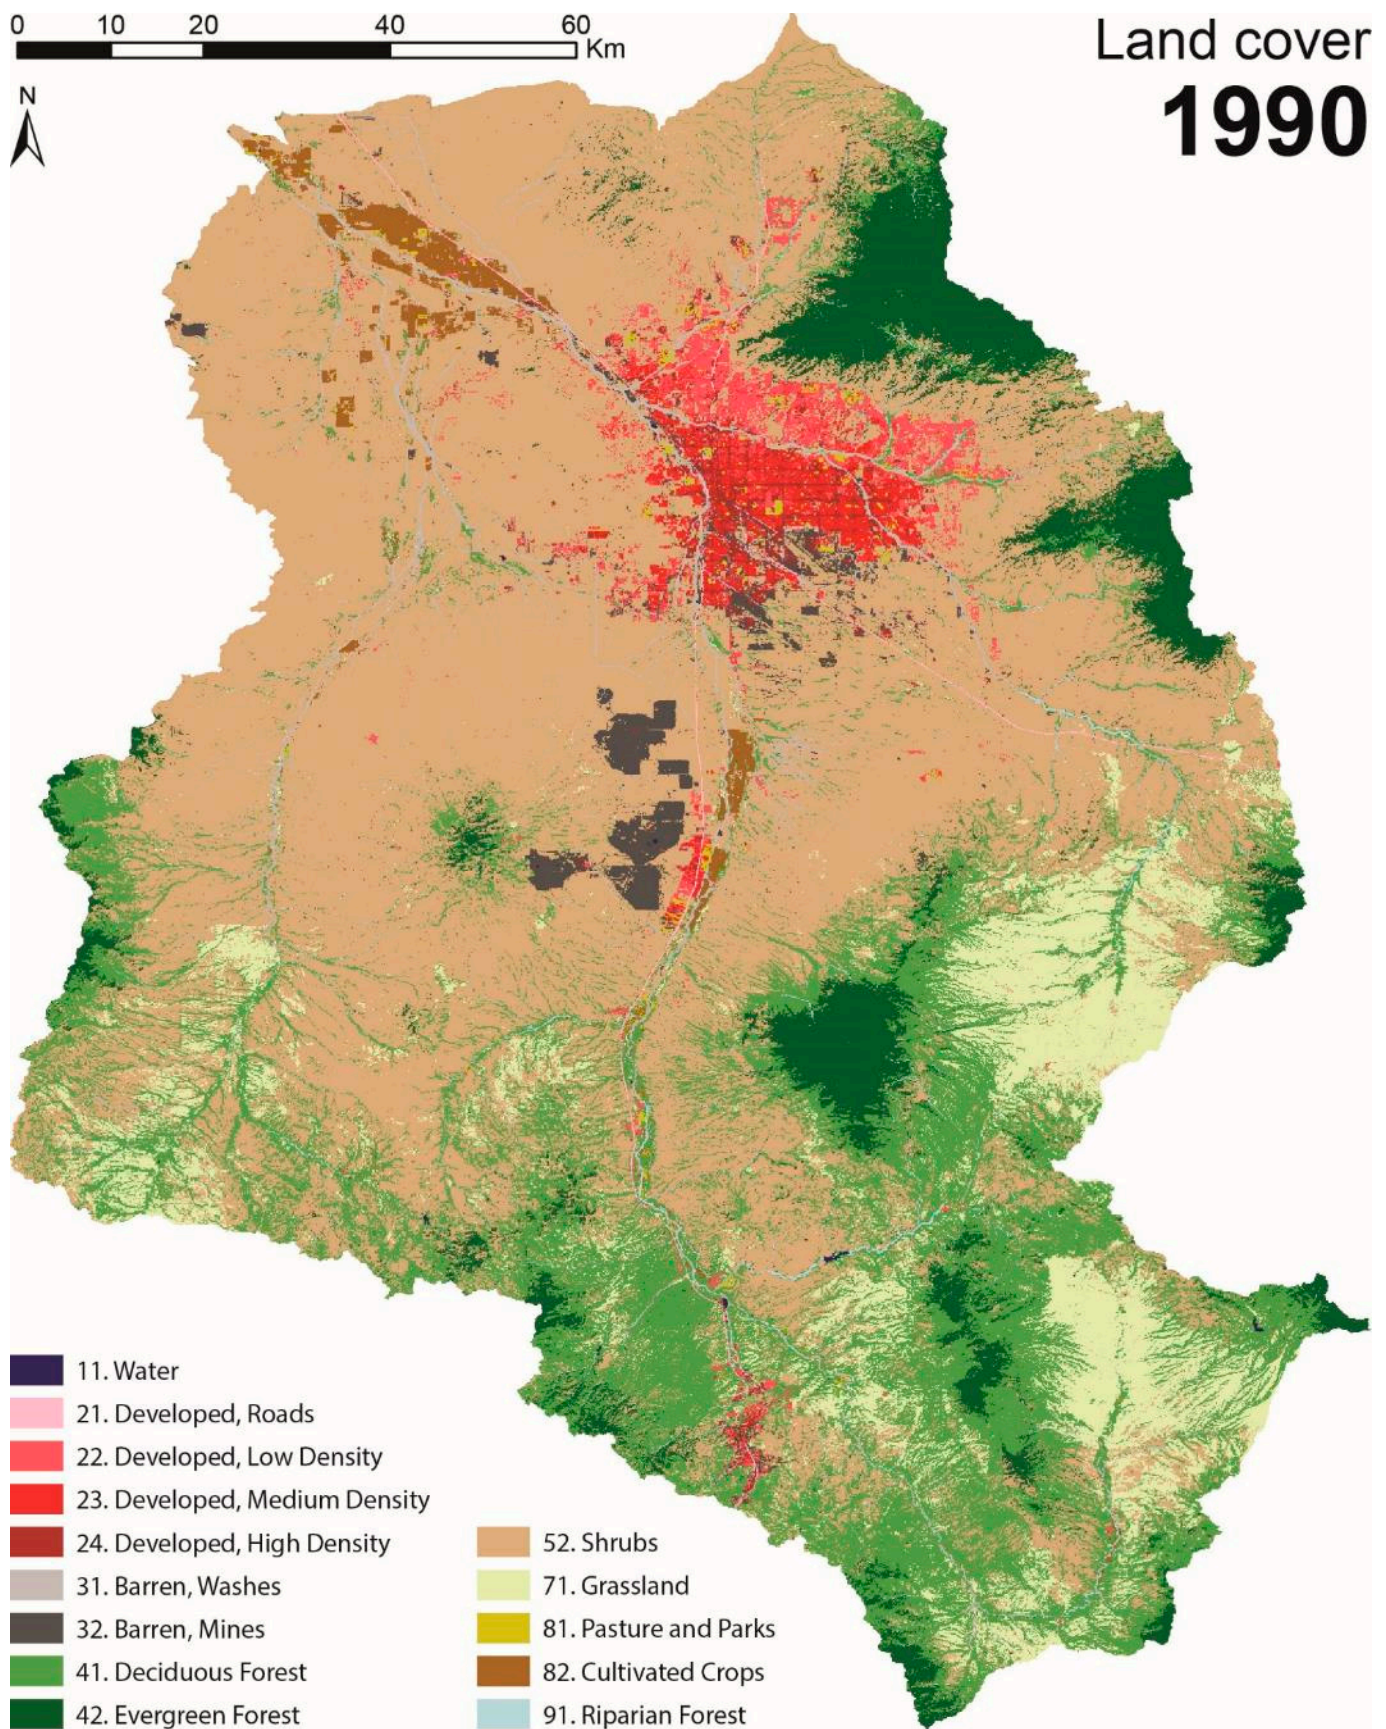



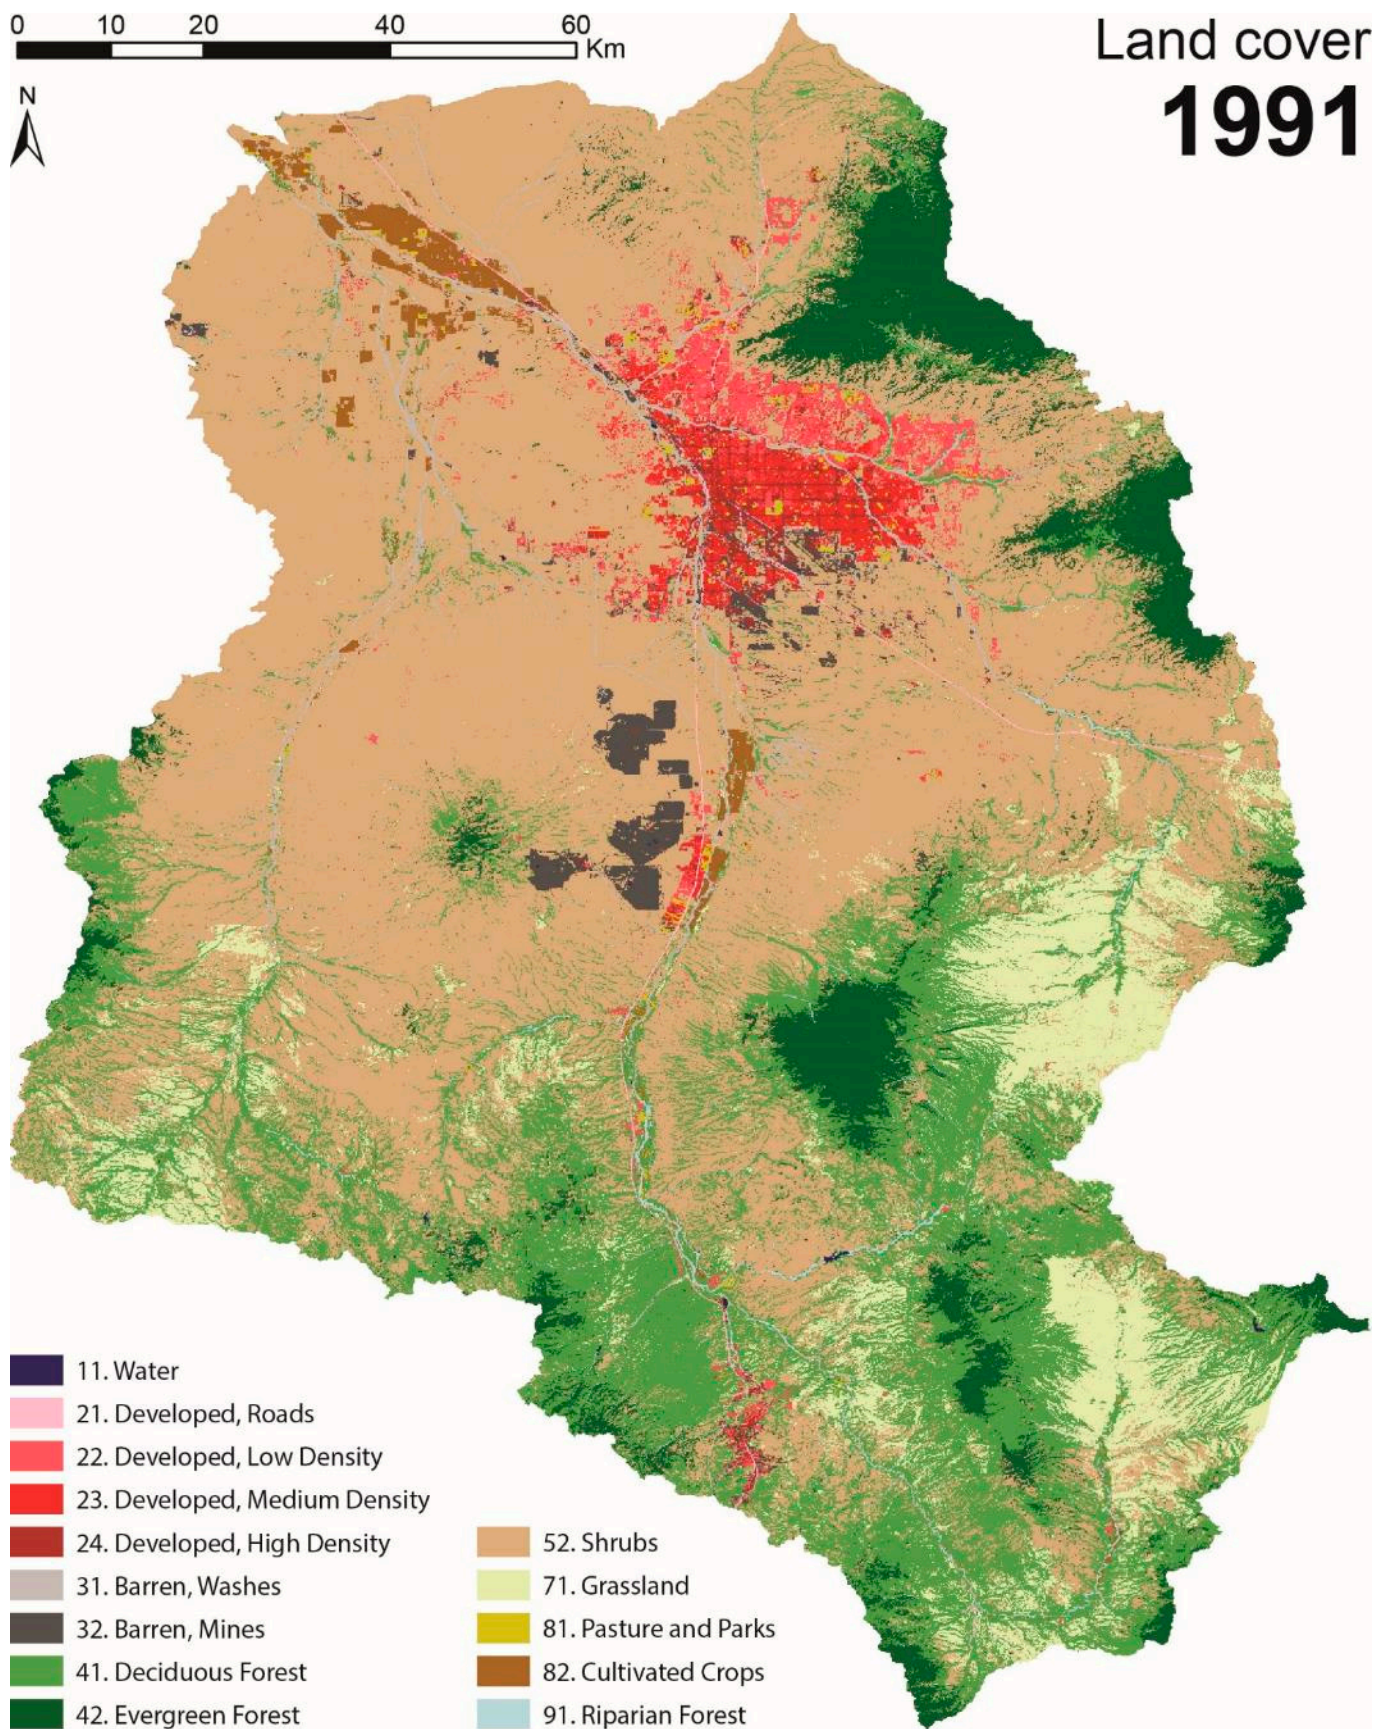



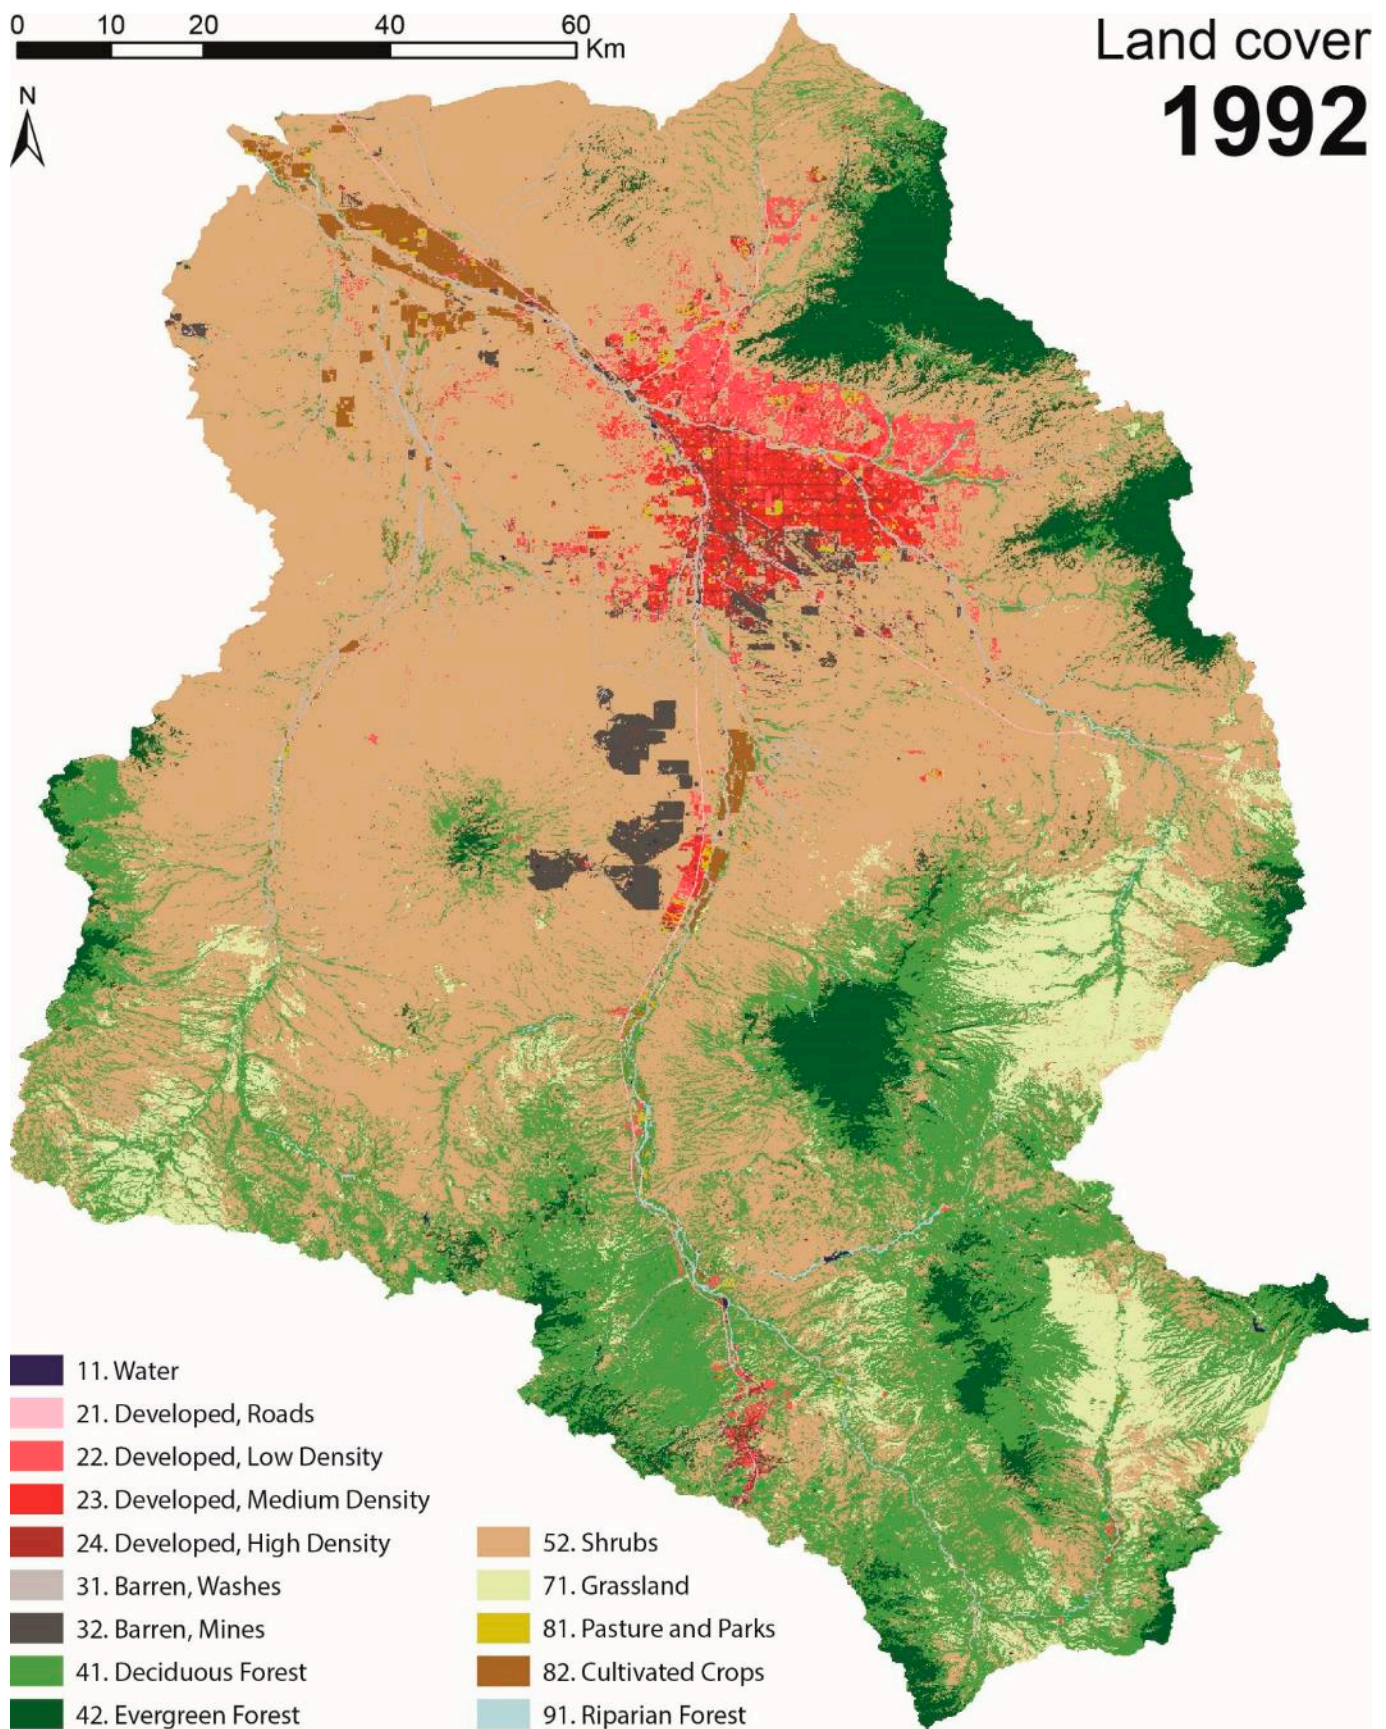



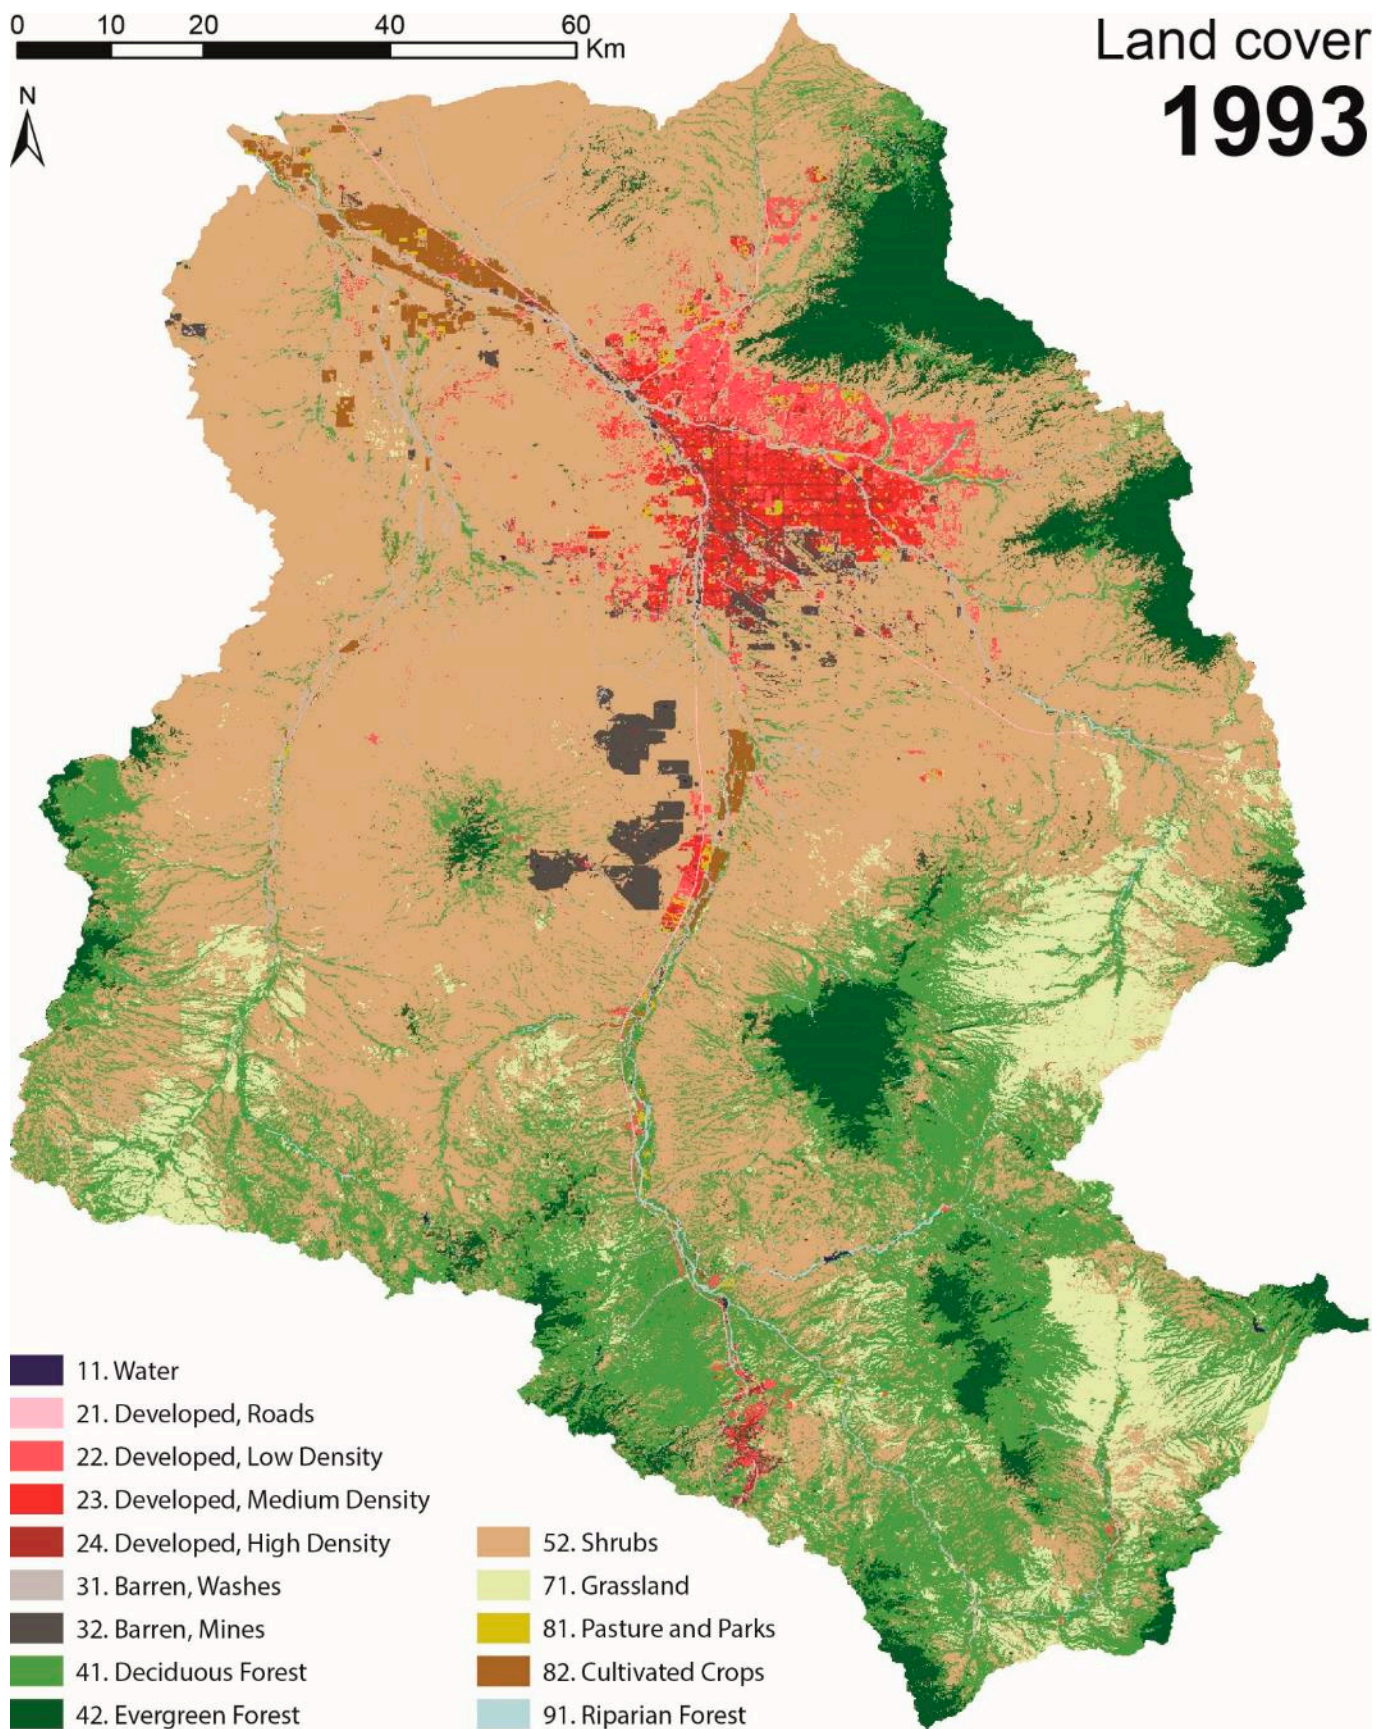



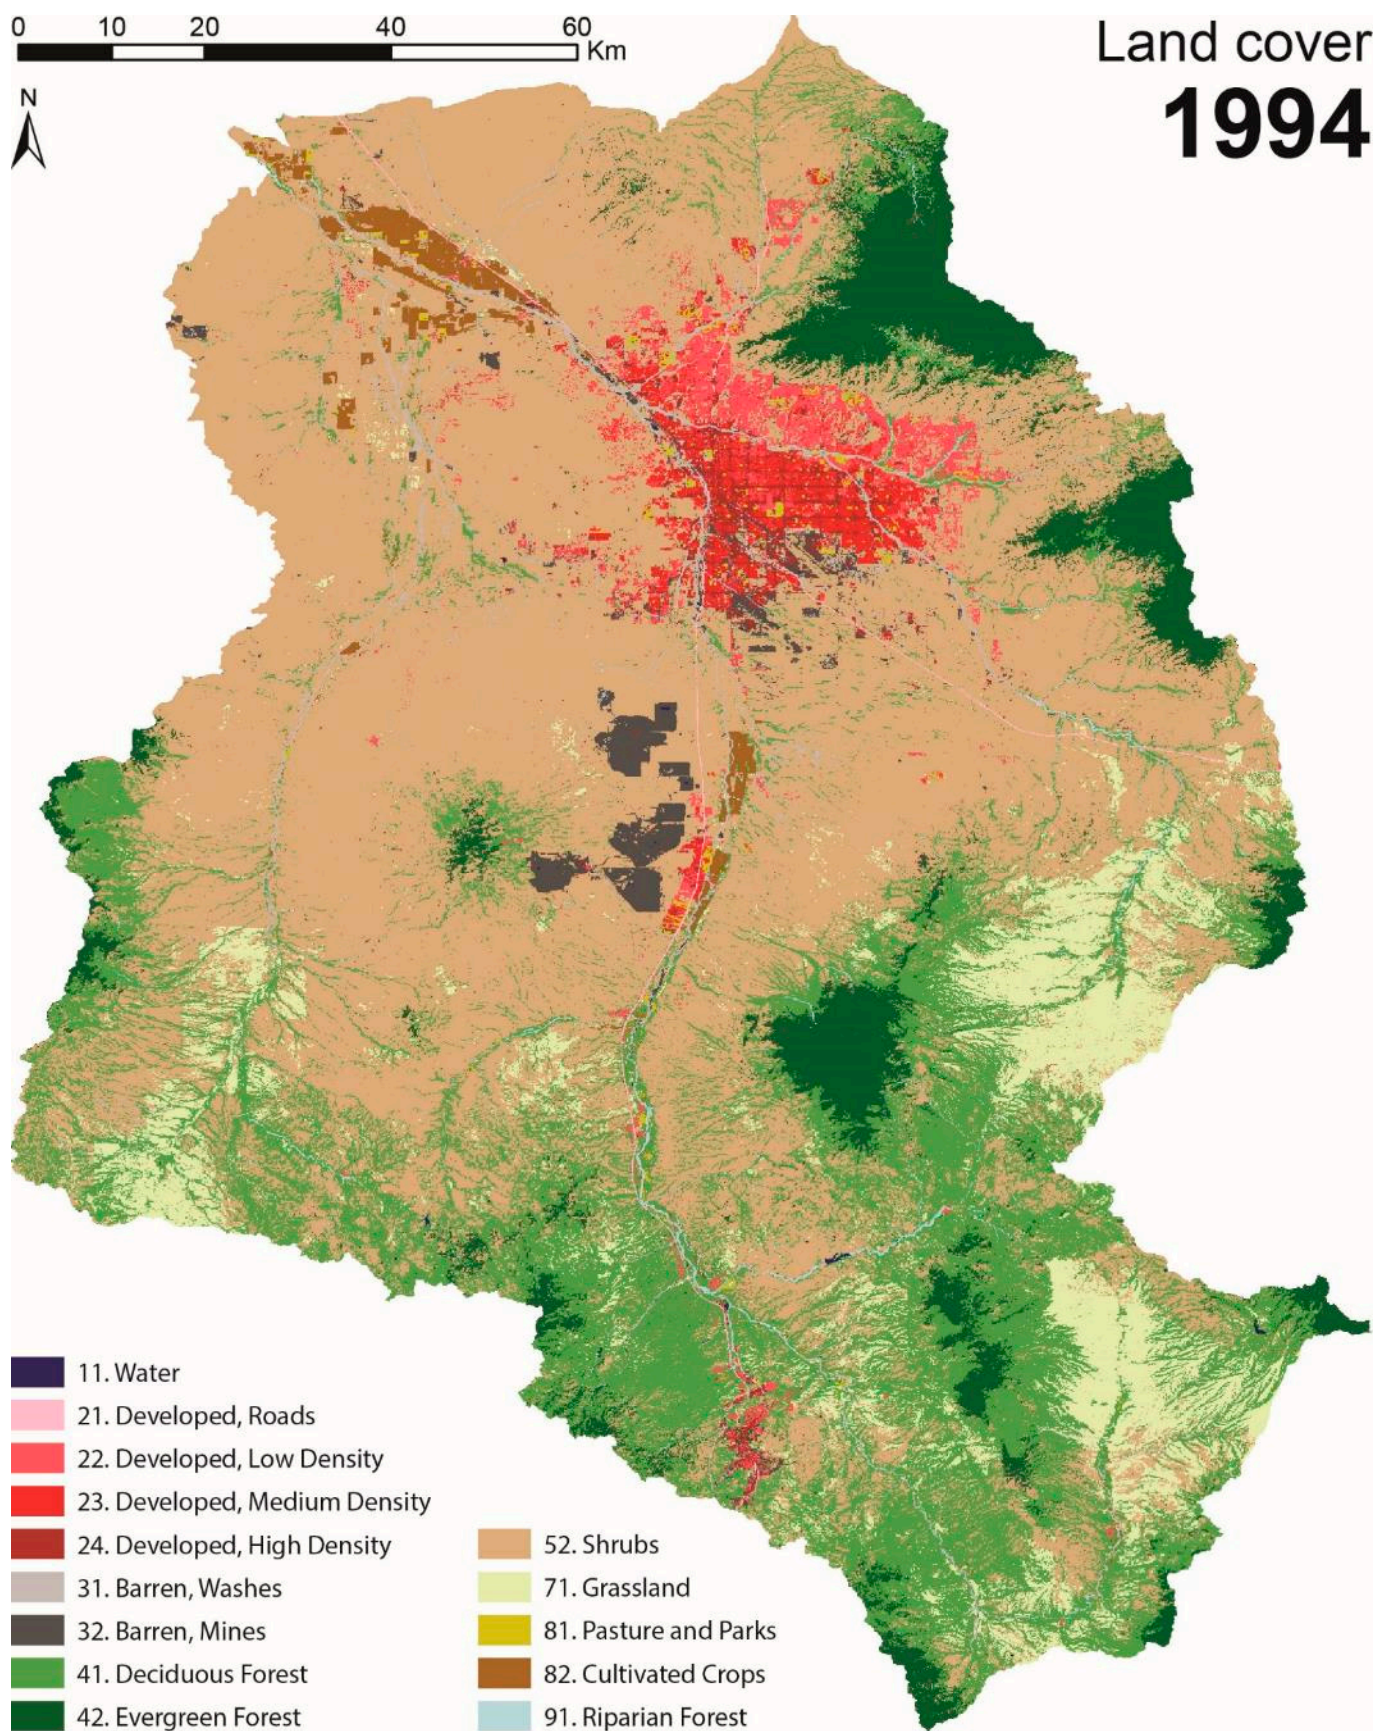



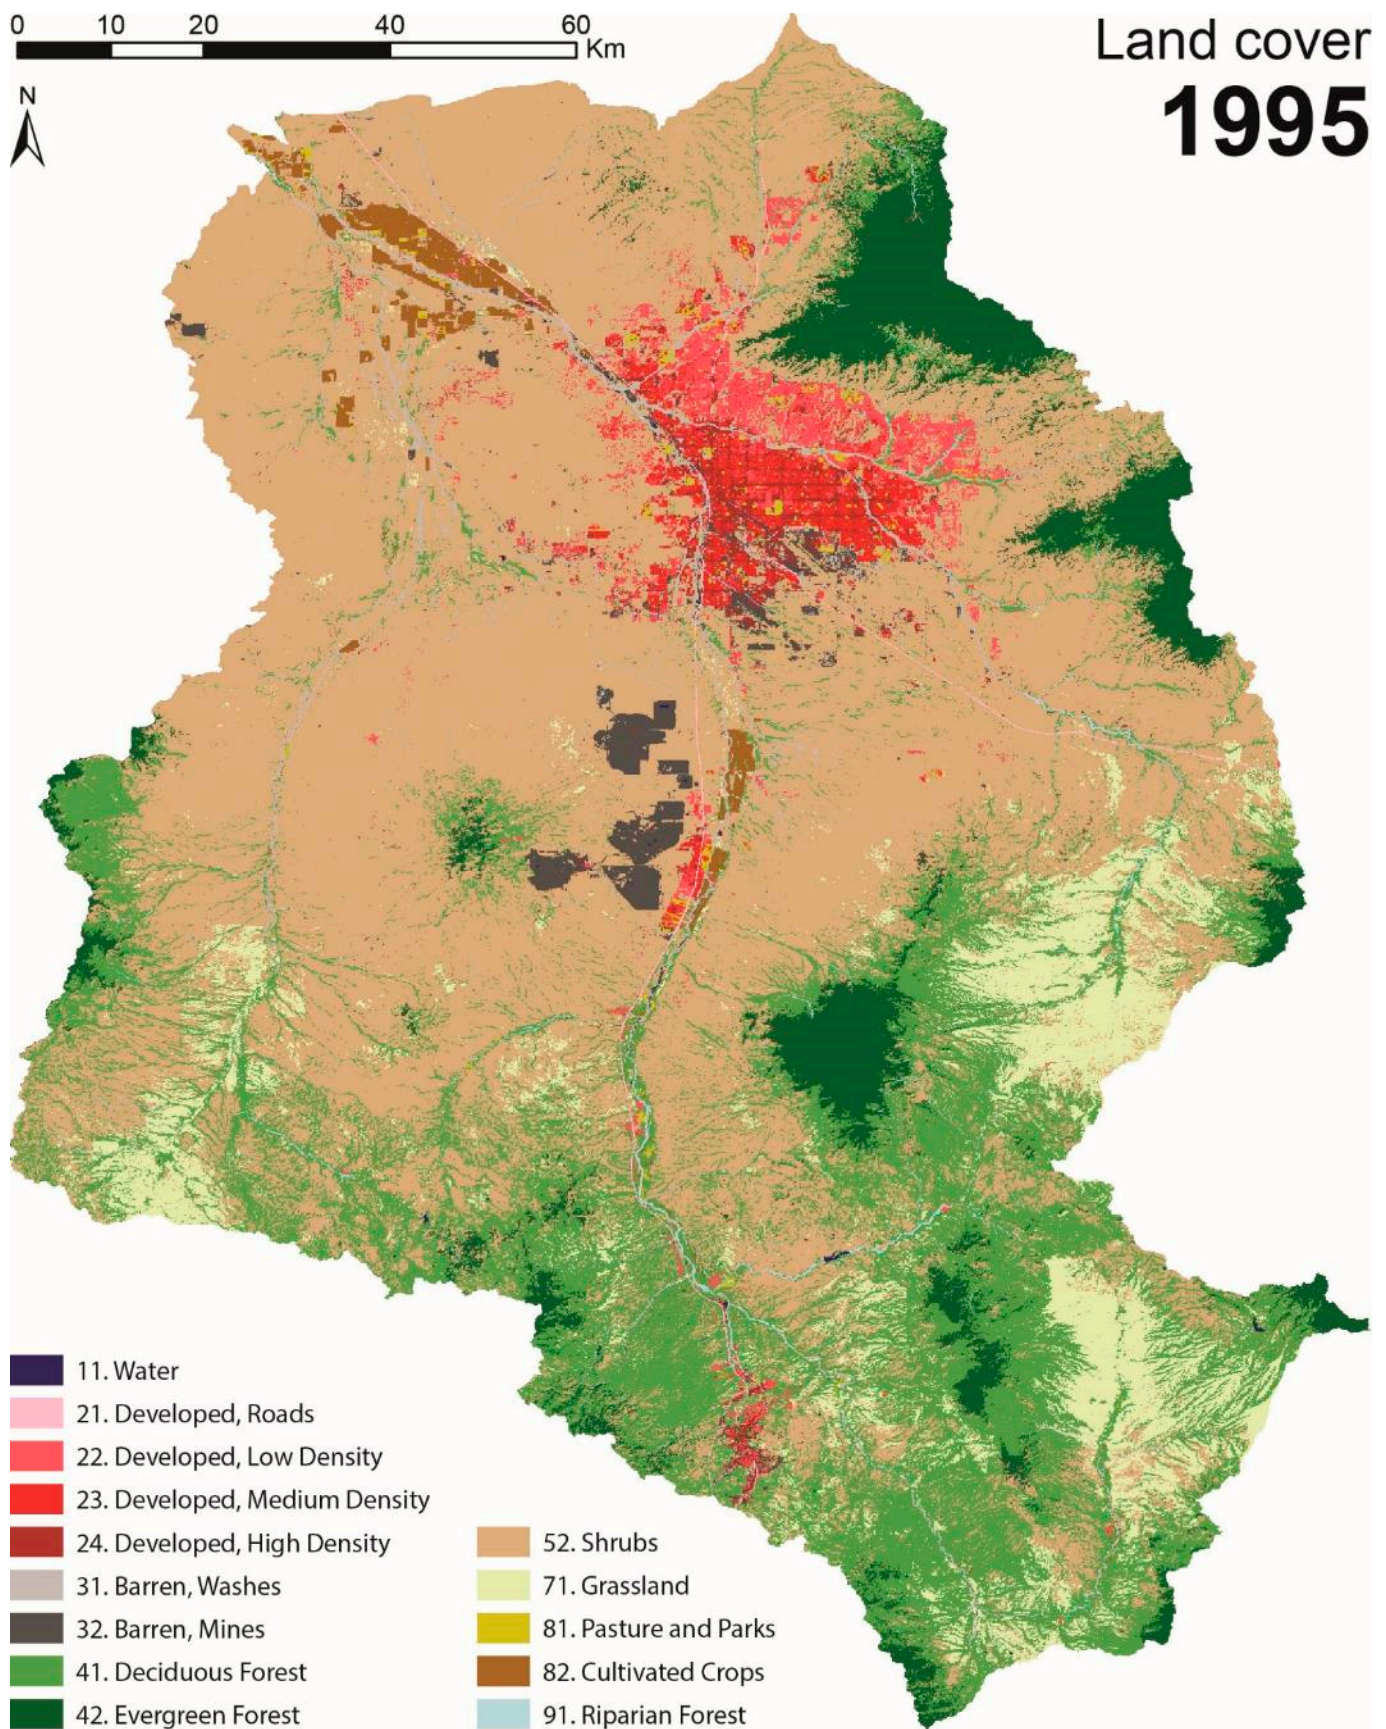



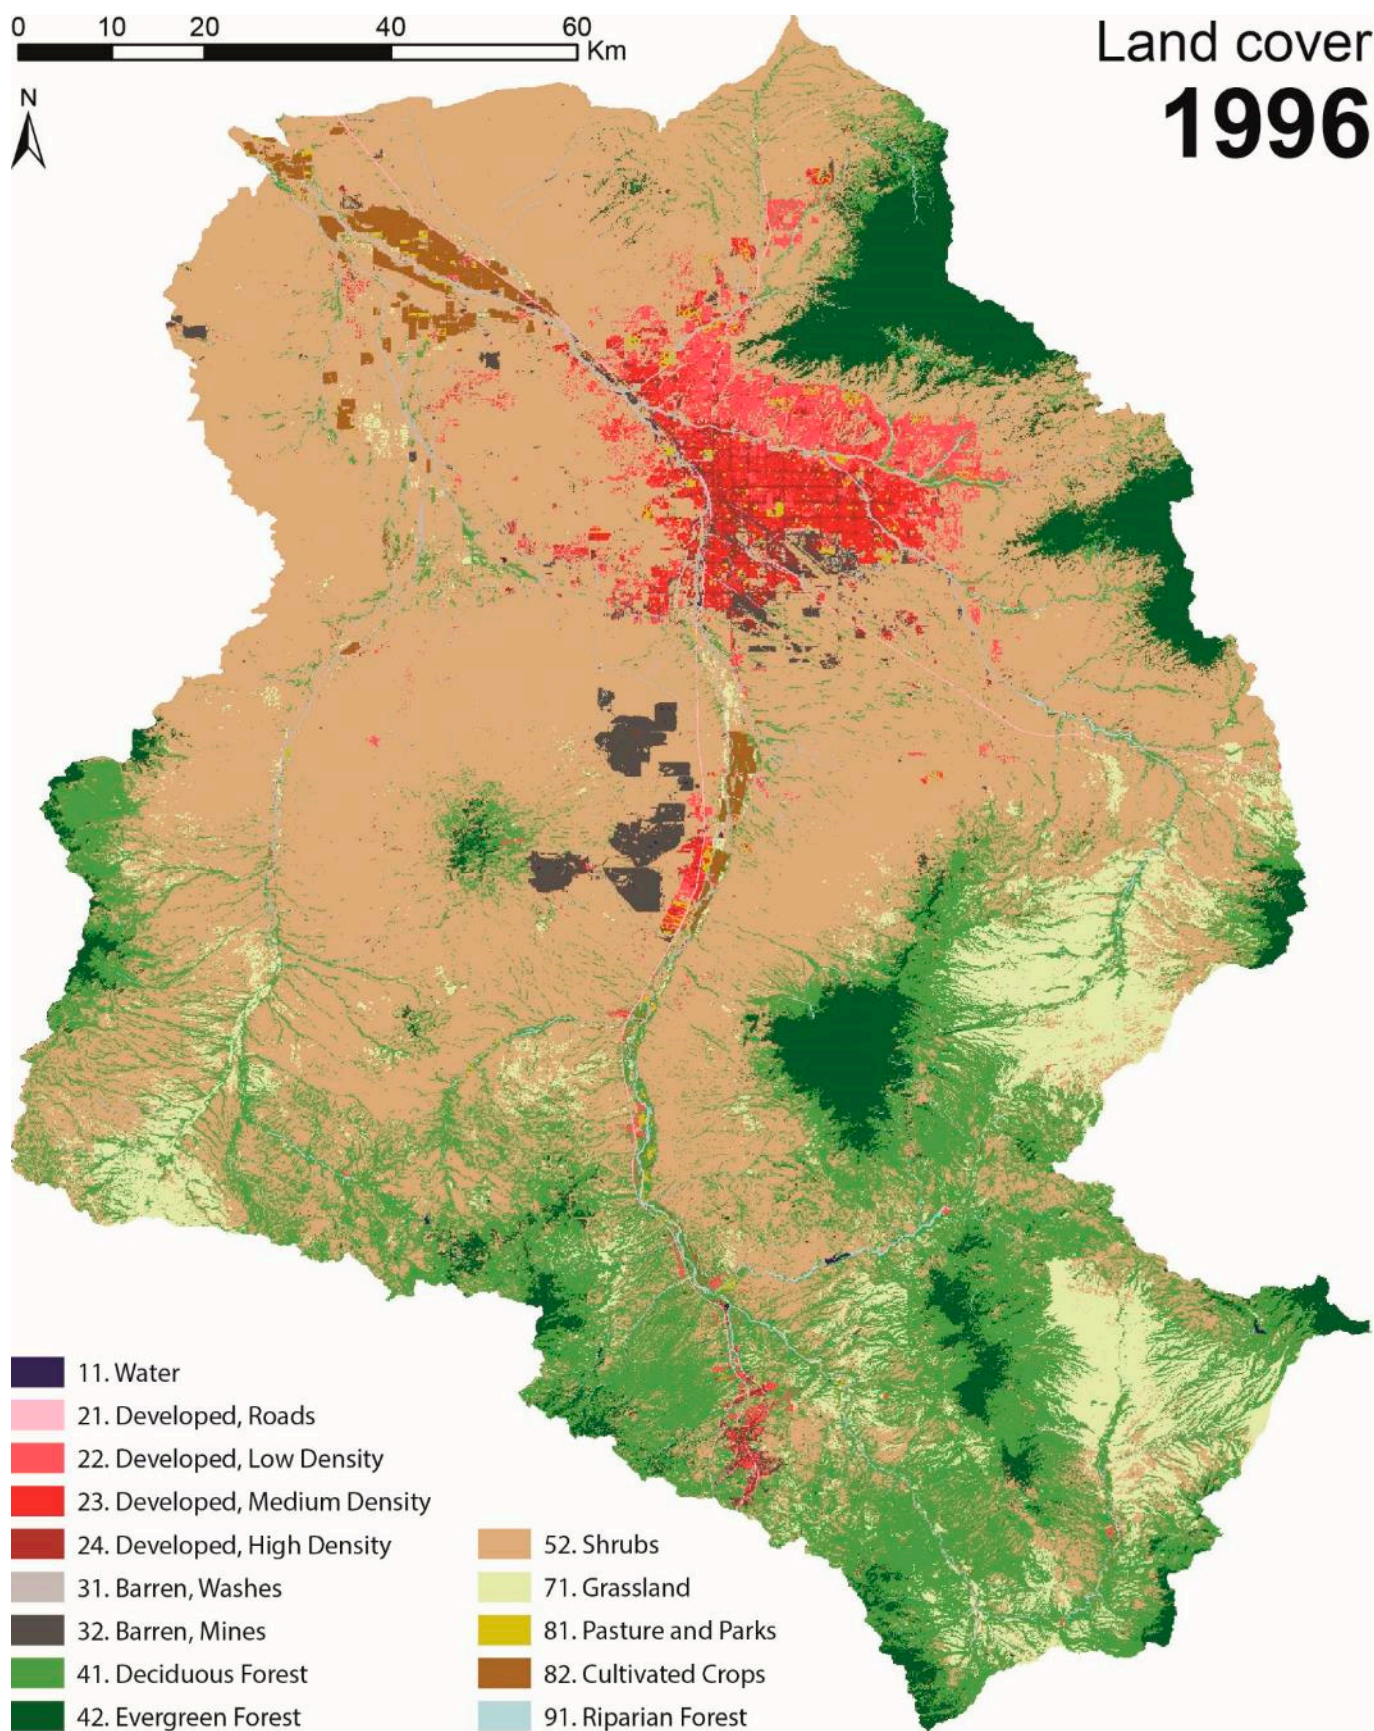



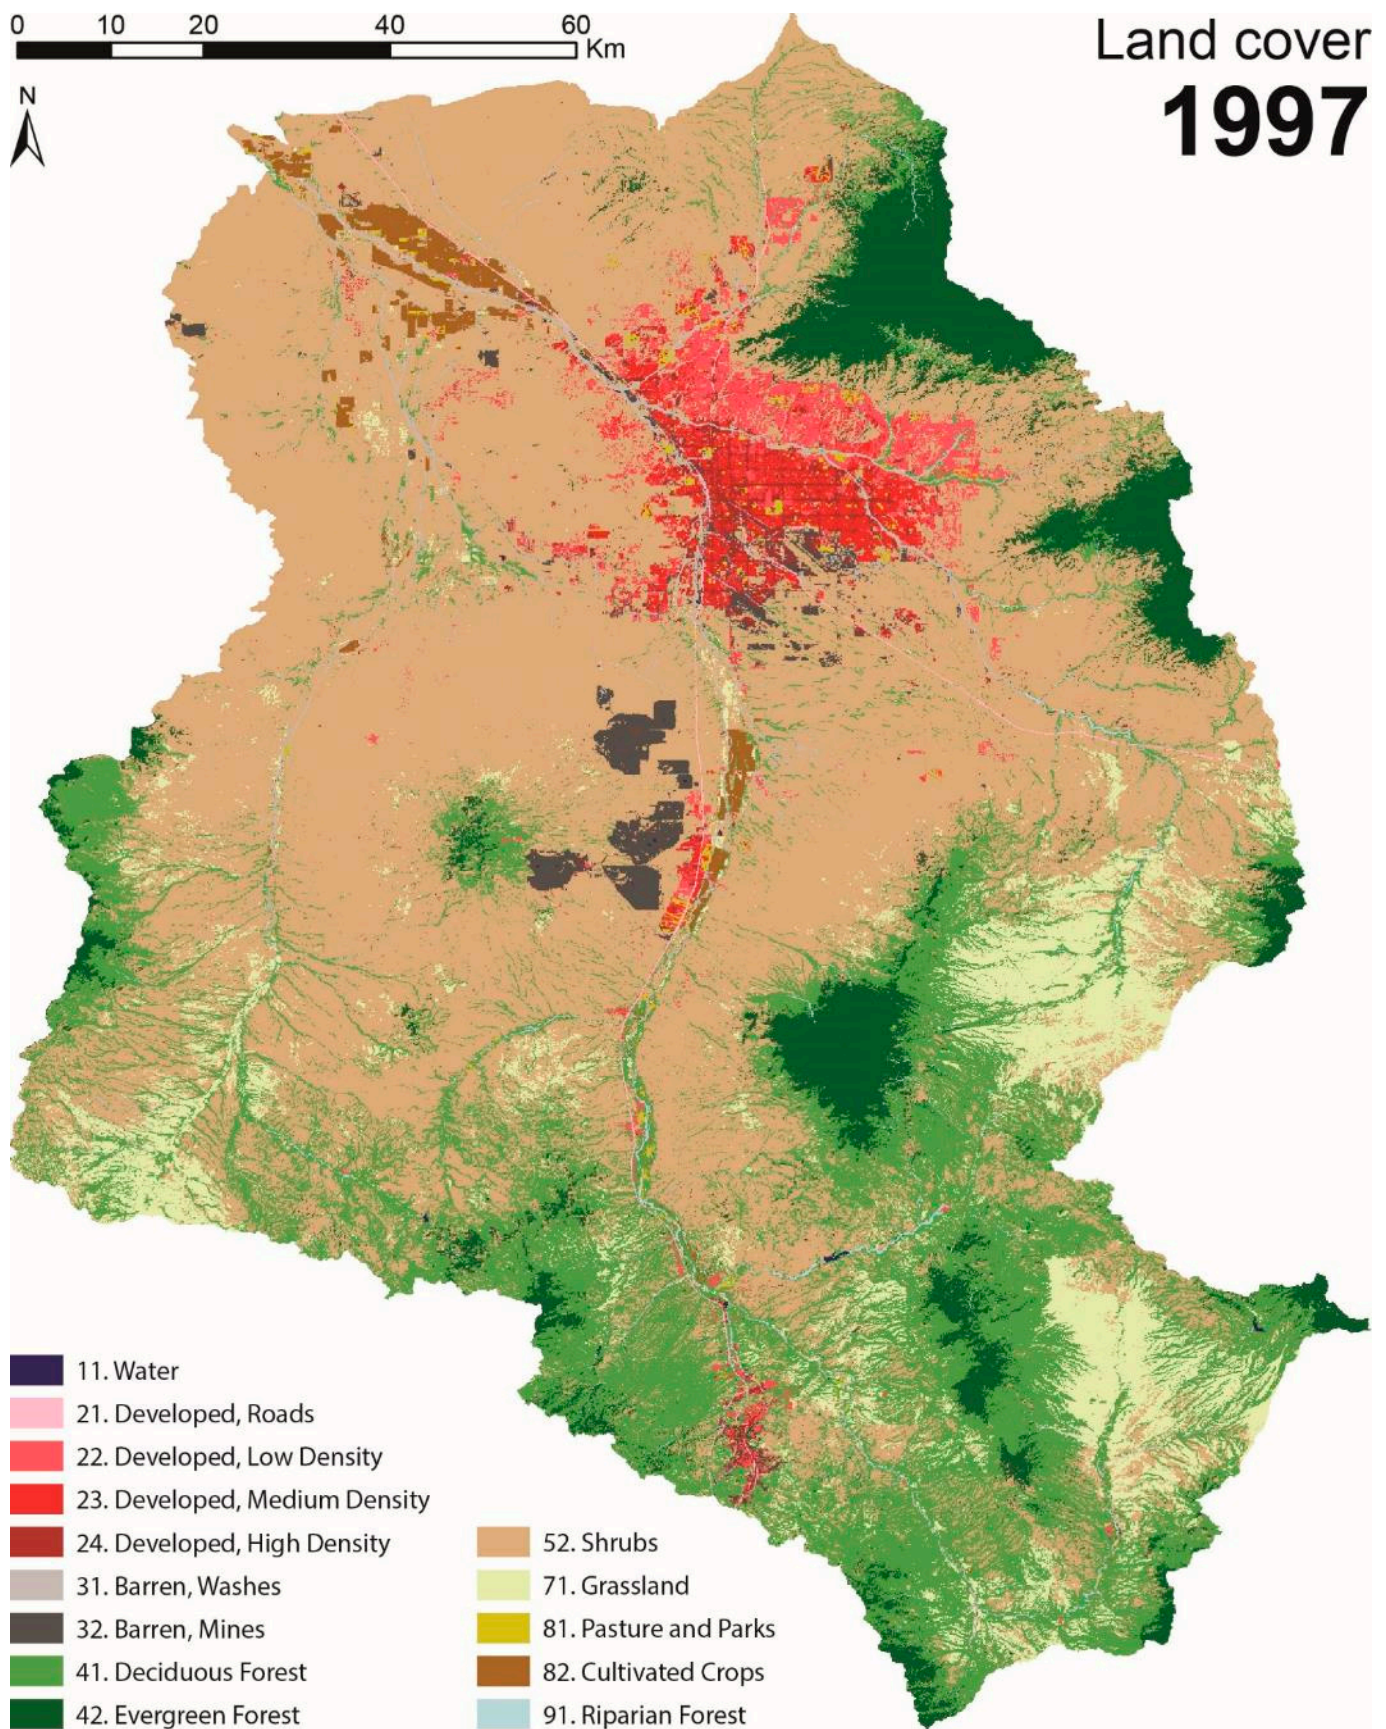



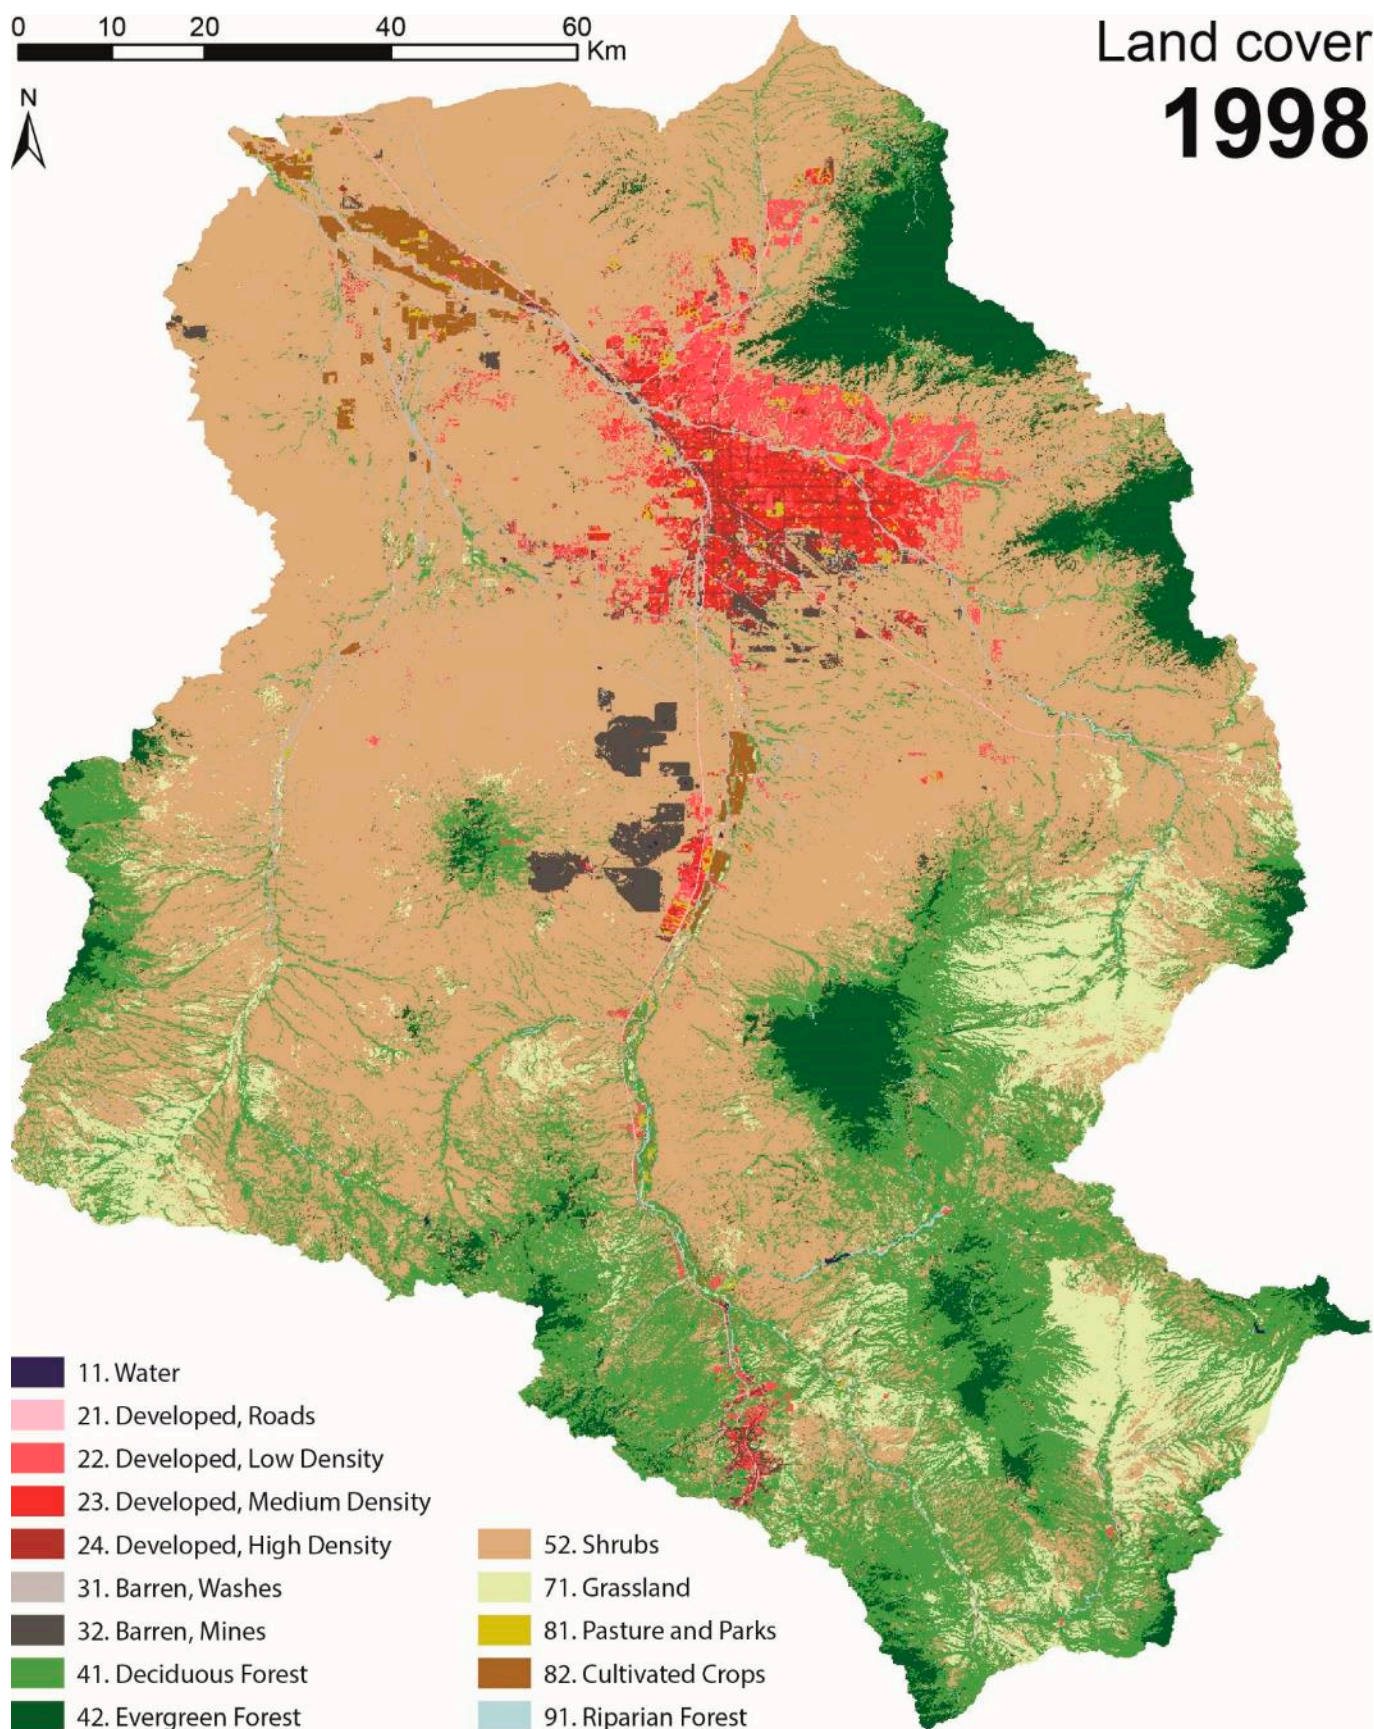



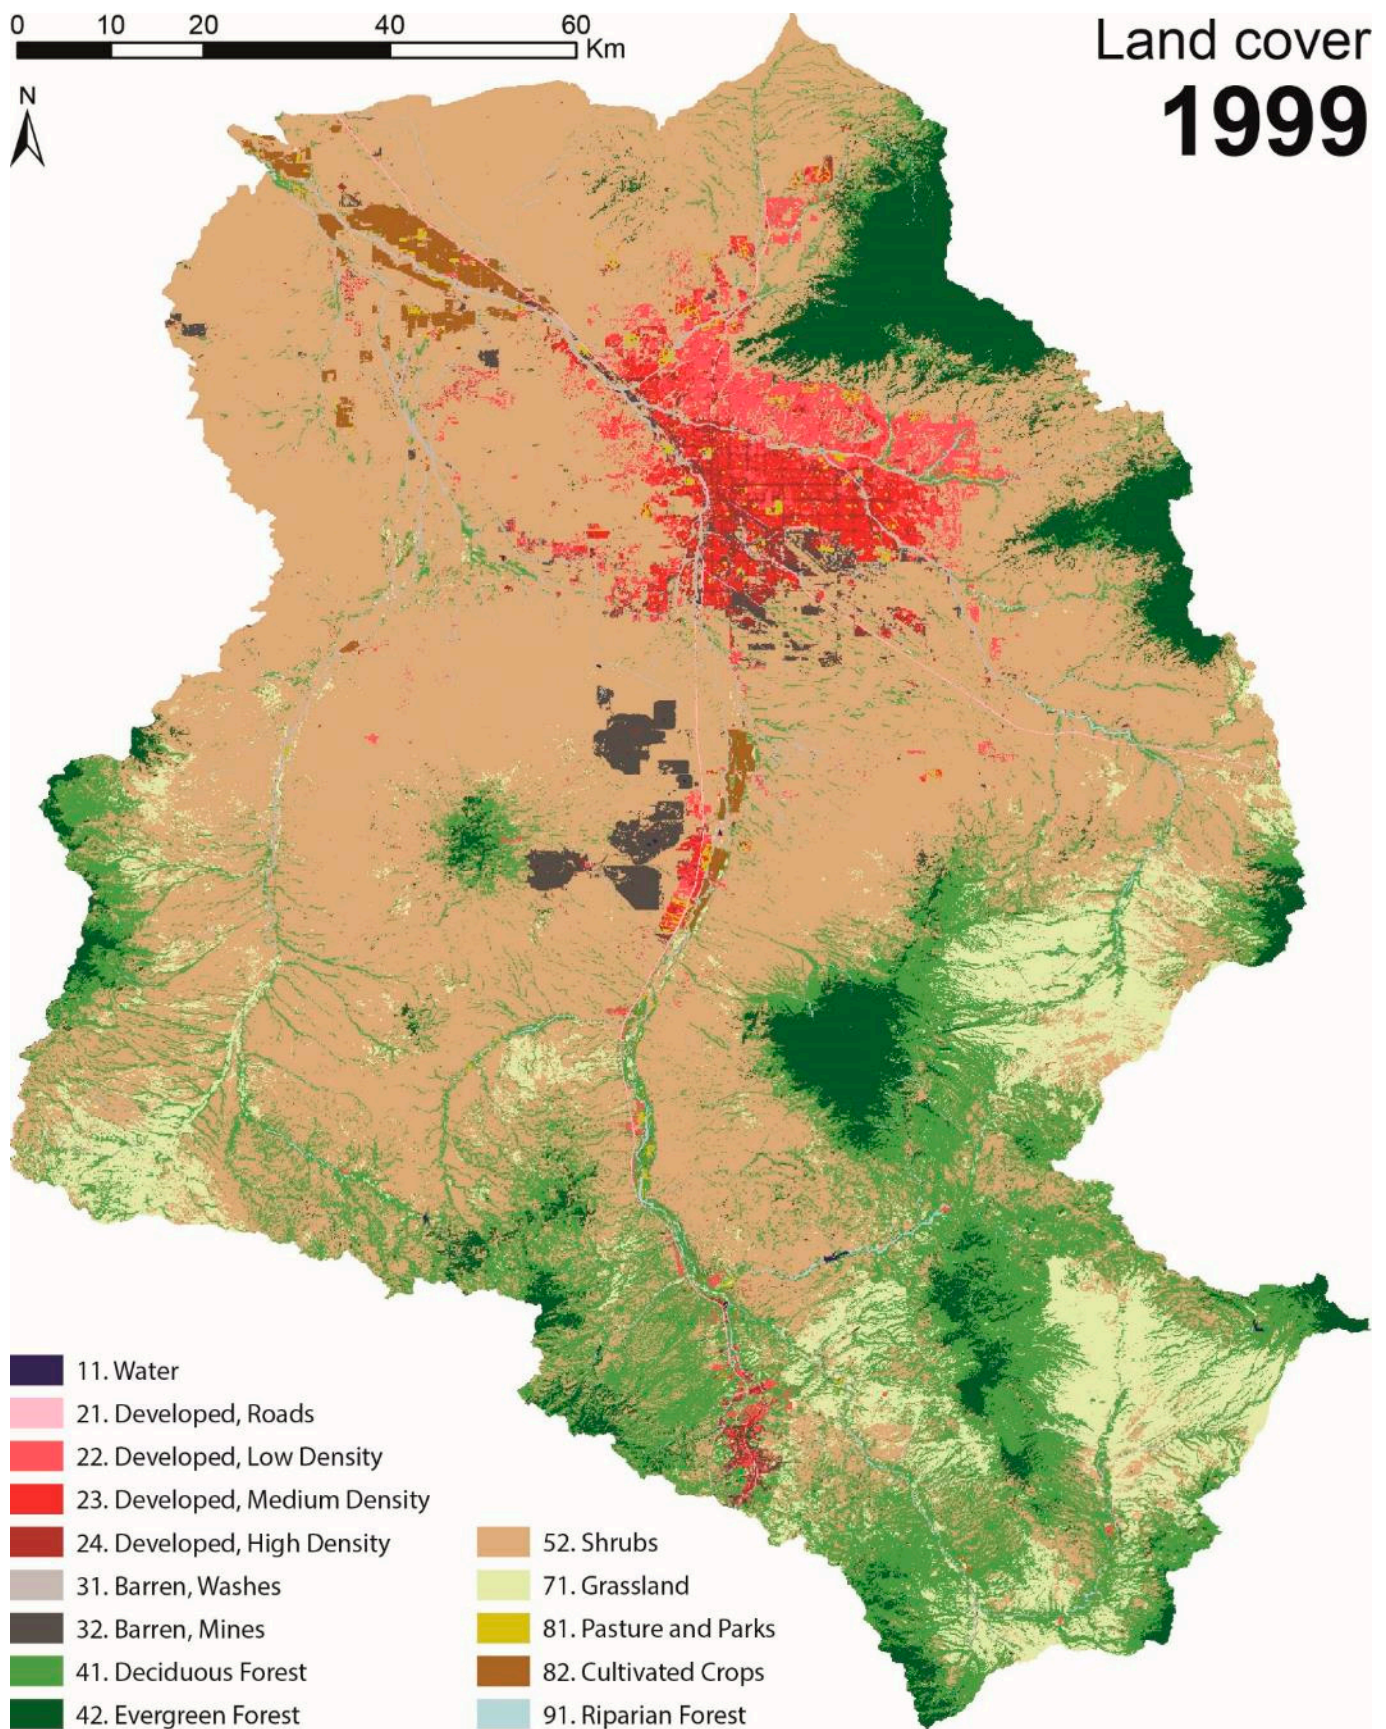



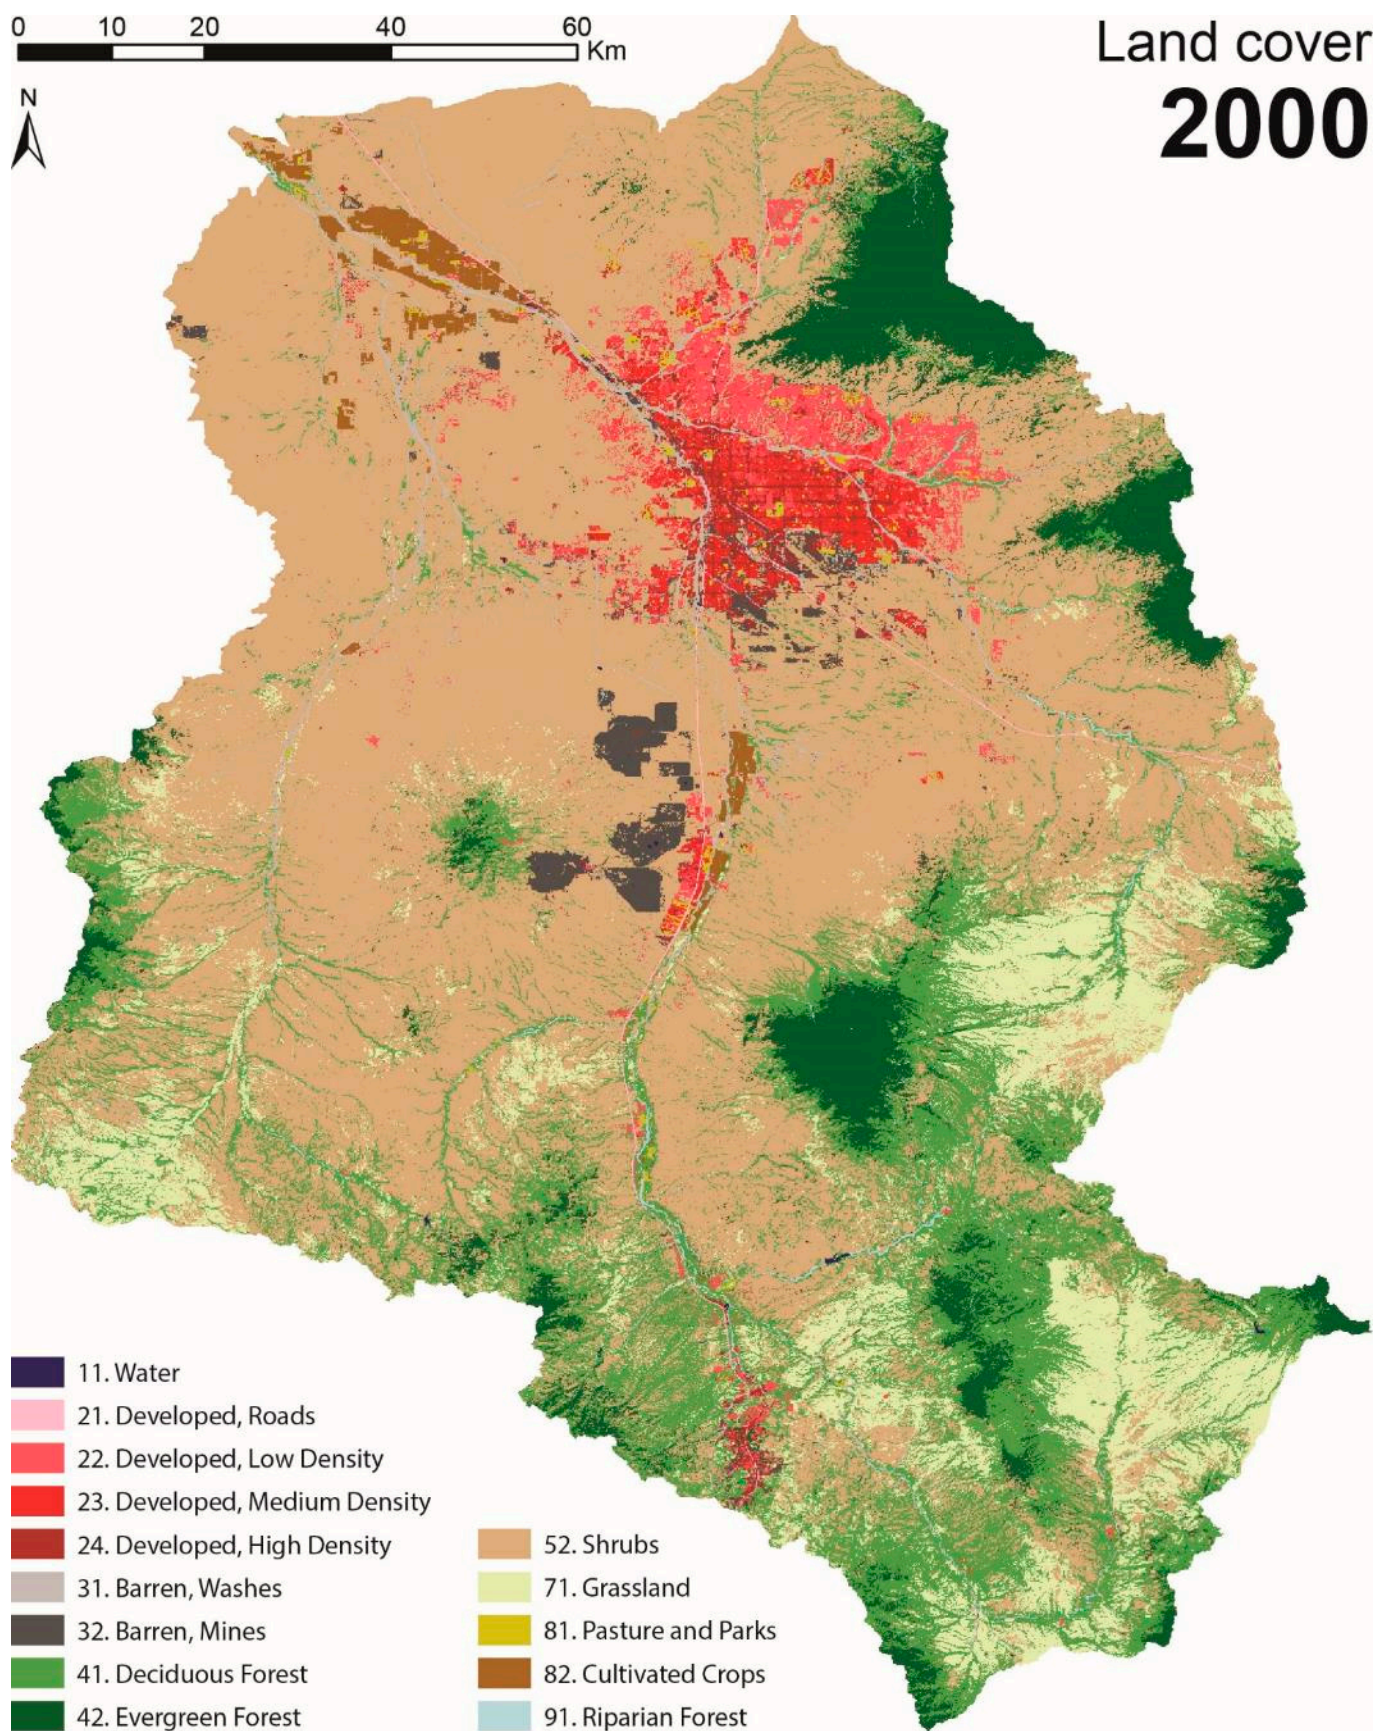



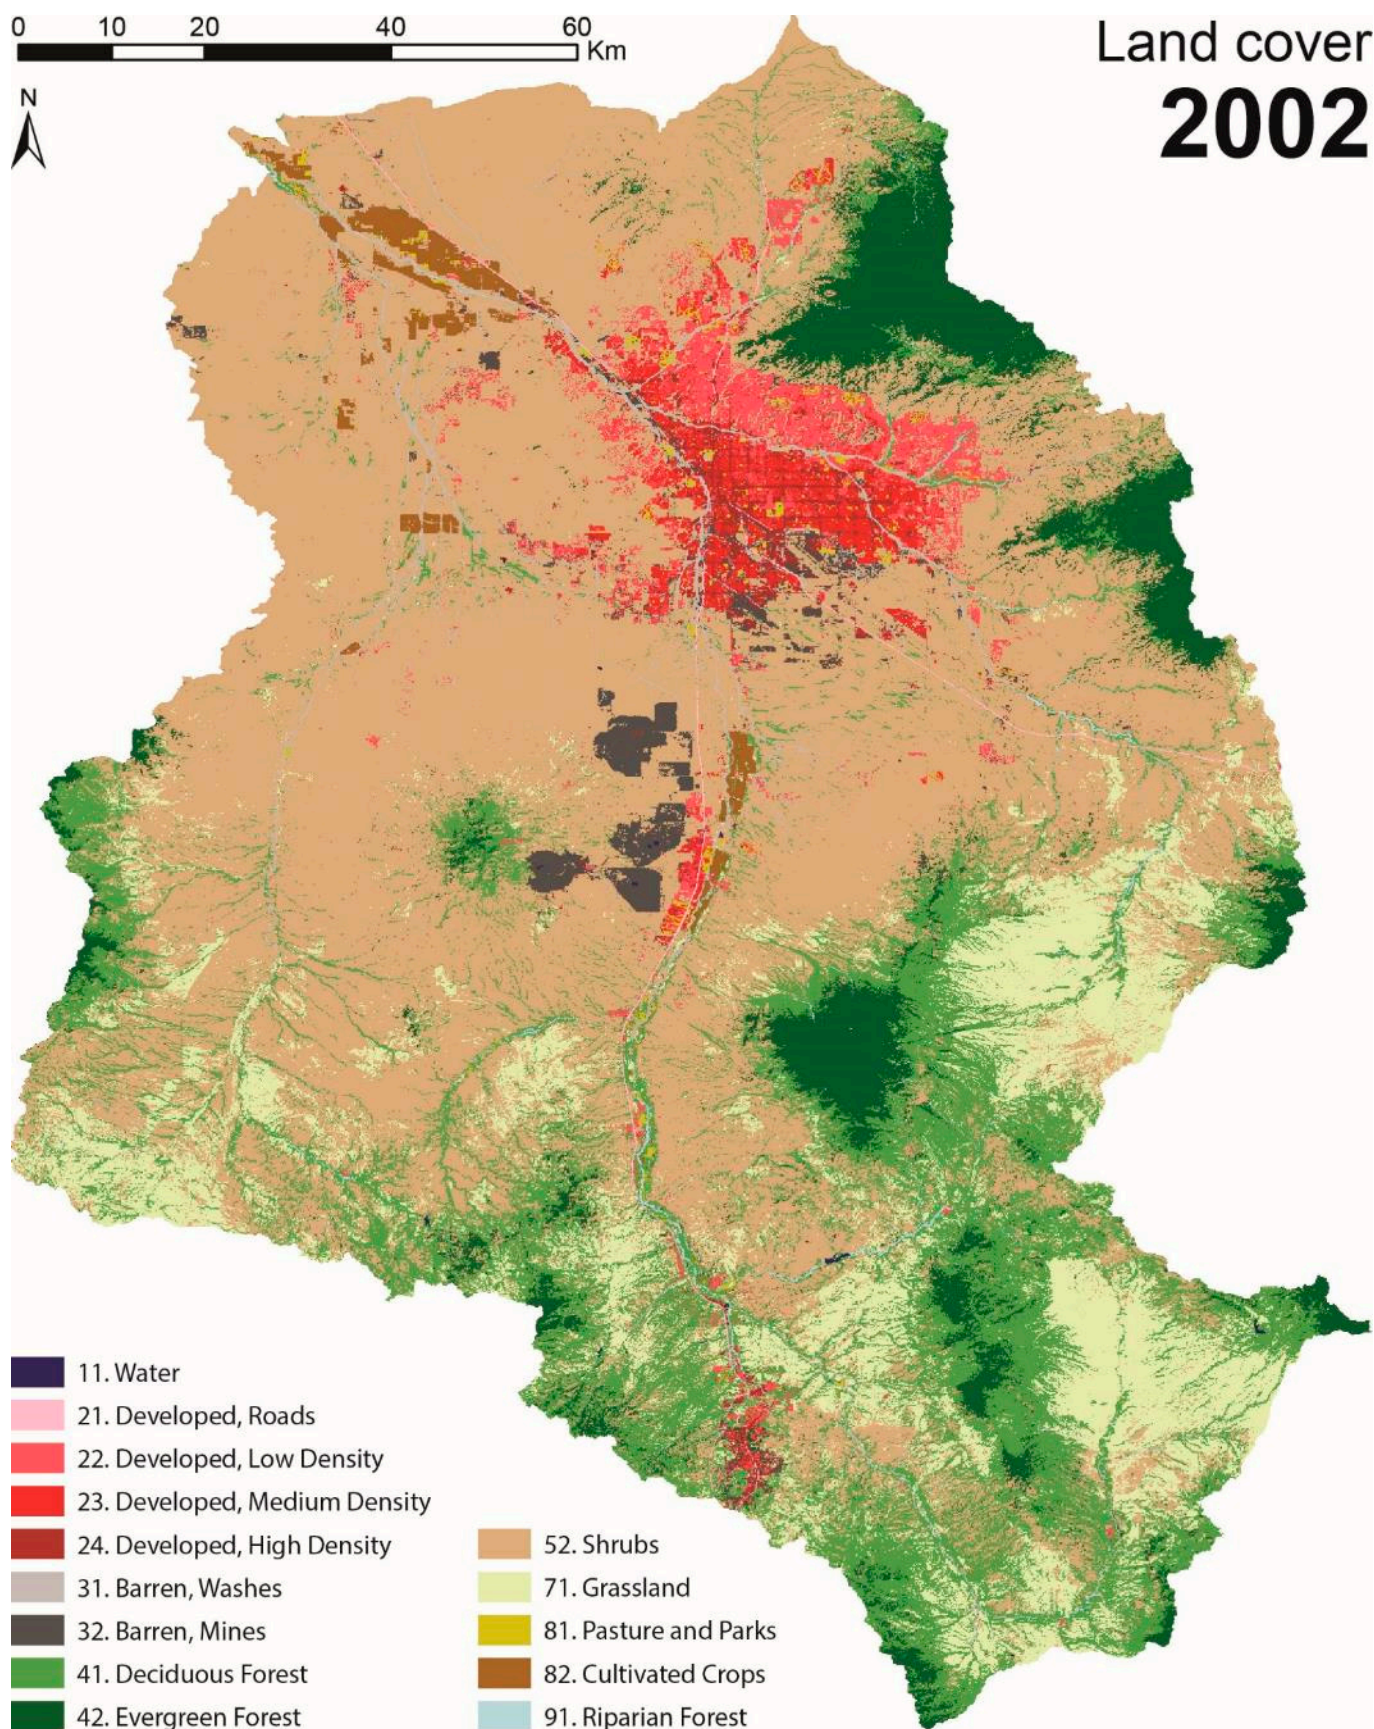



0 10 20 40 60 Km

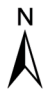

# Land cover 2002

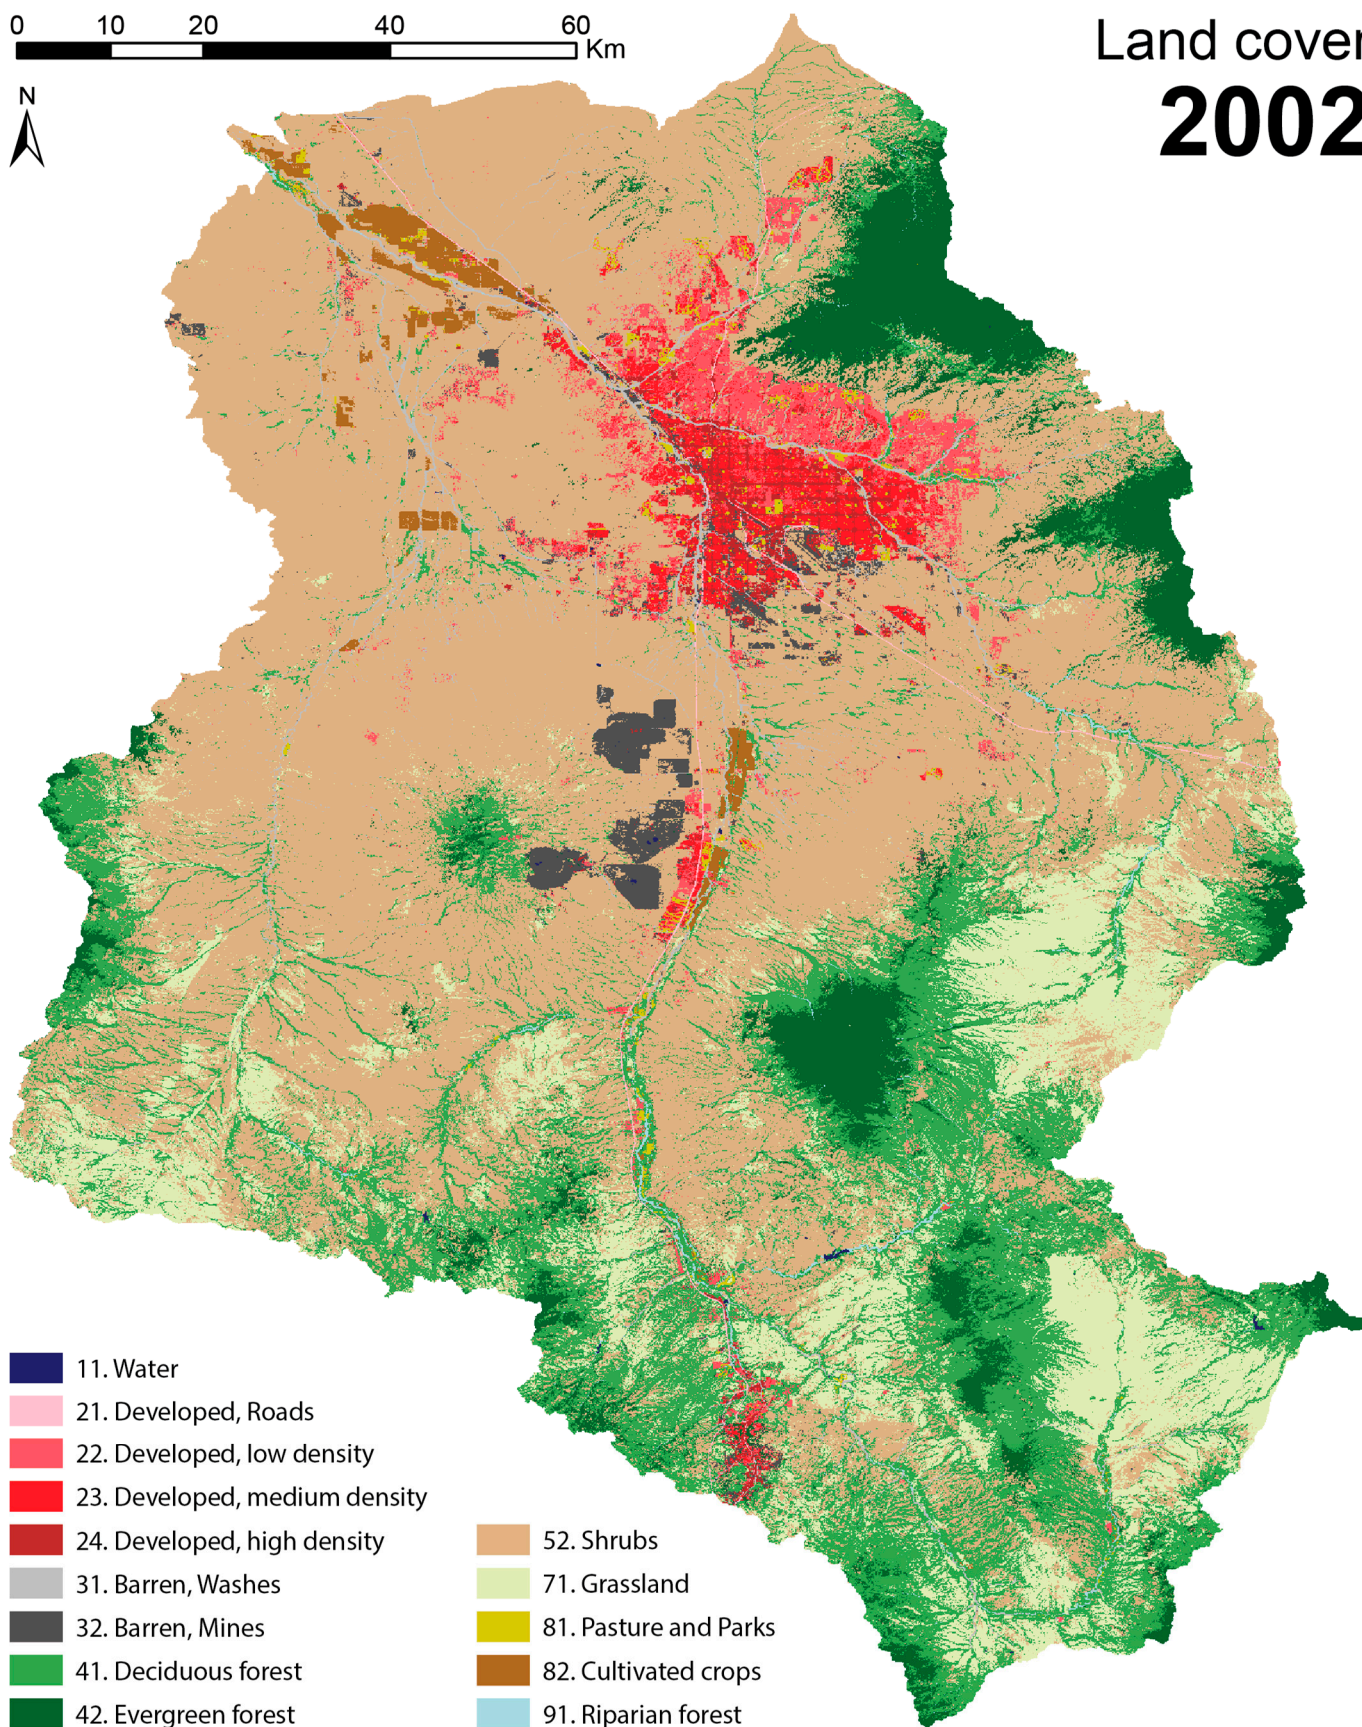



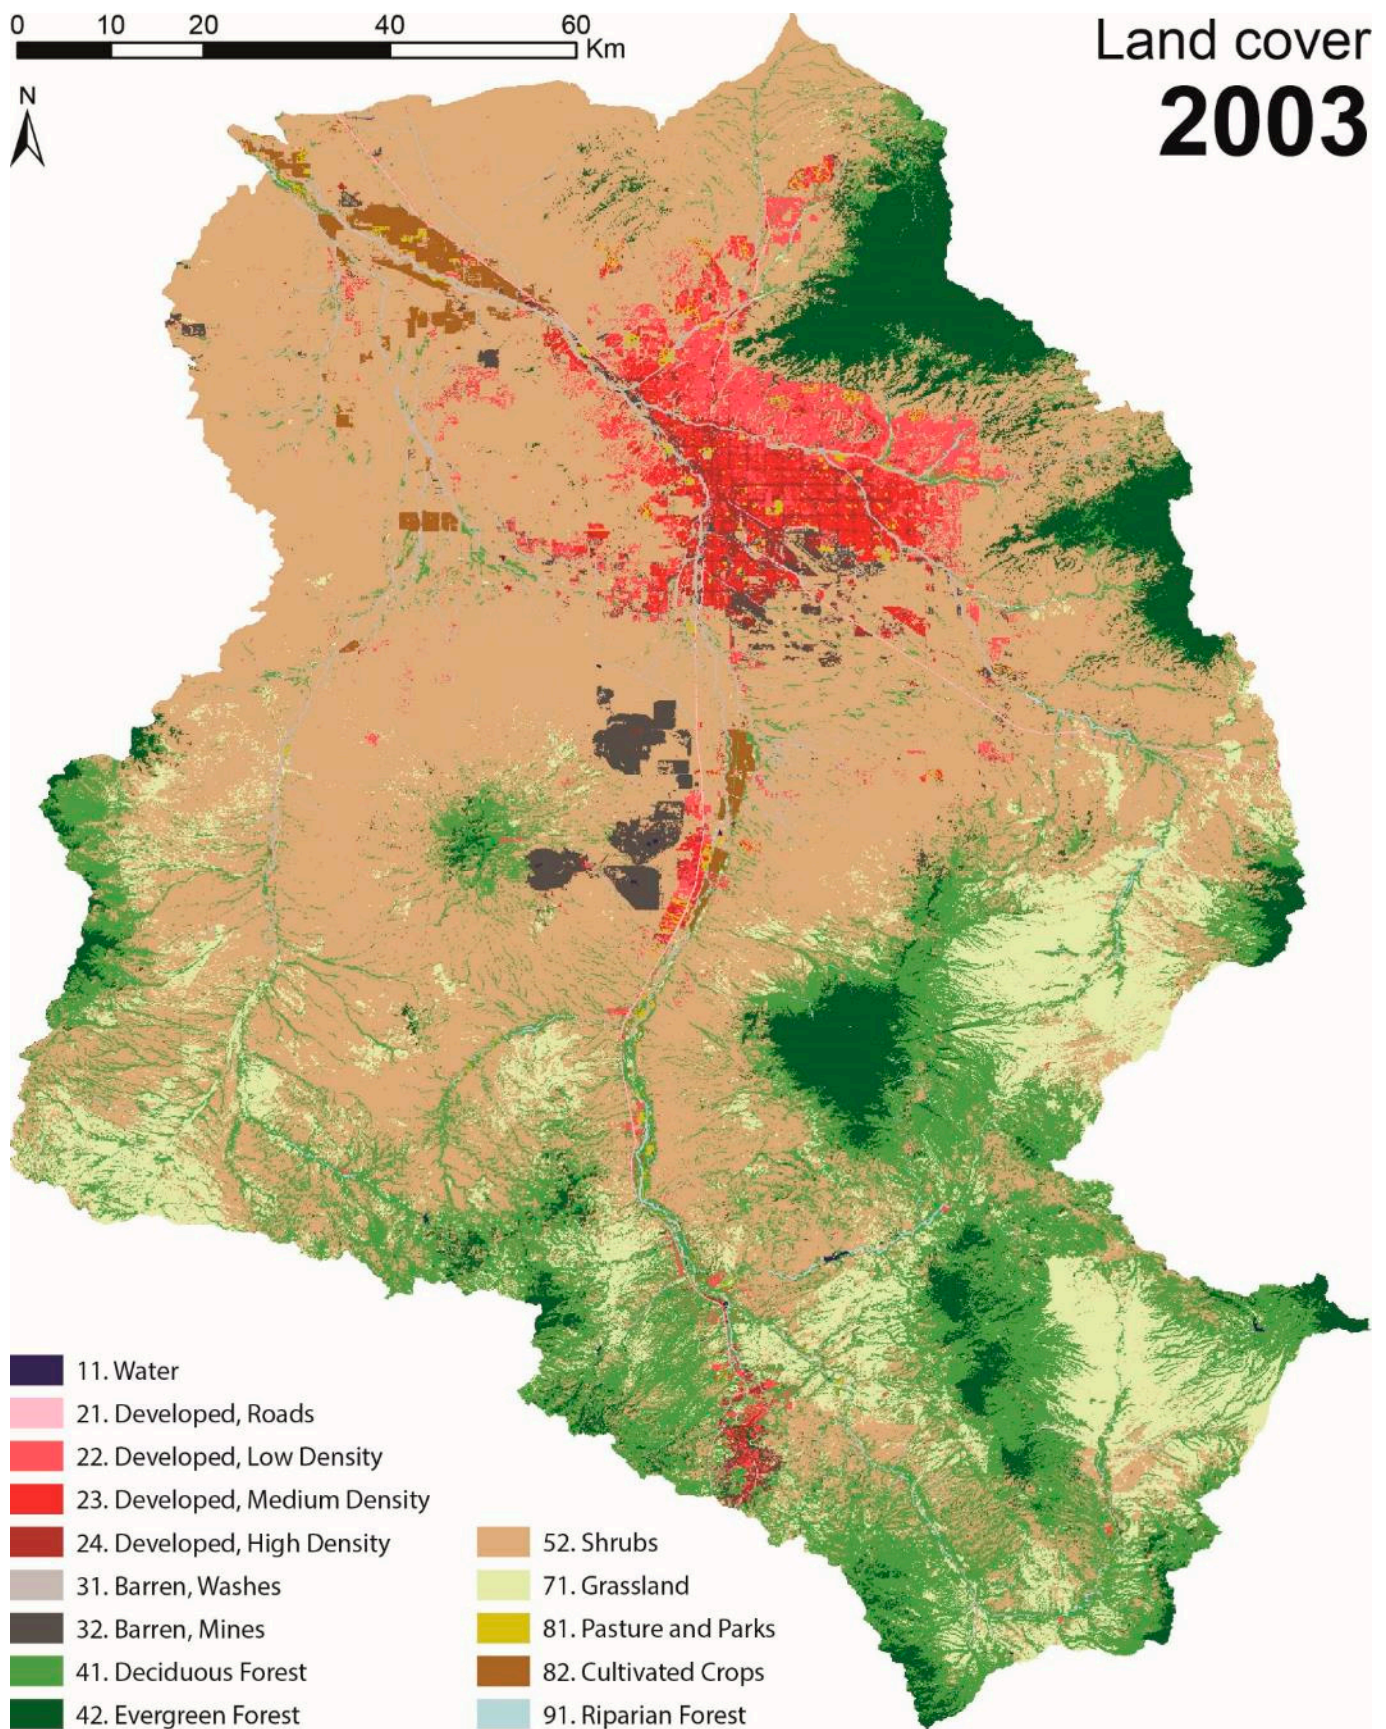



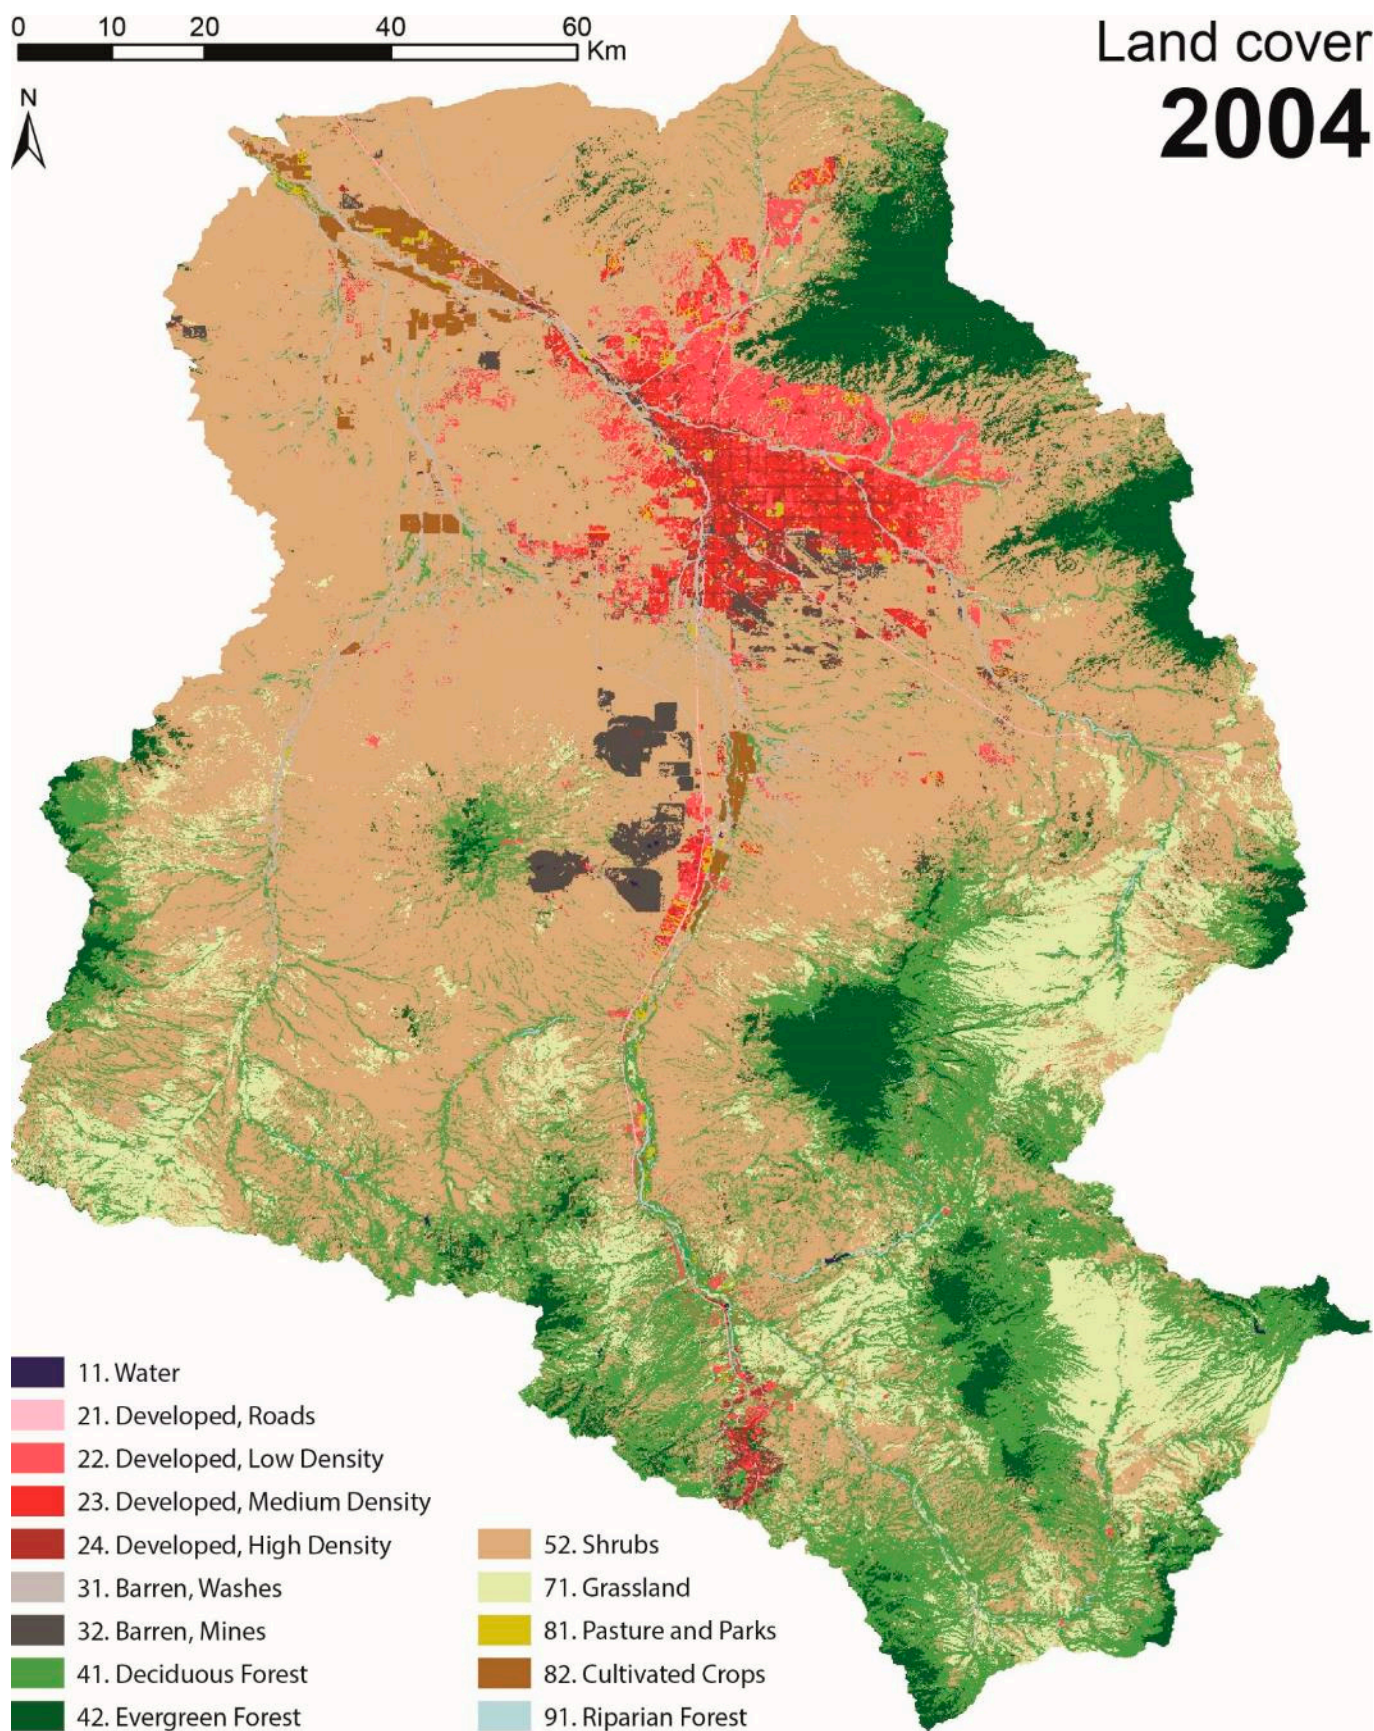



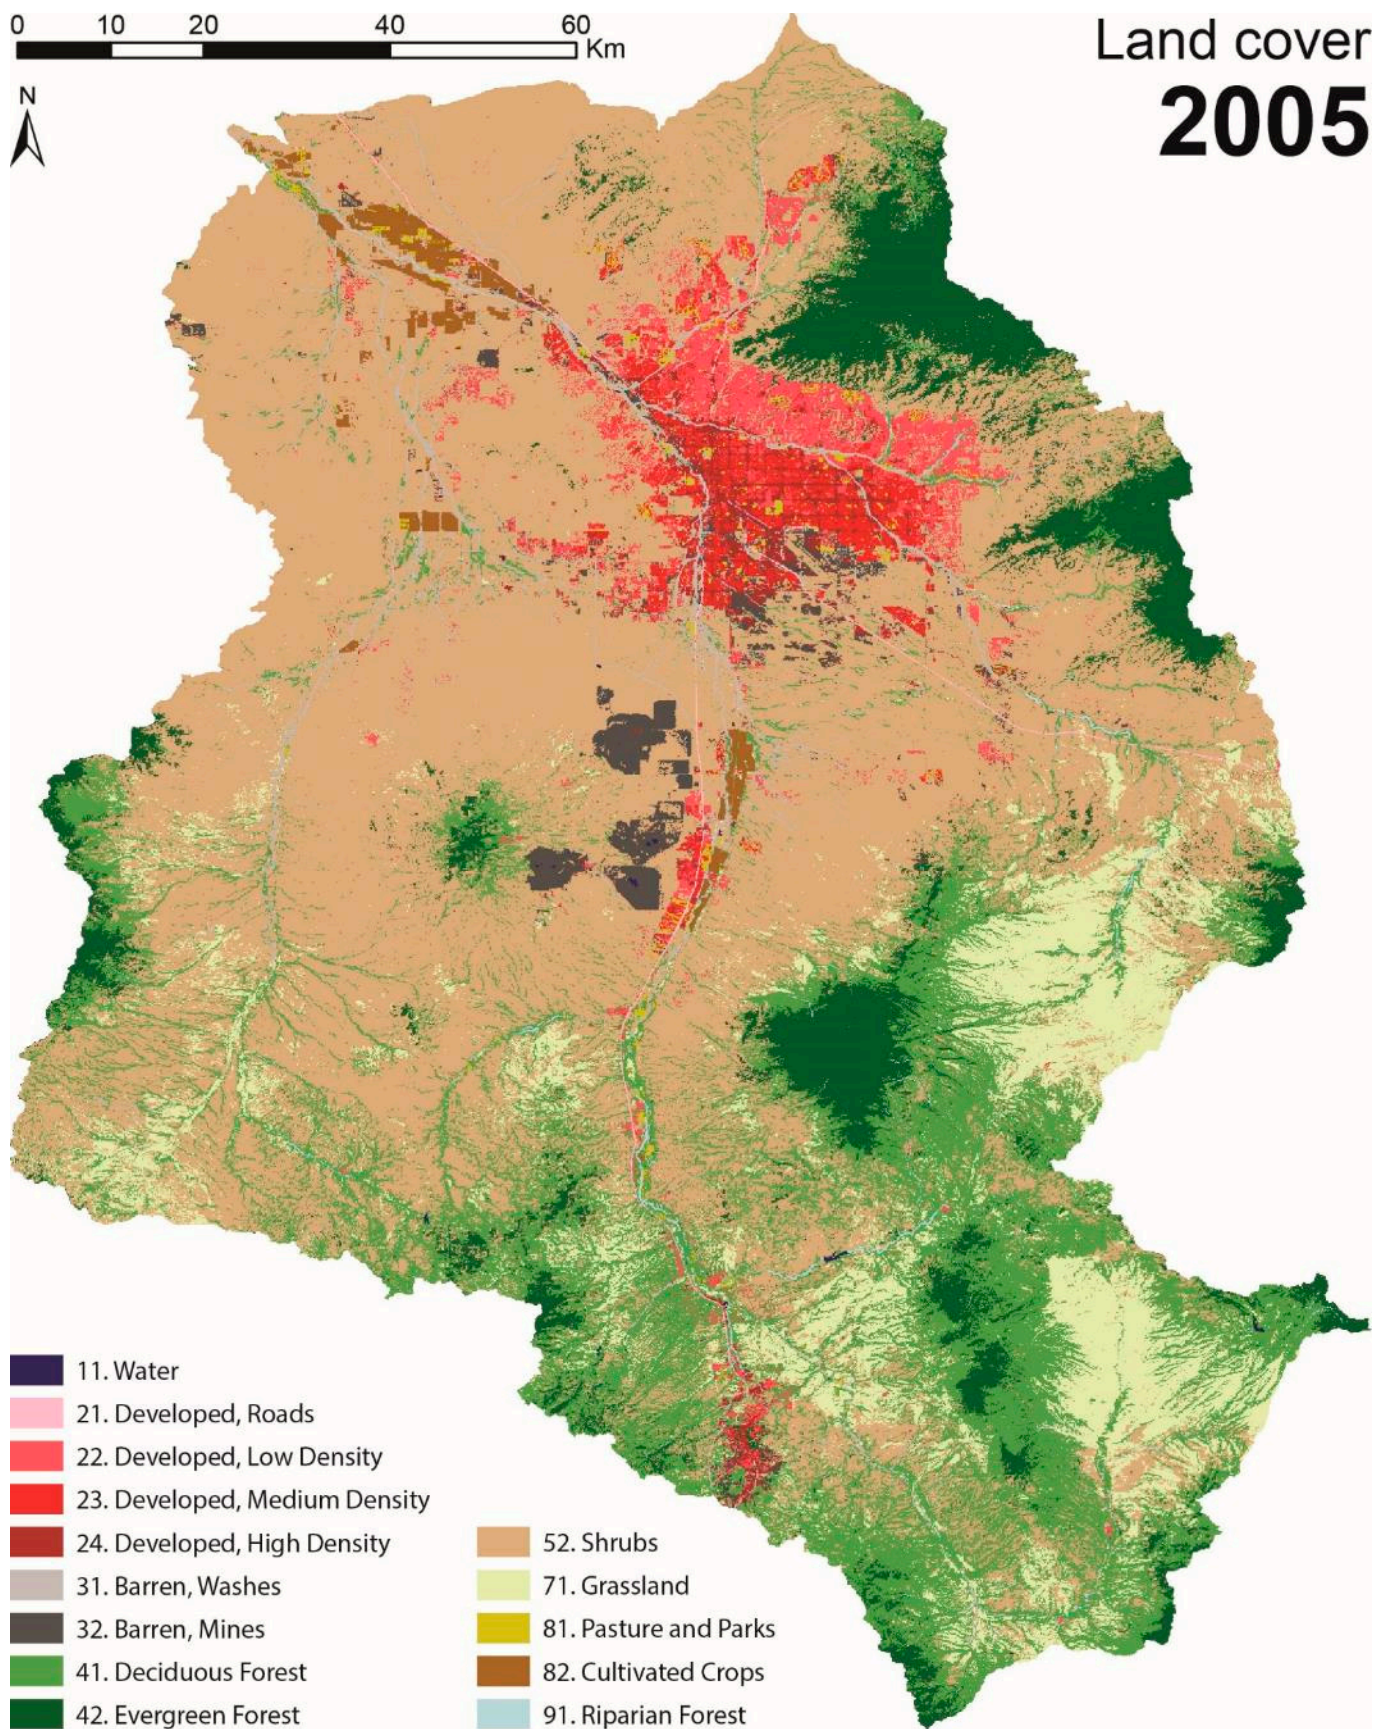



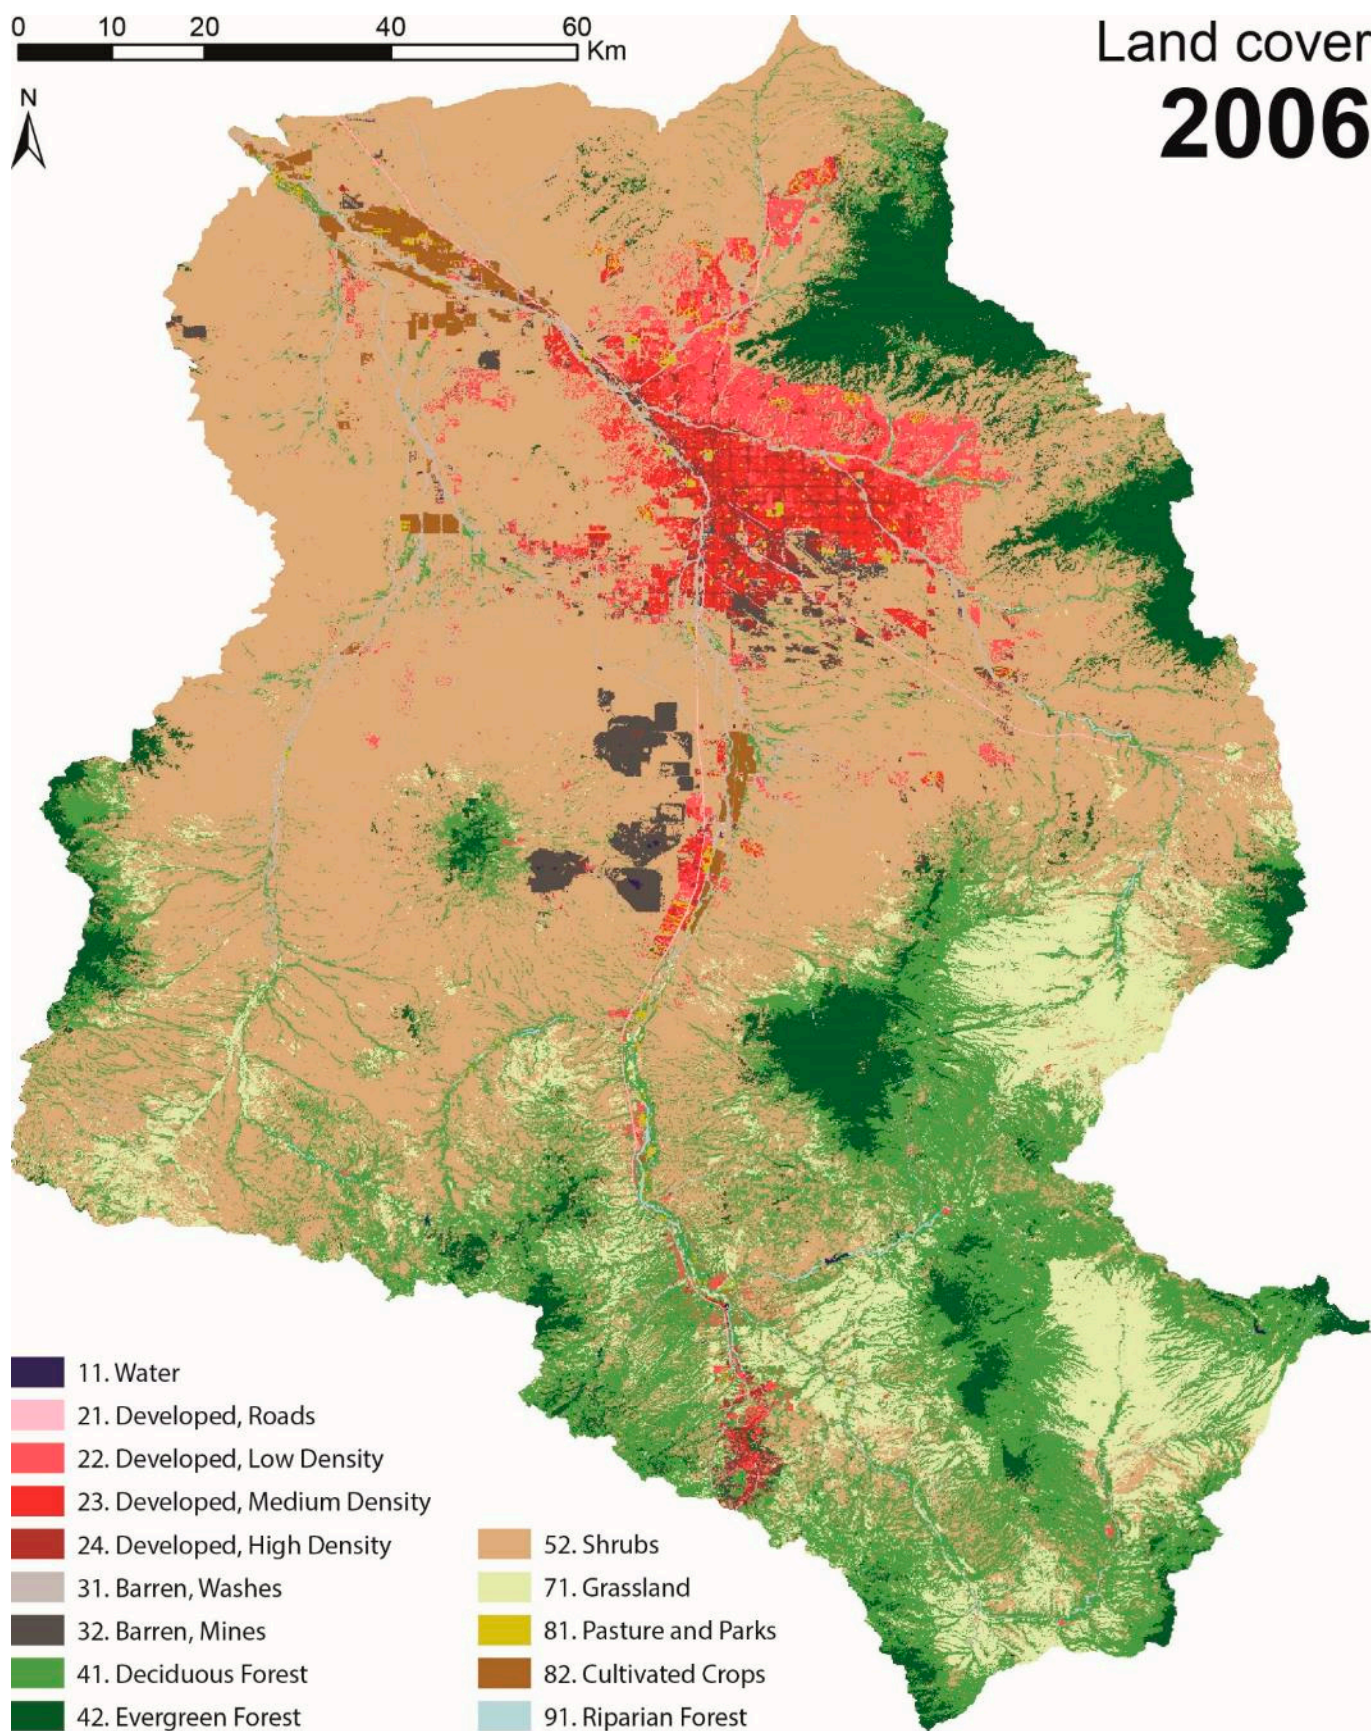



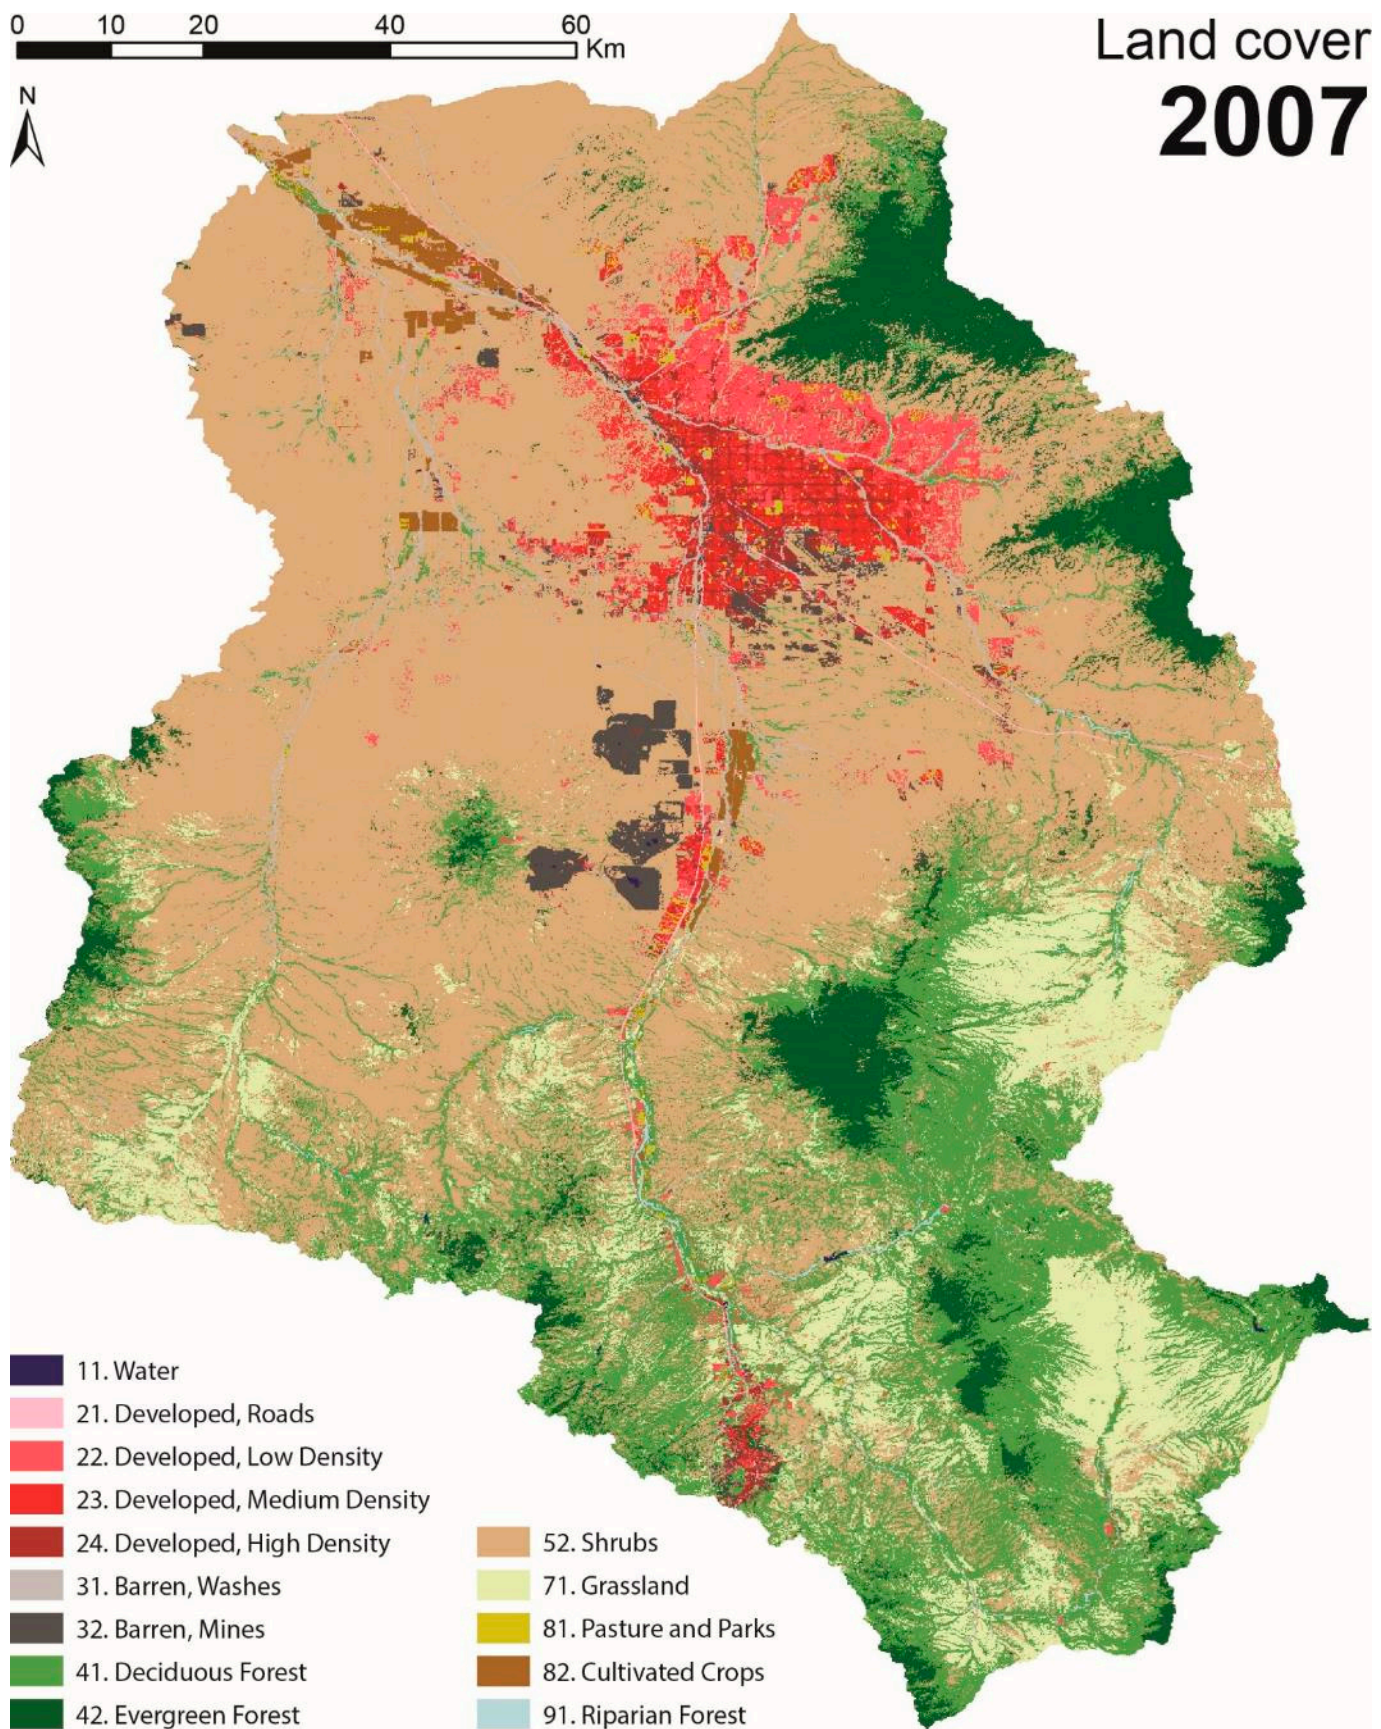



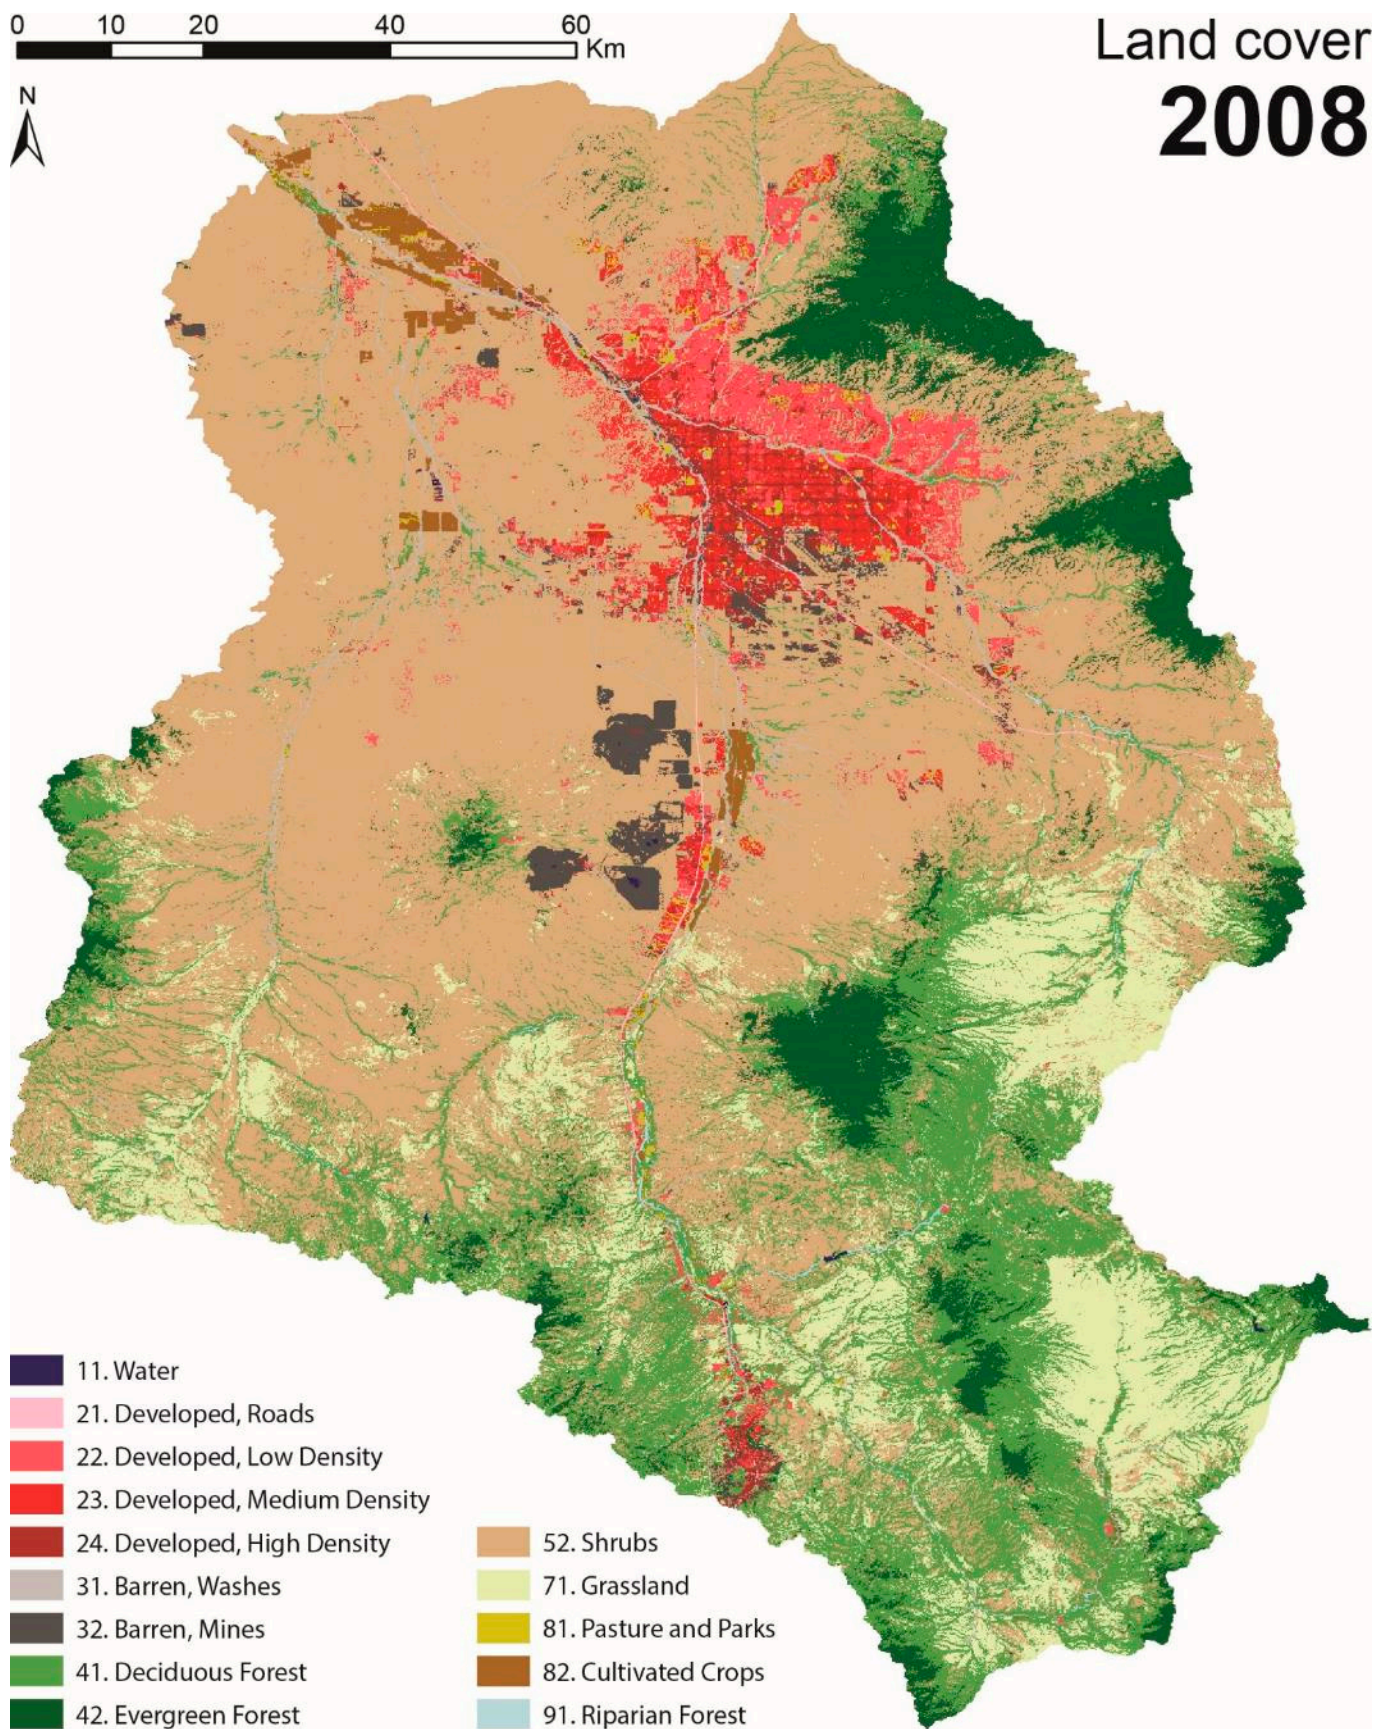



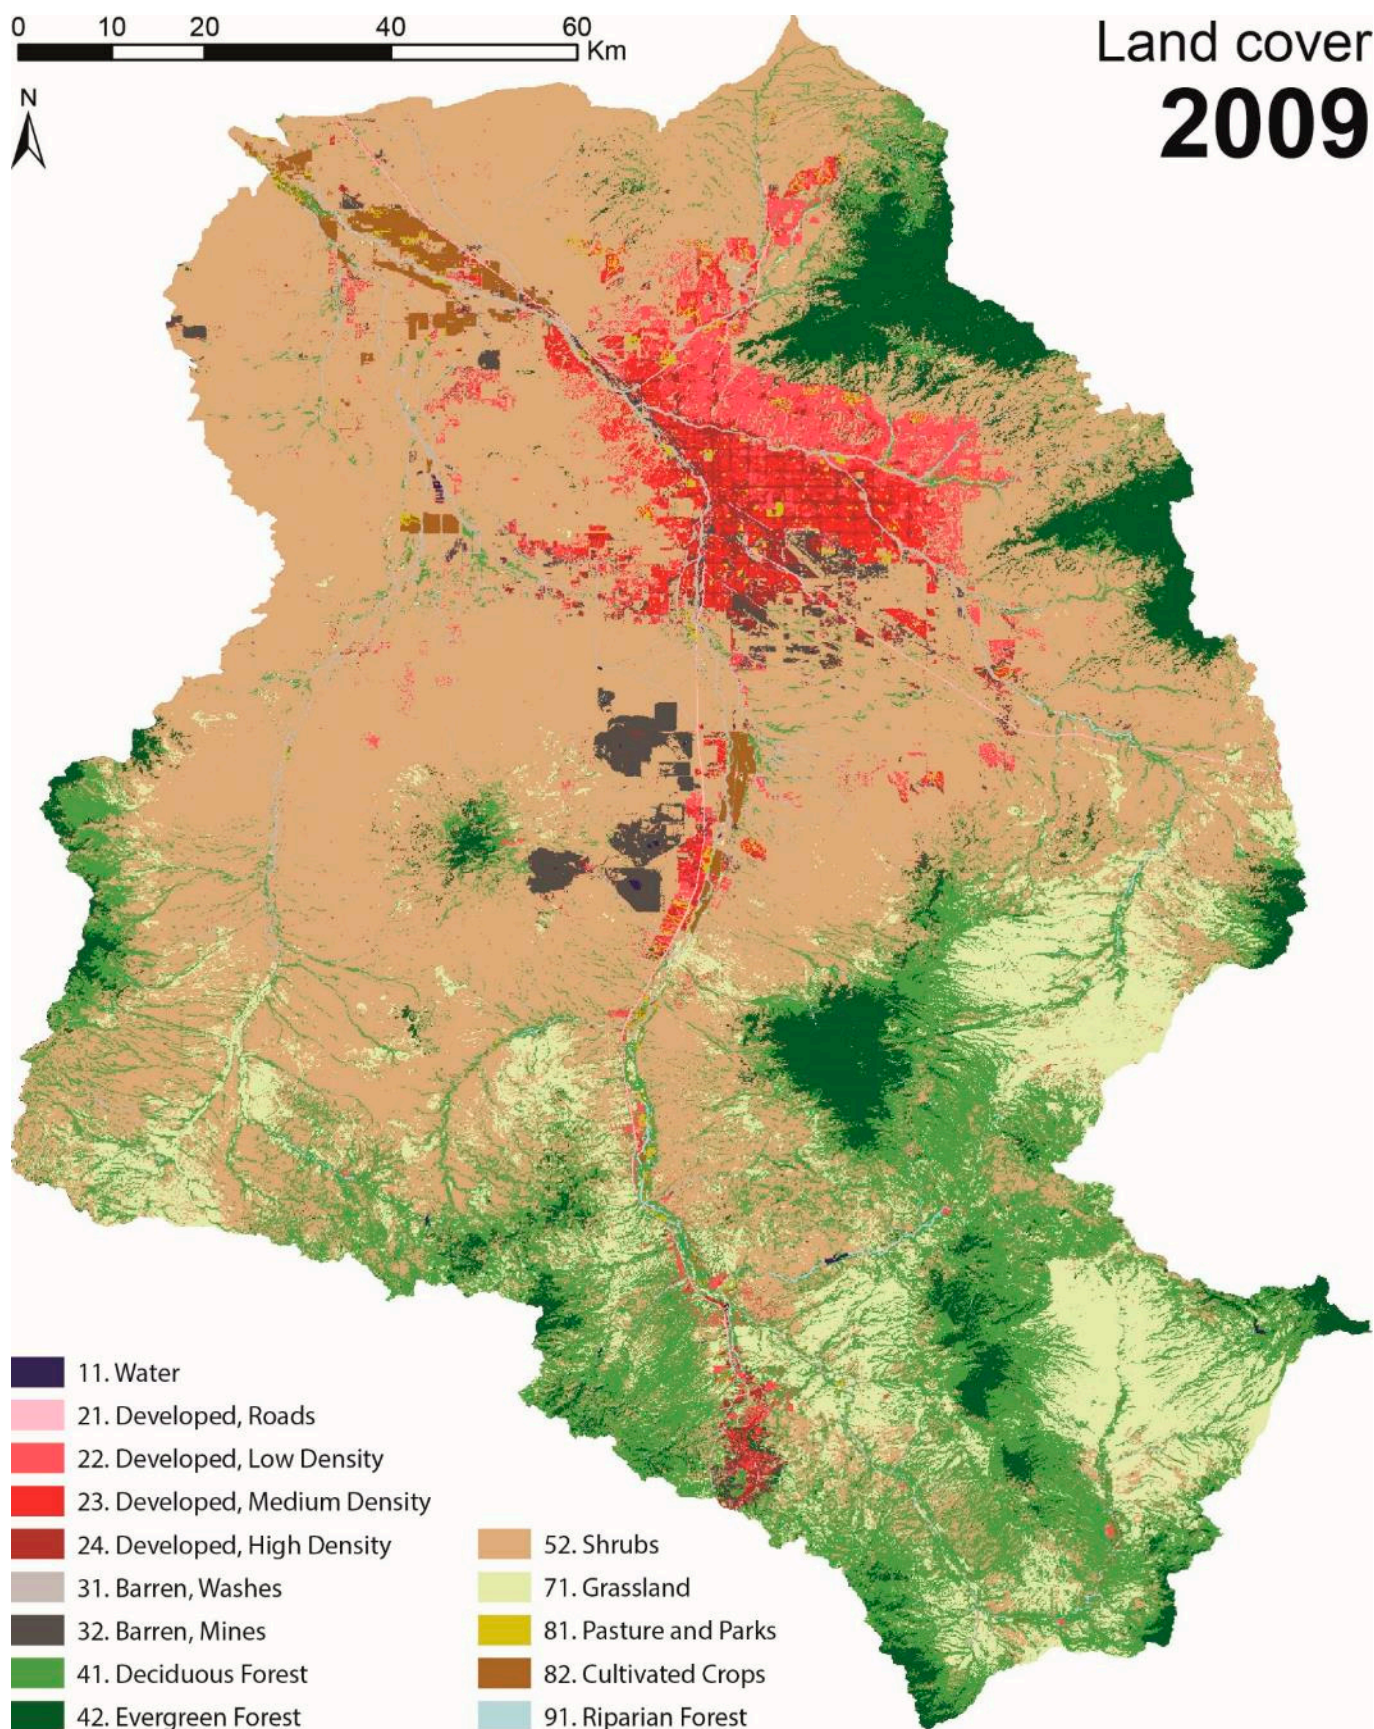



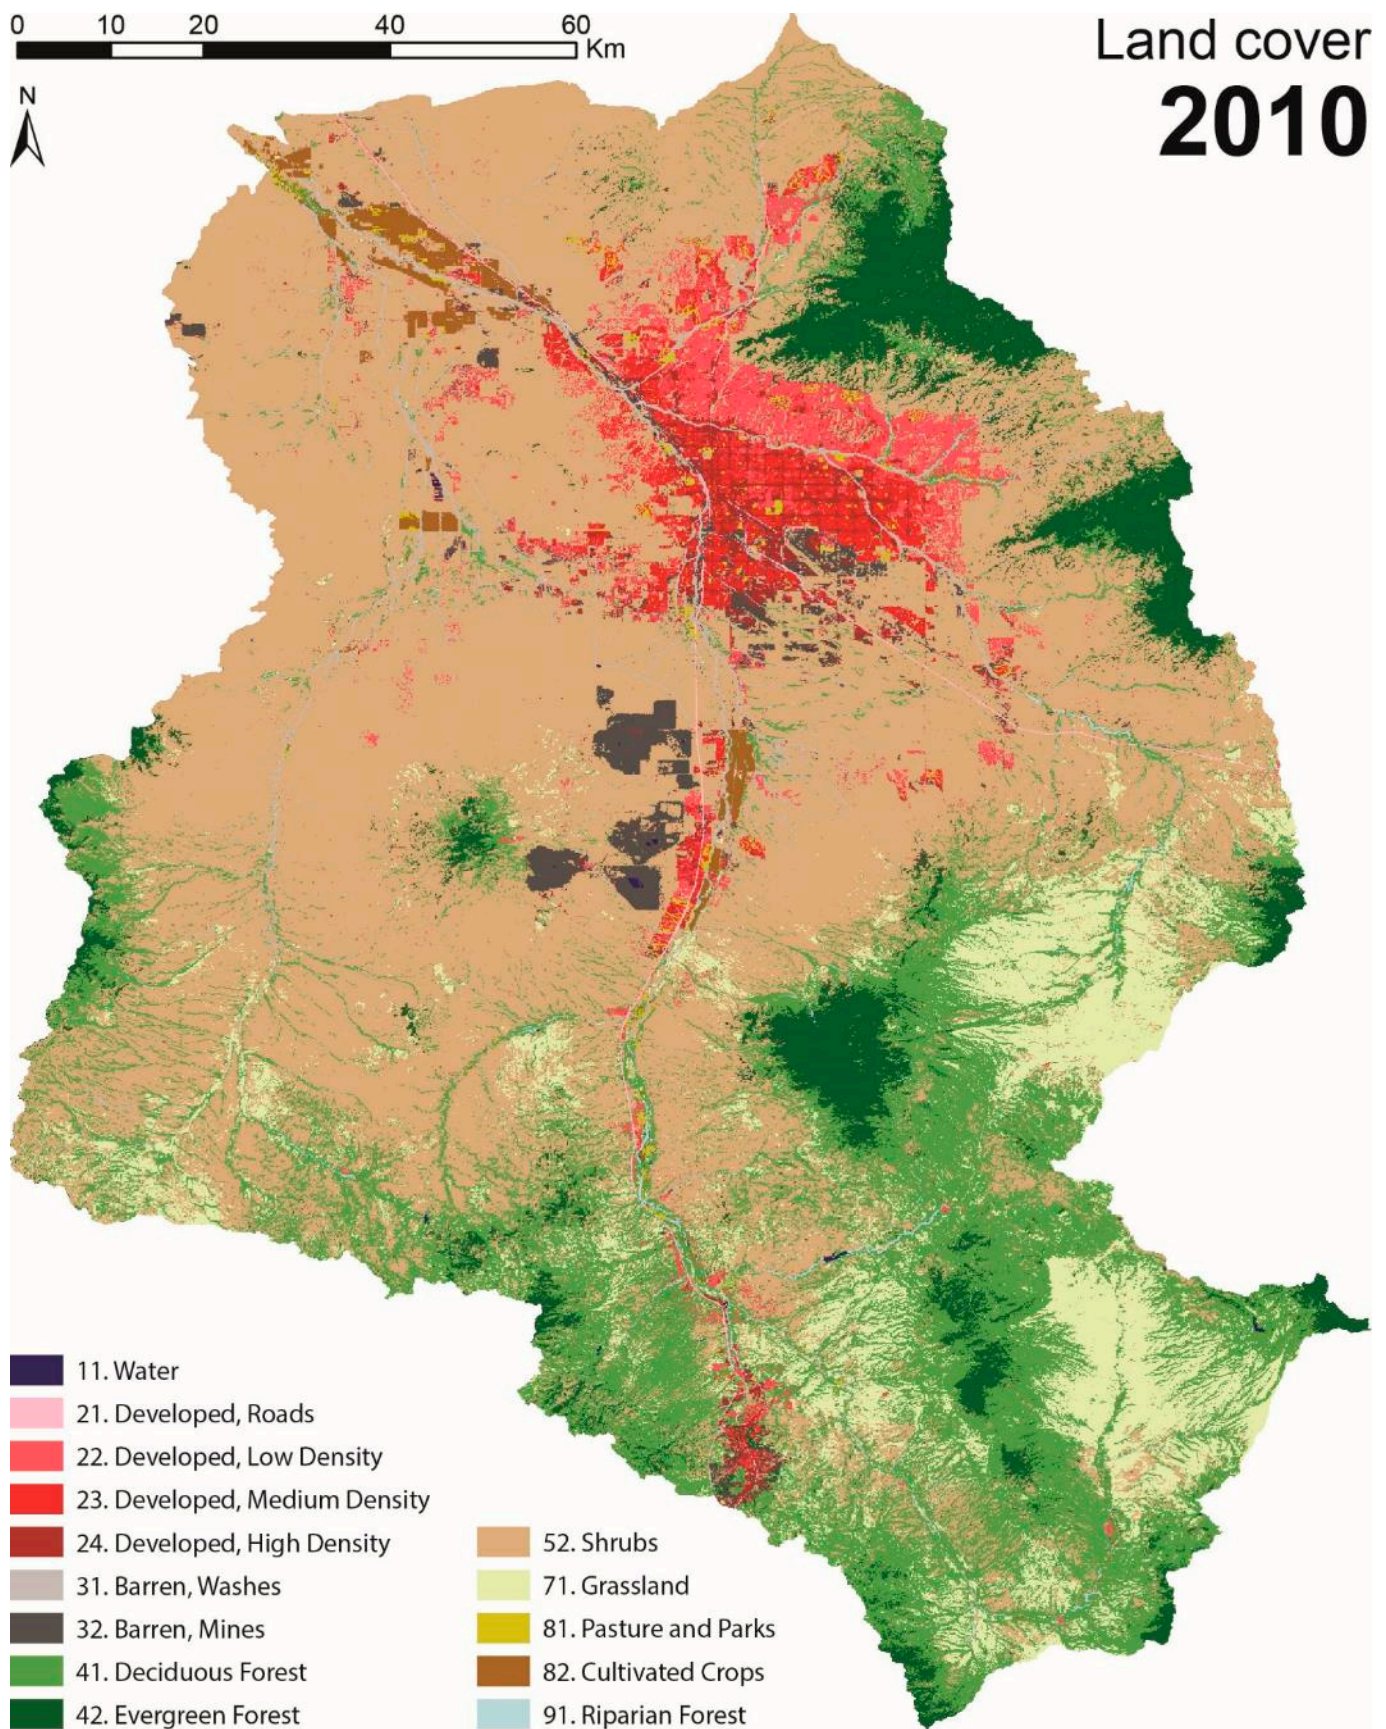



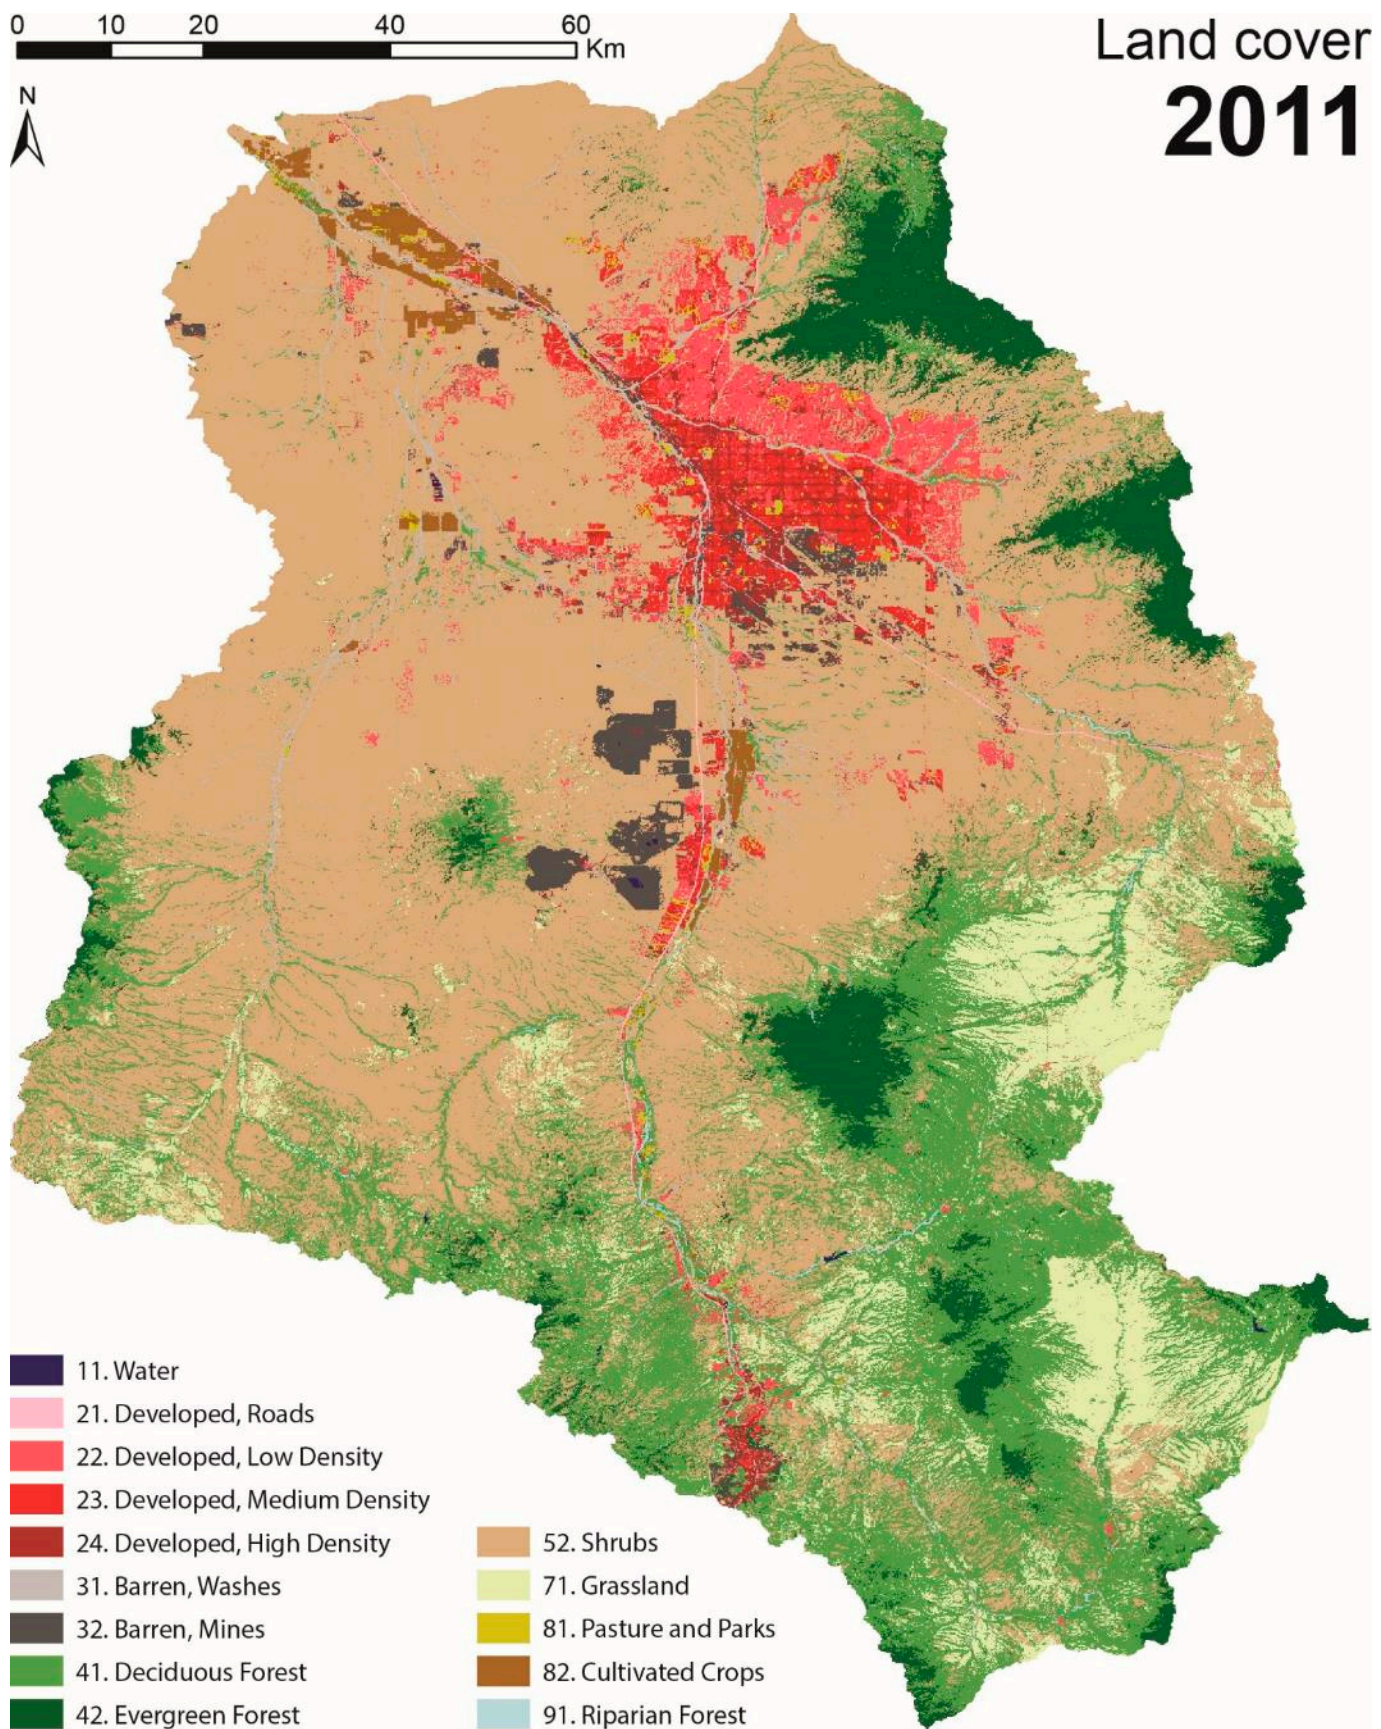



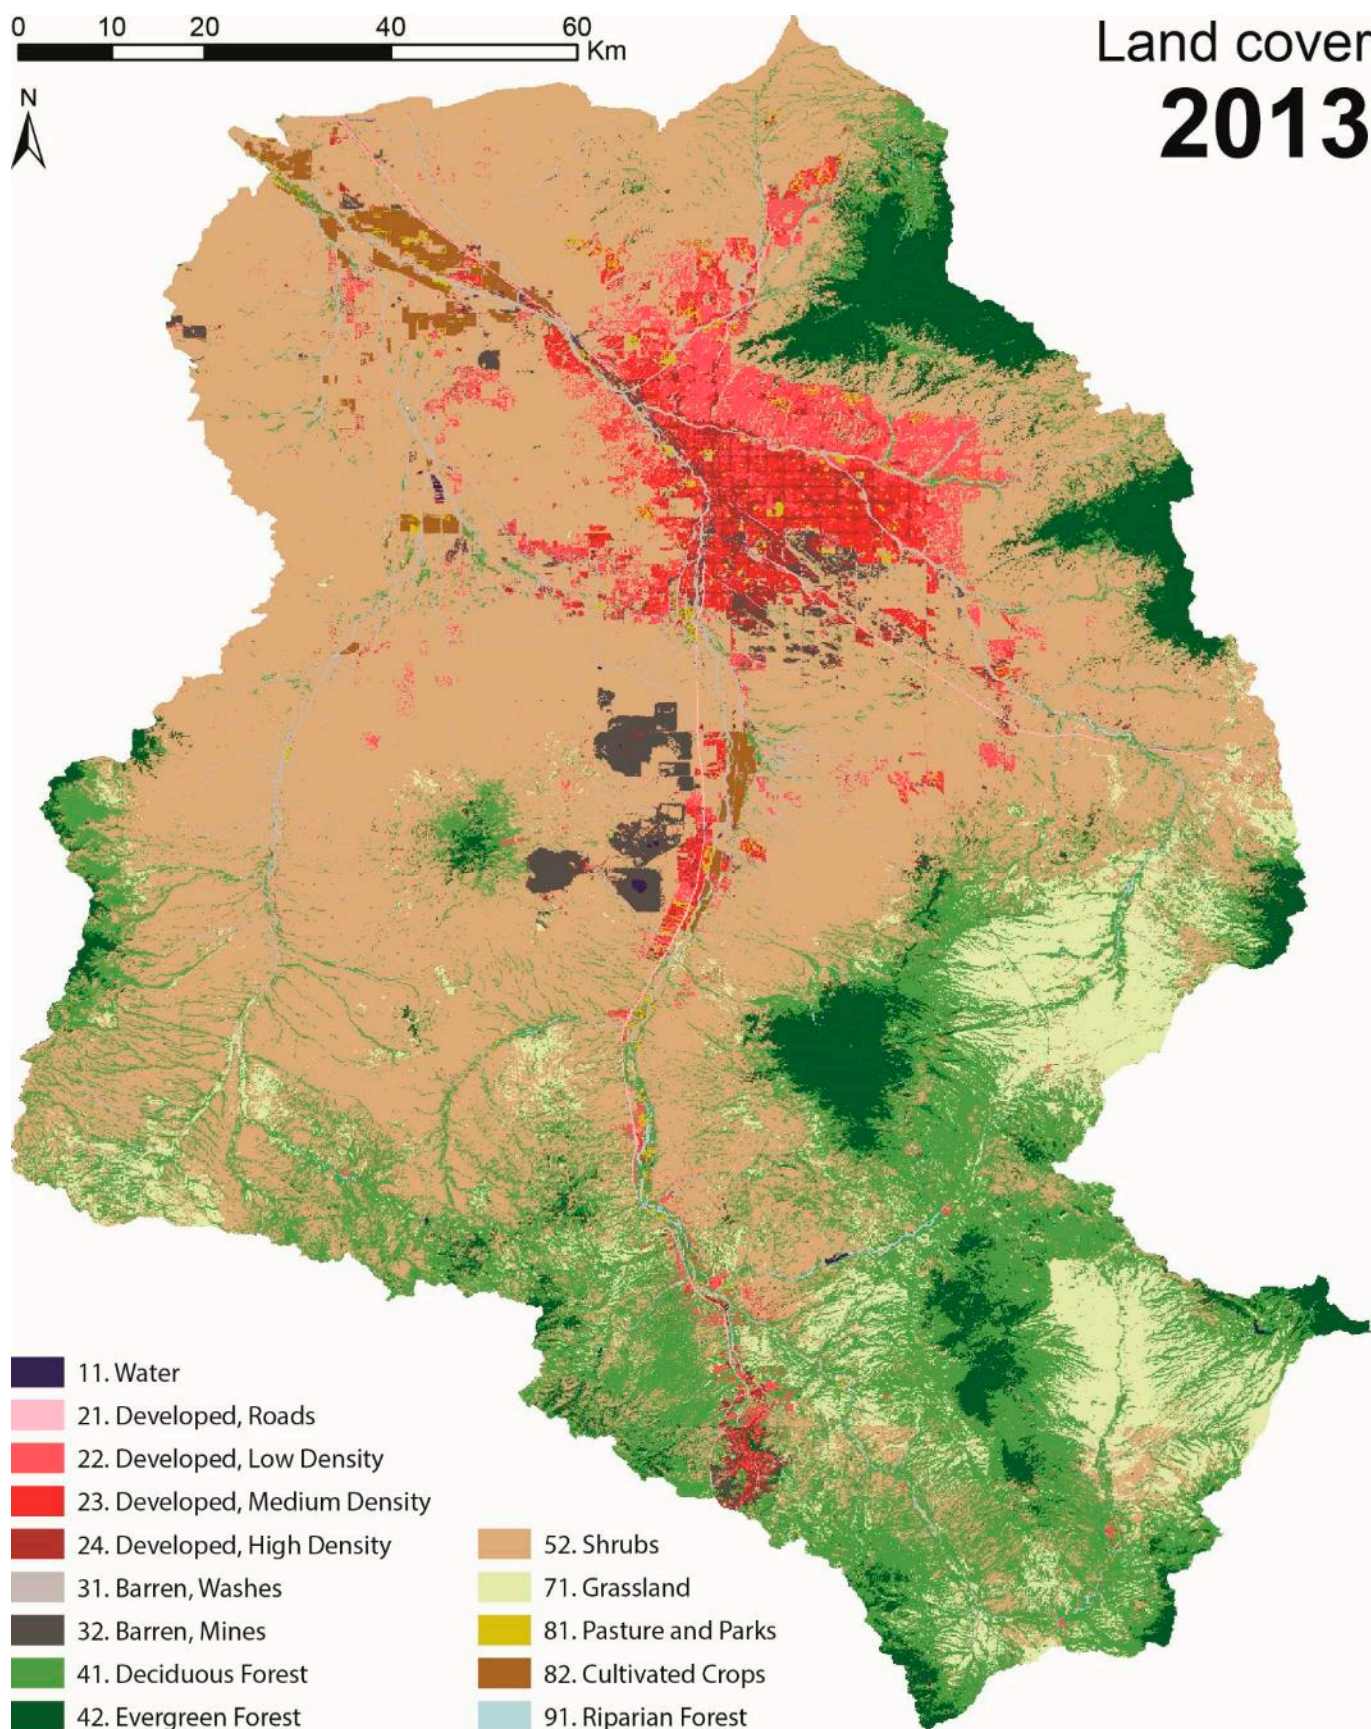



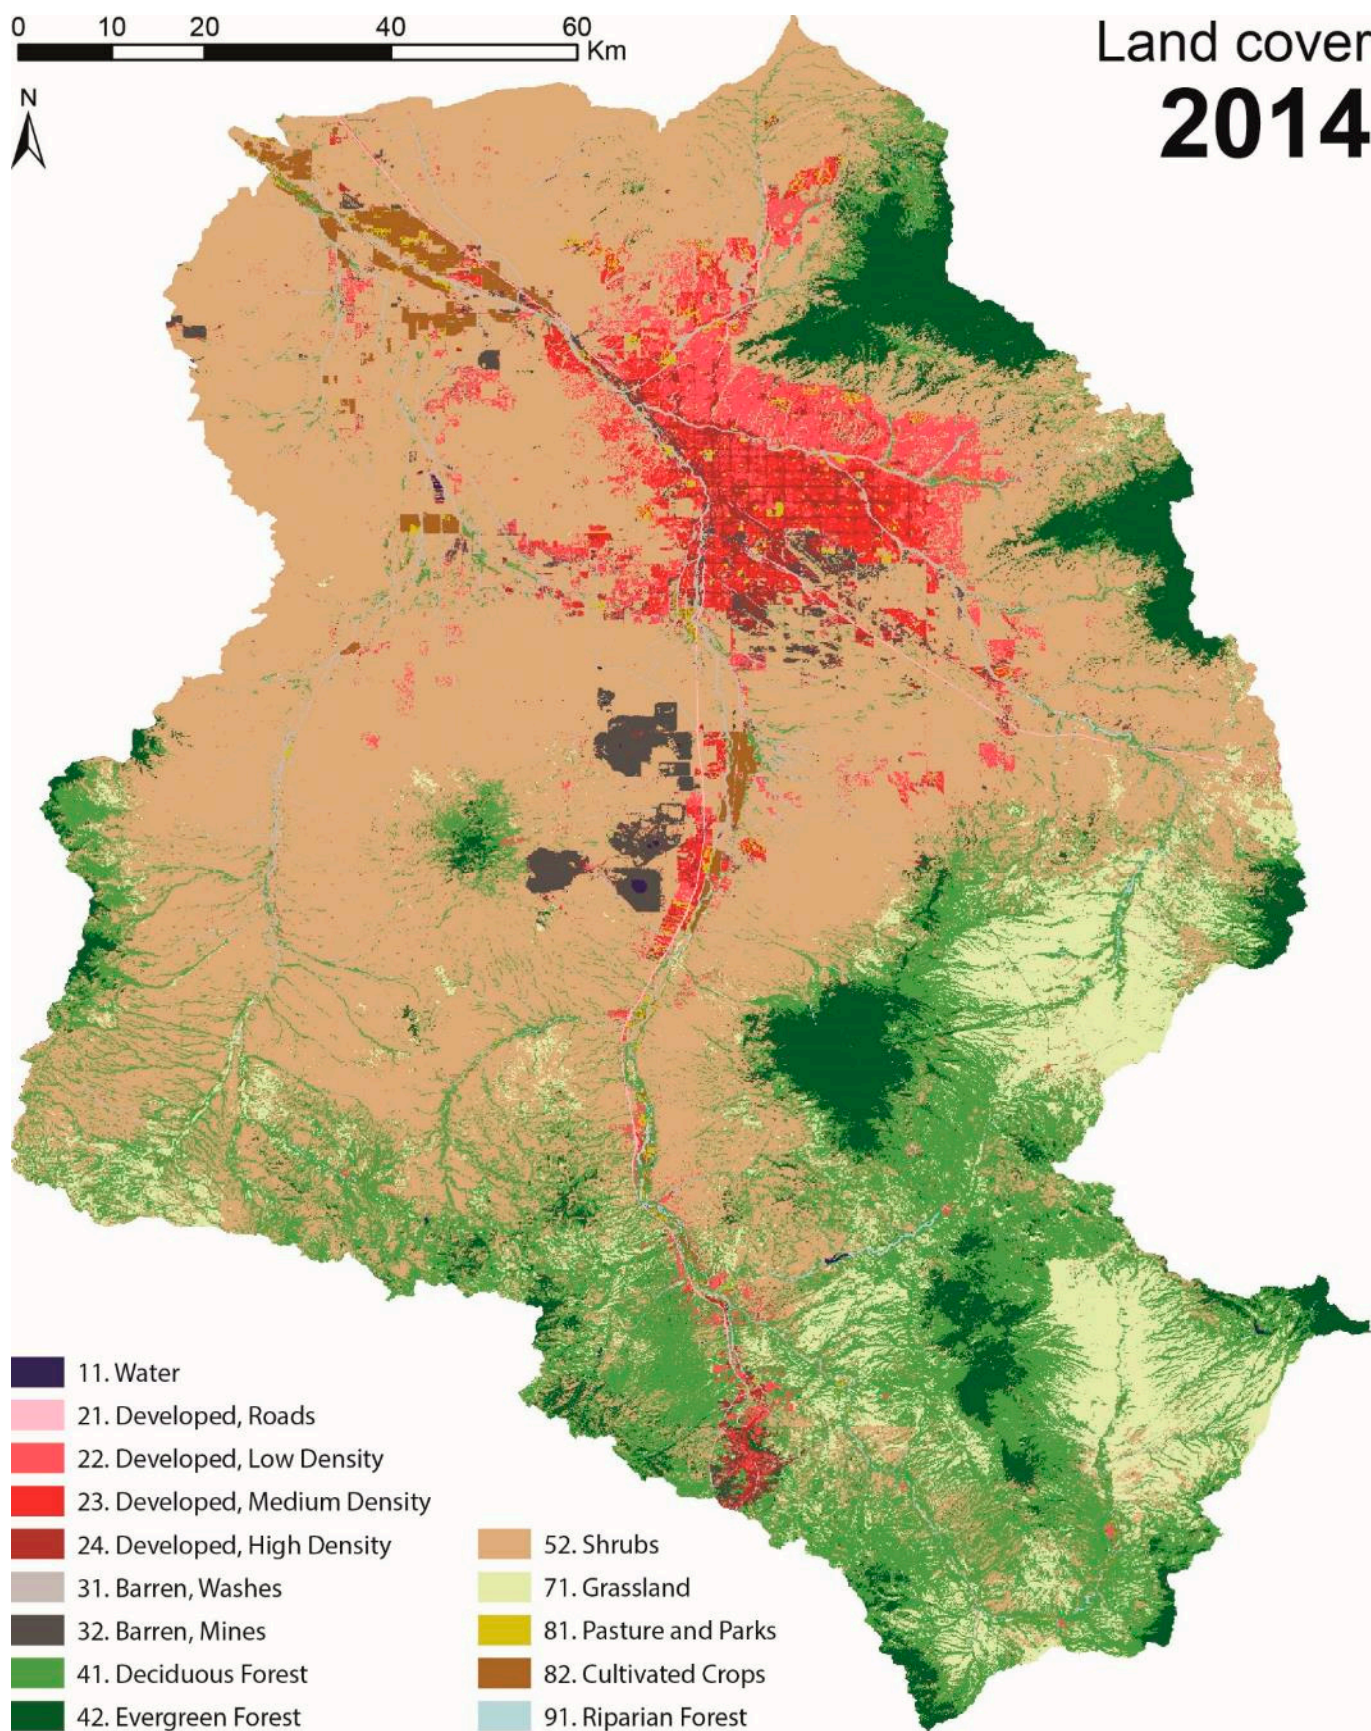



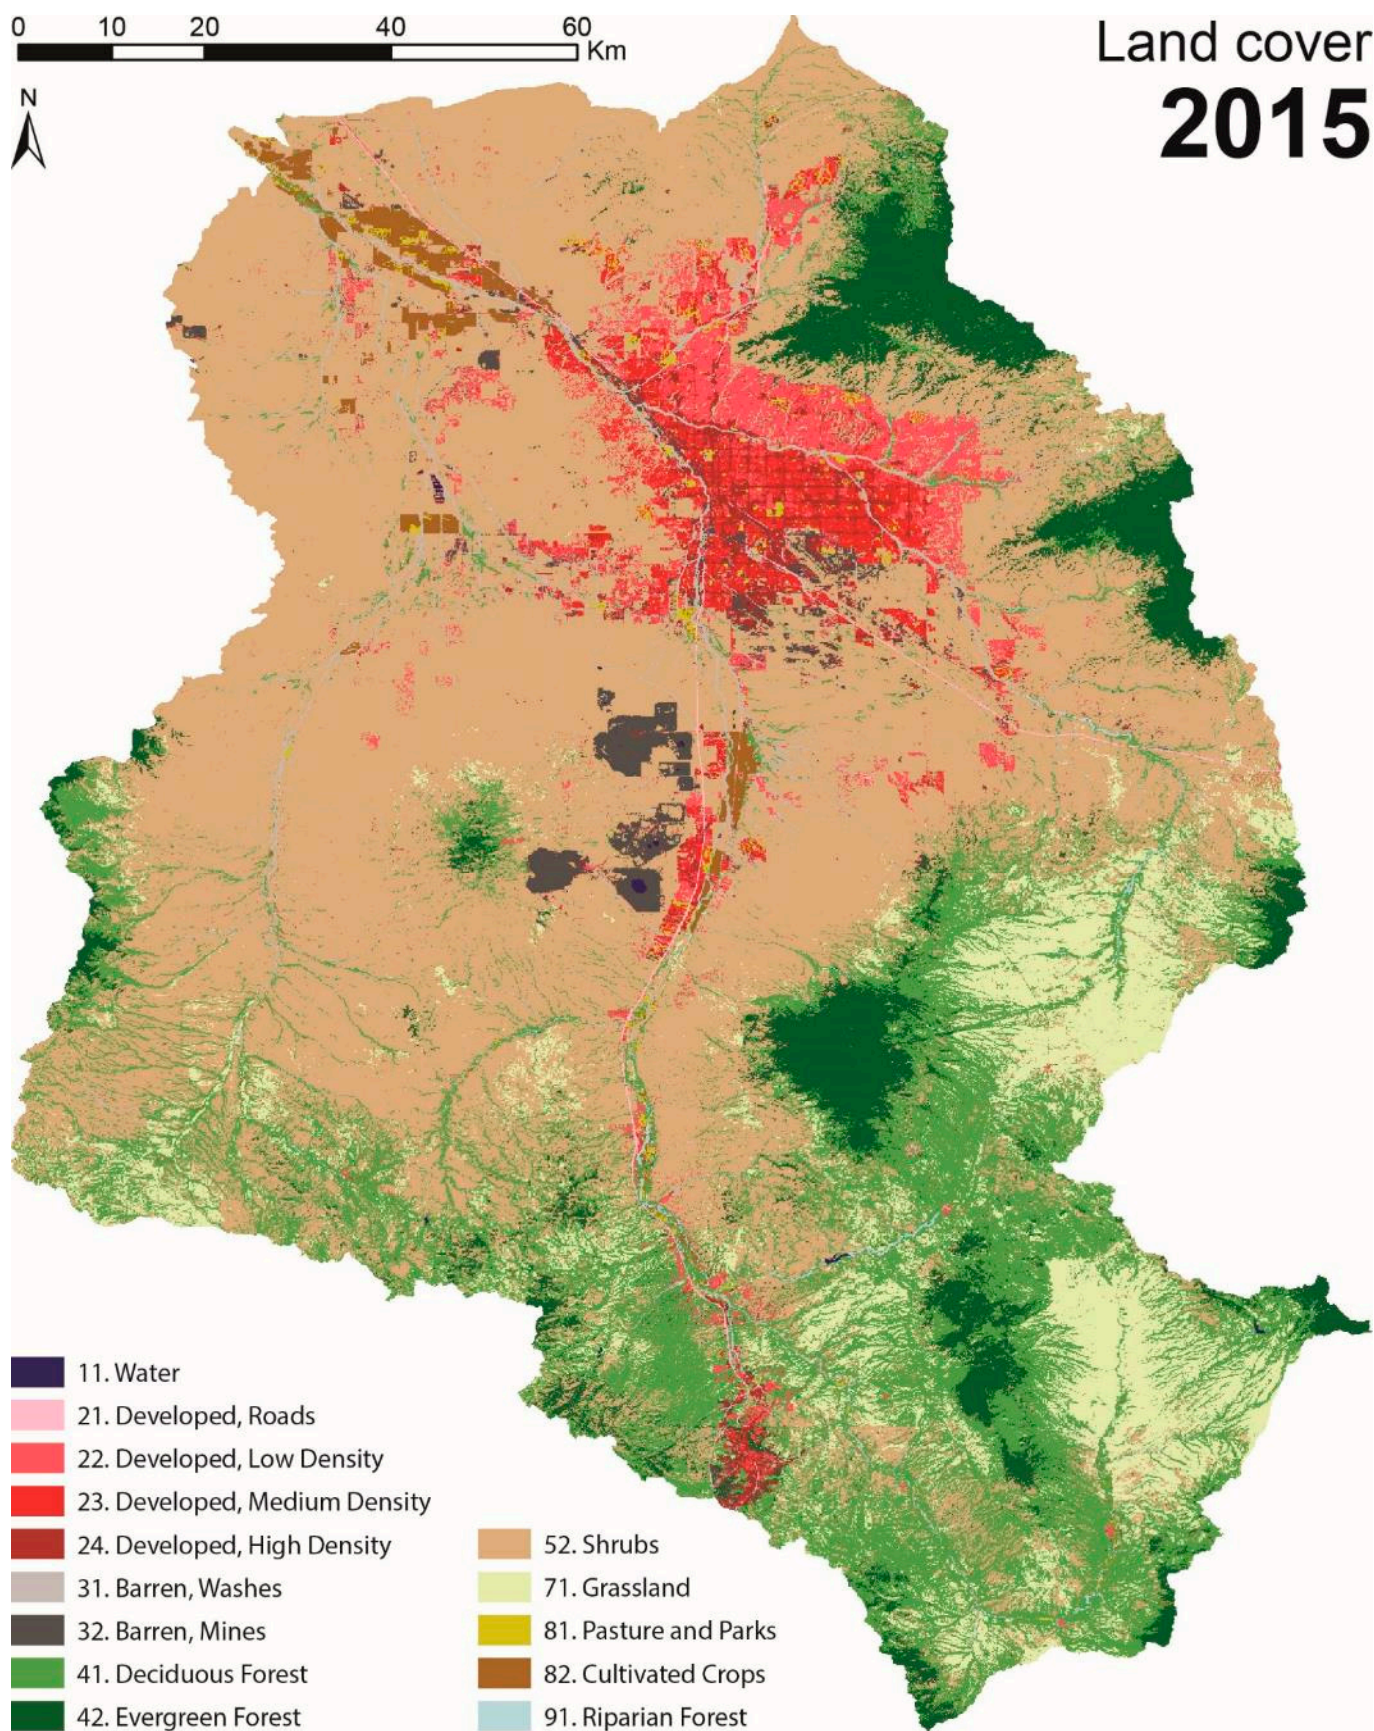



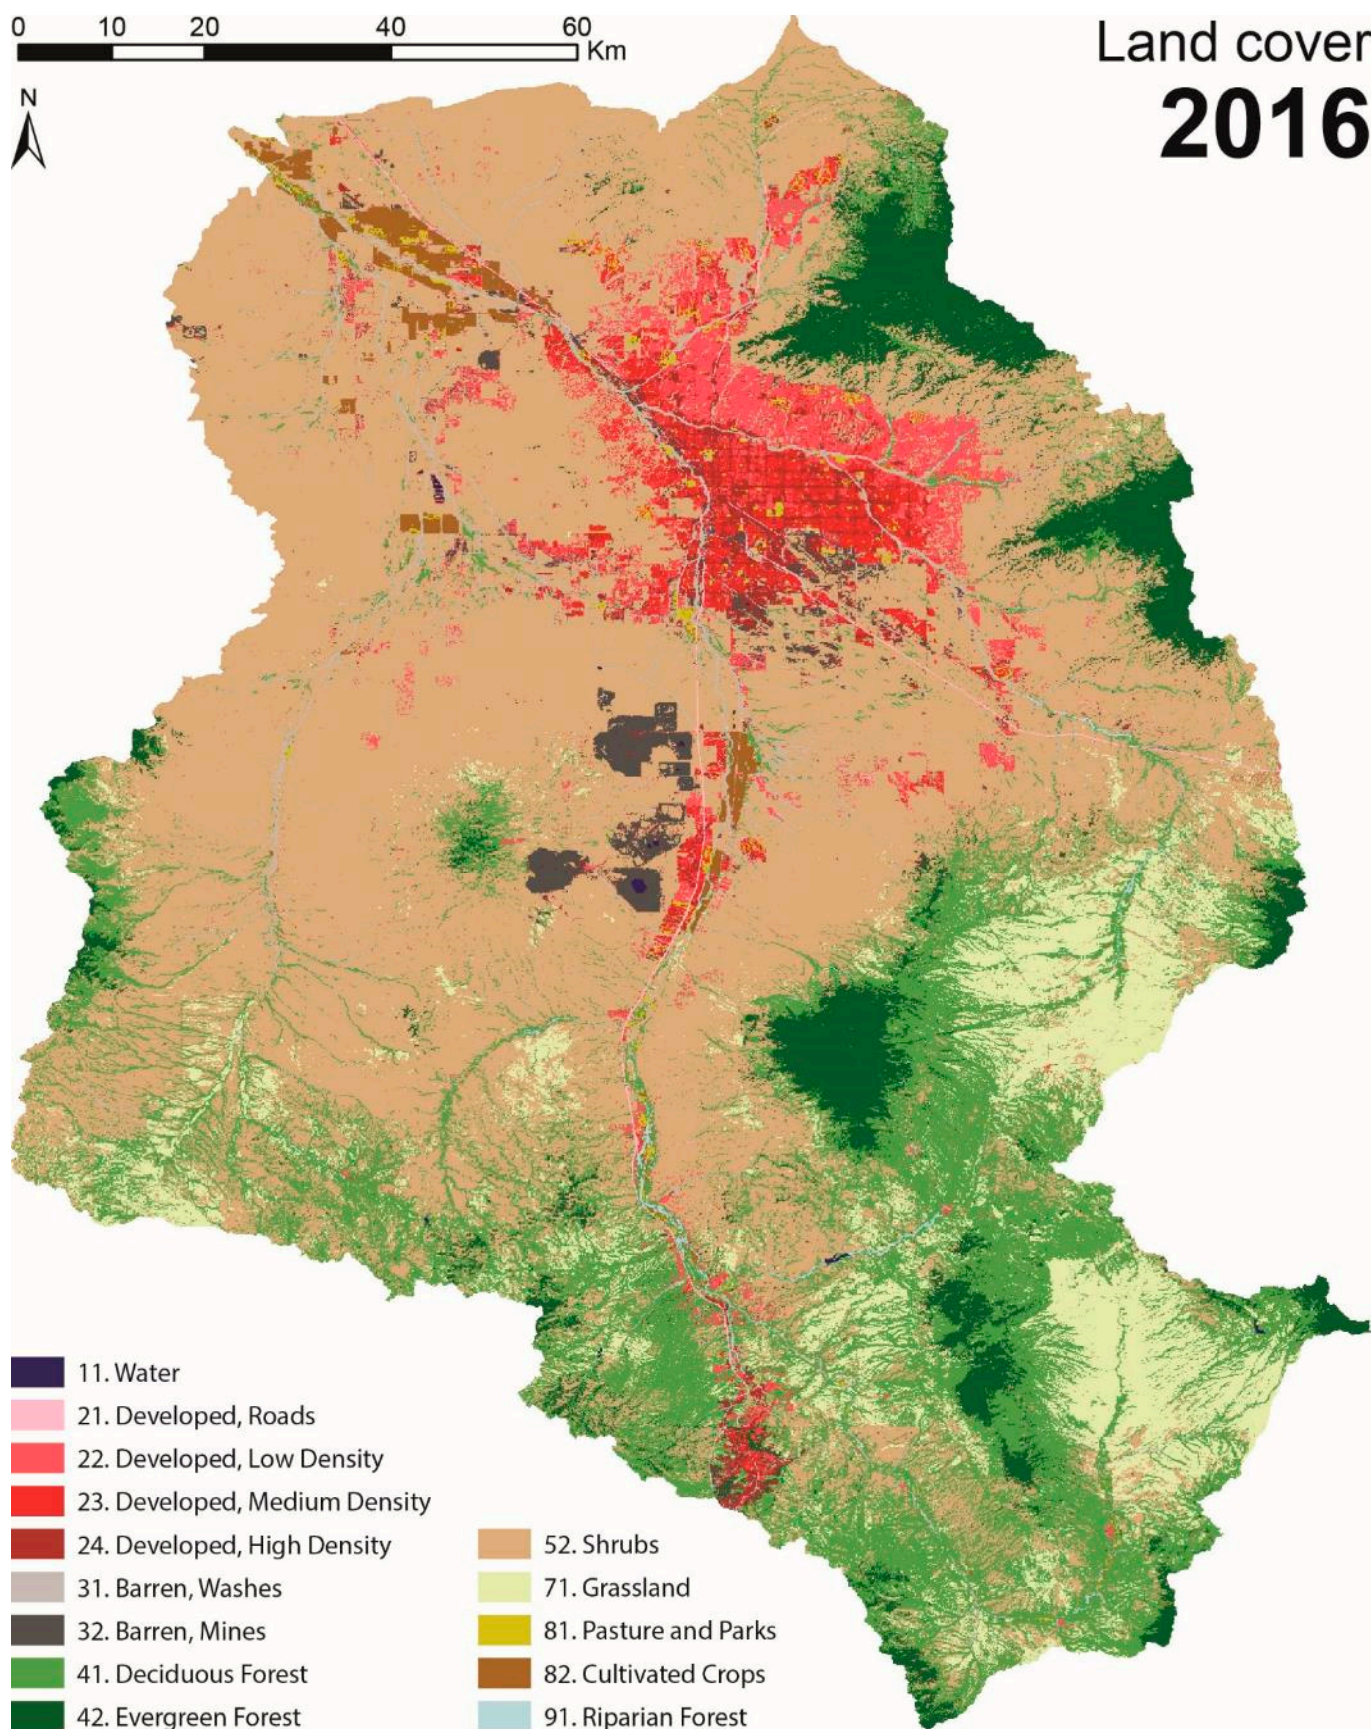



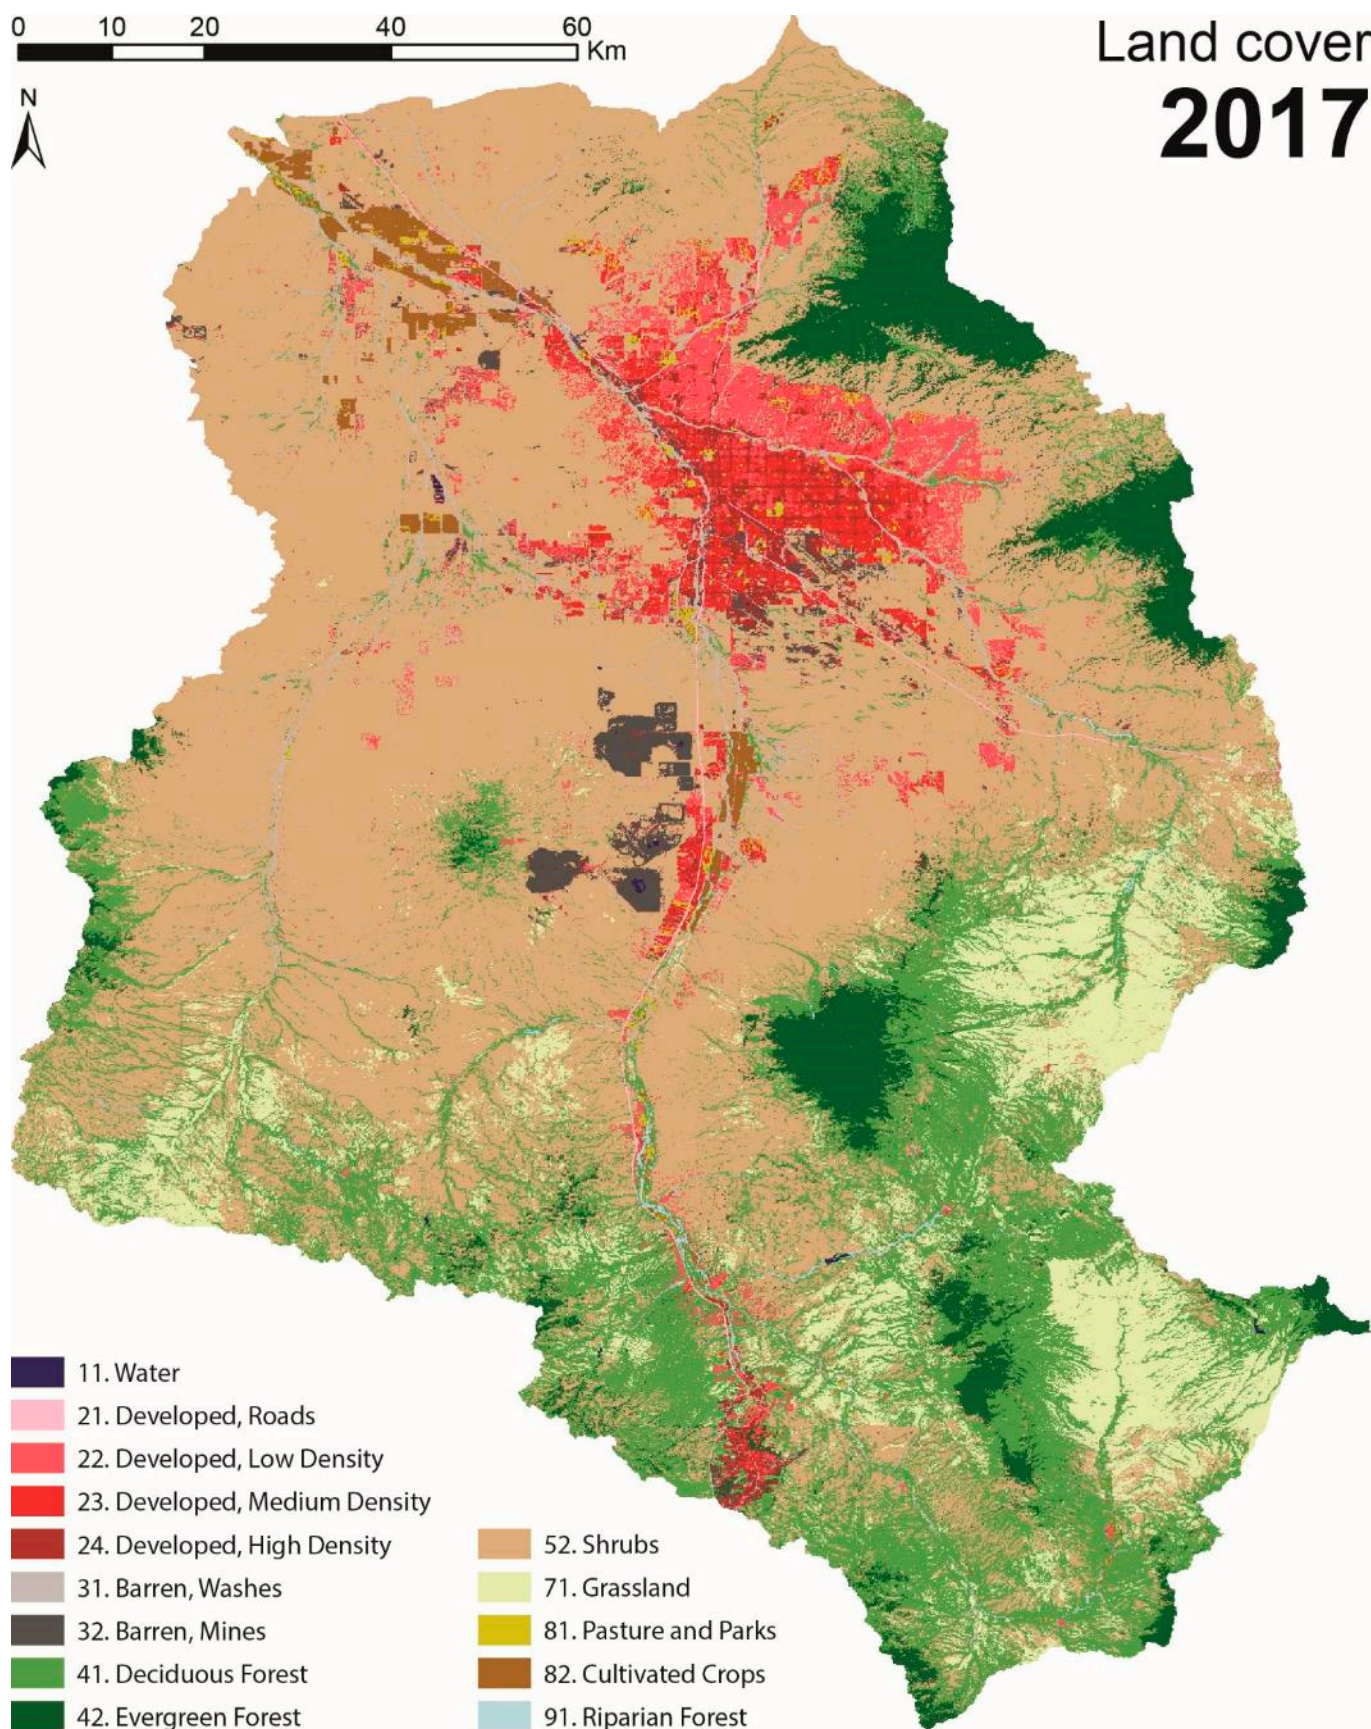



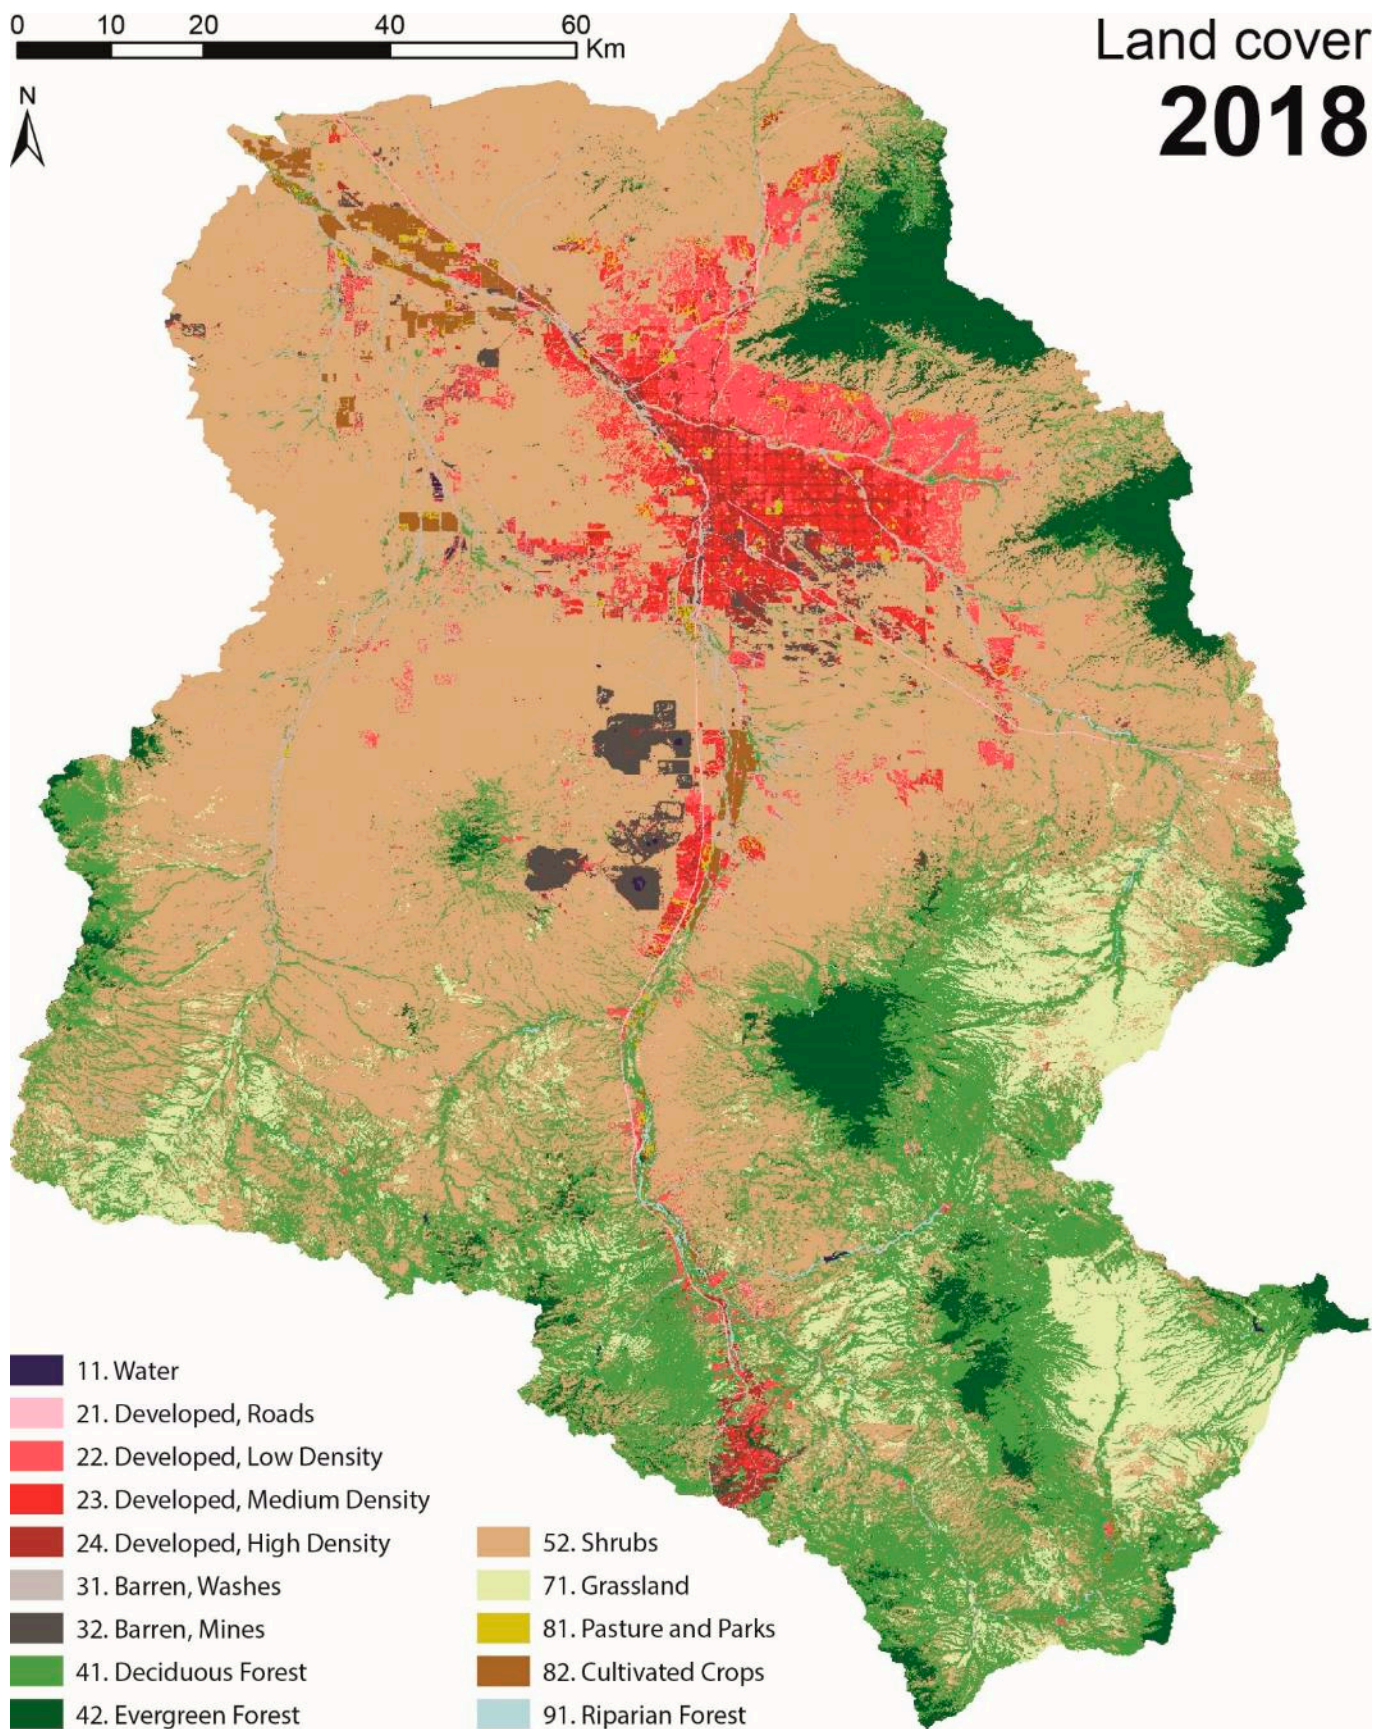



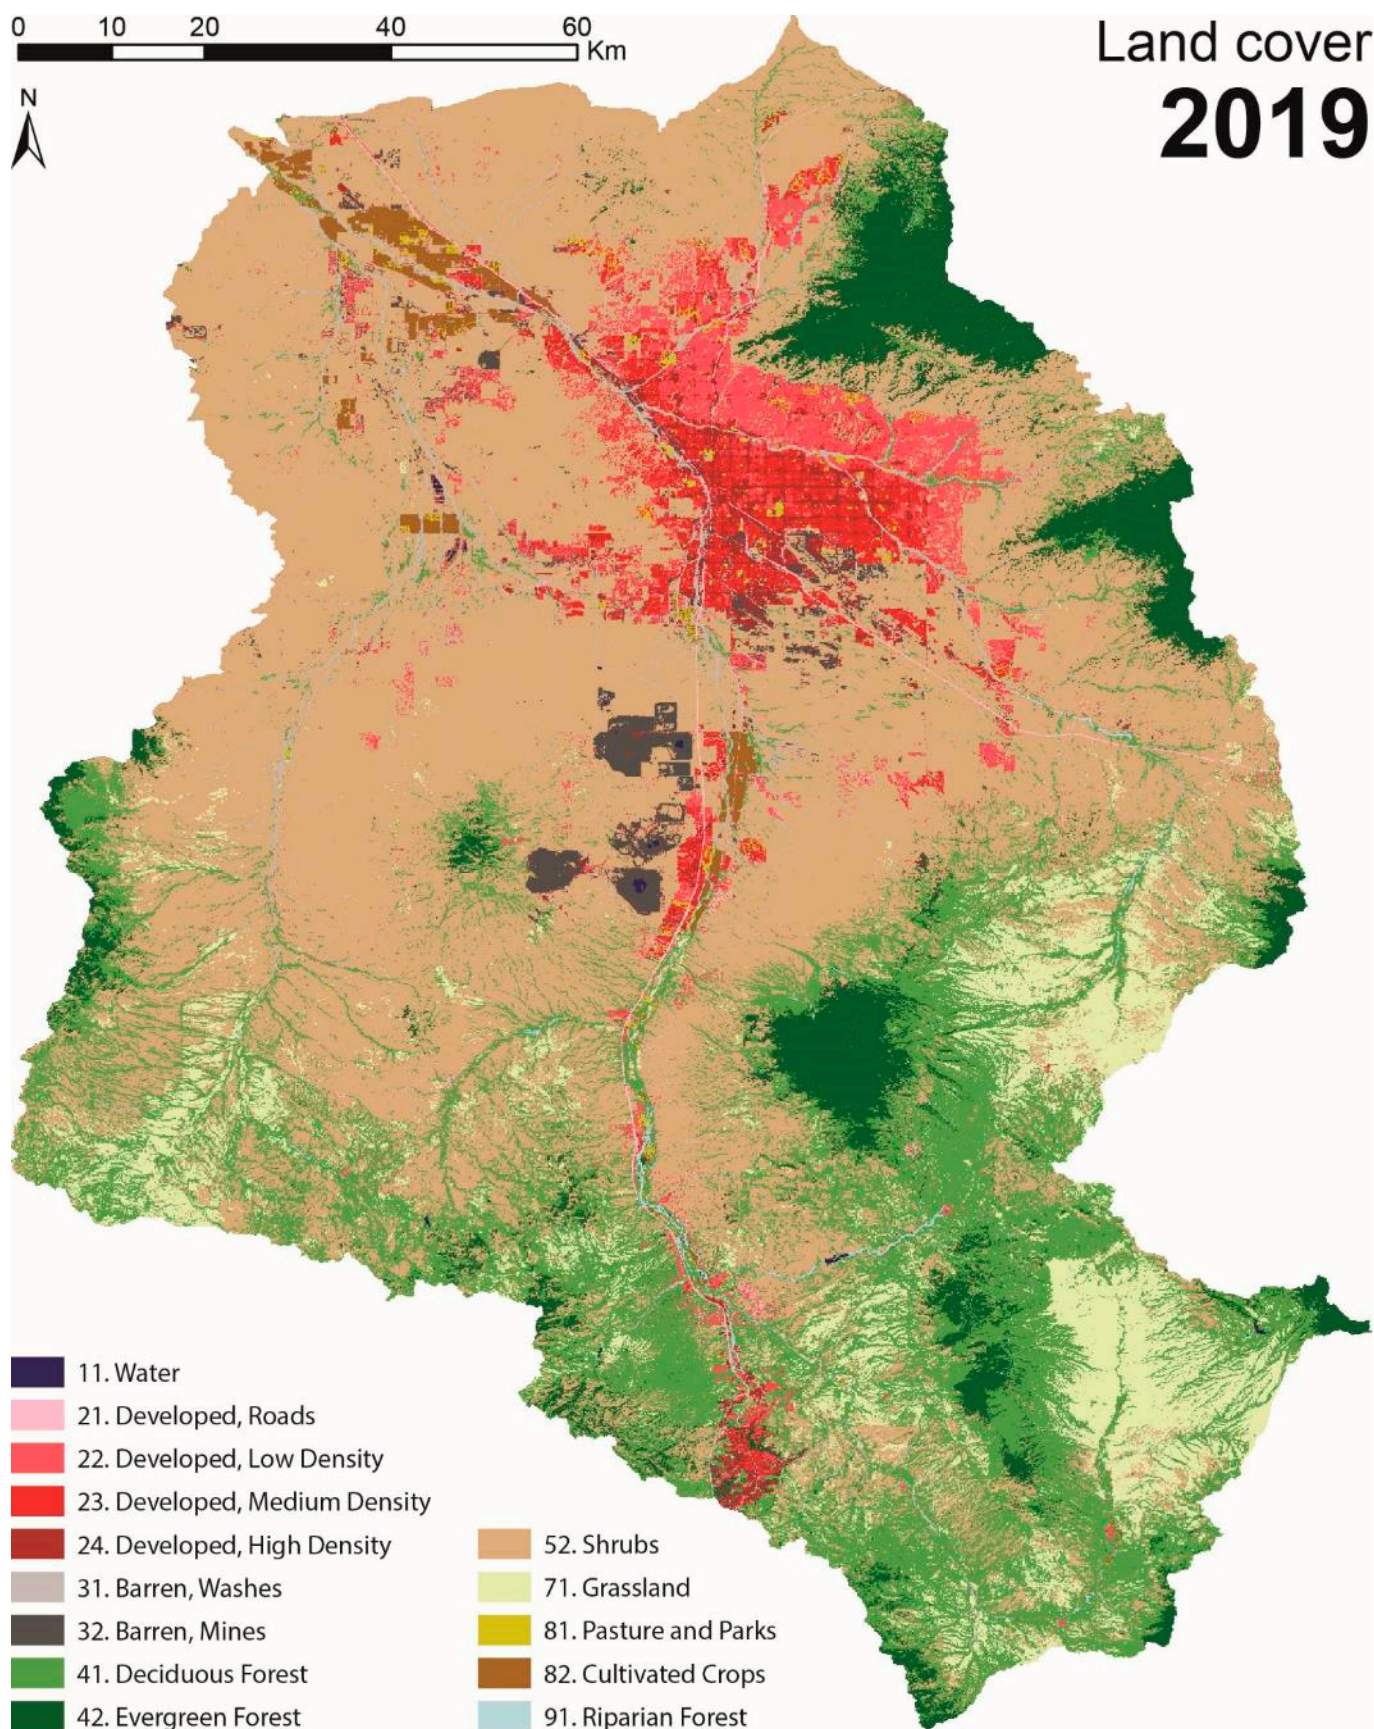



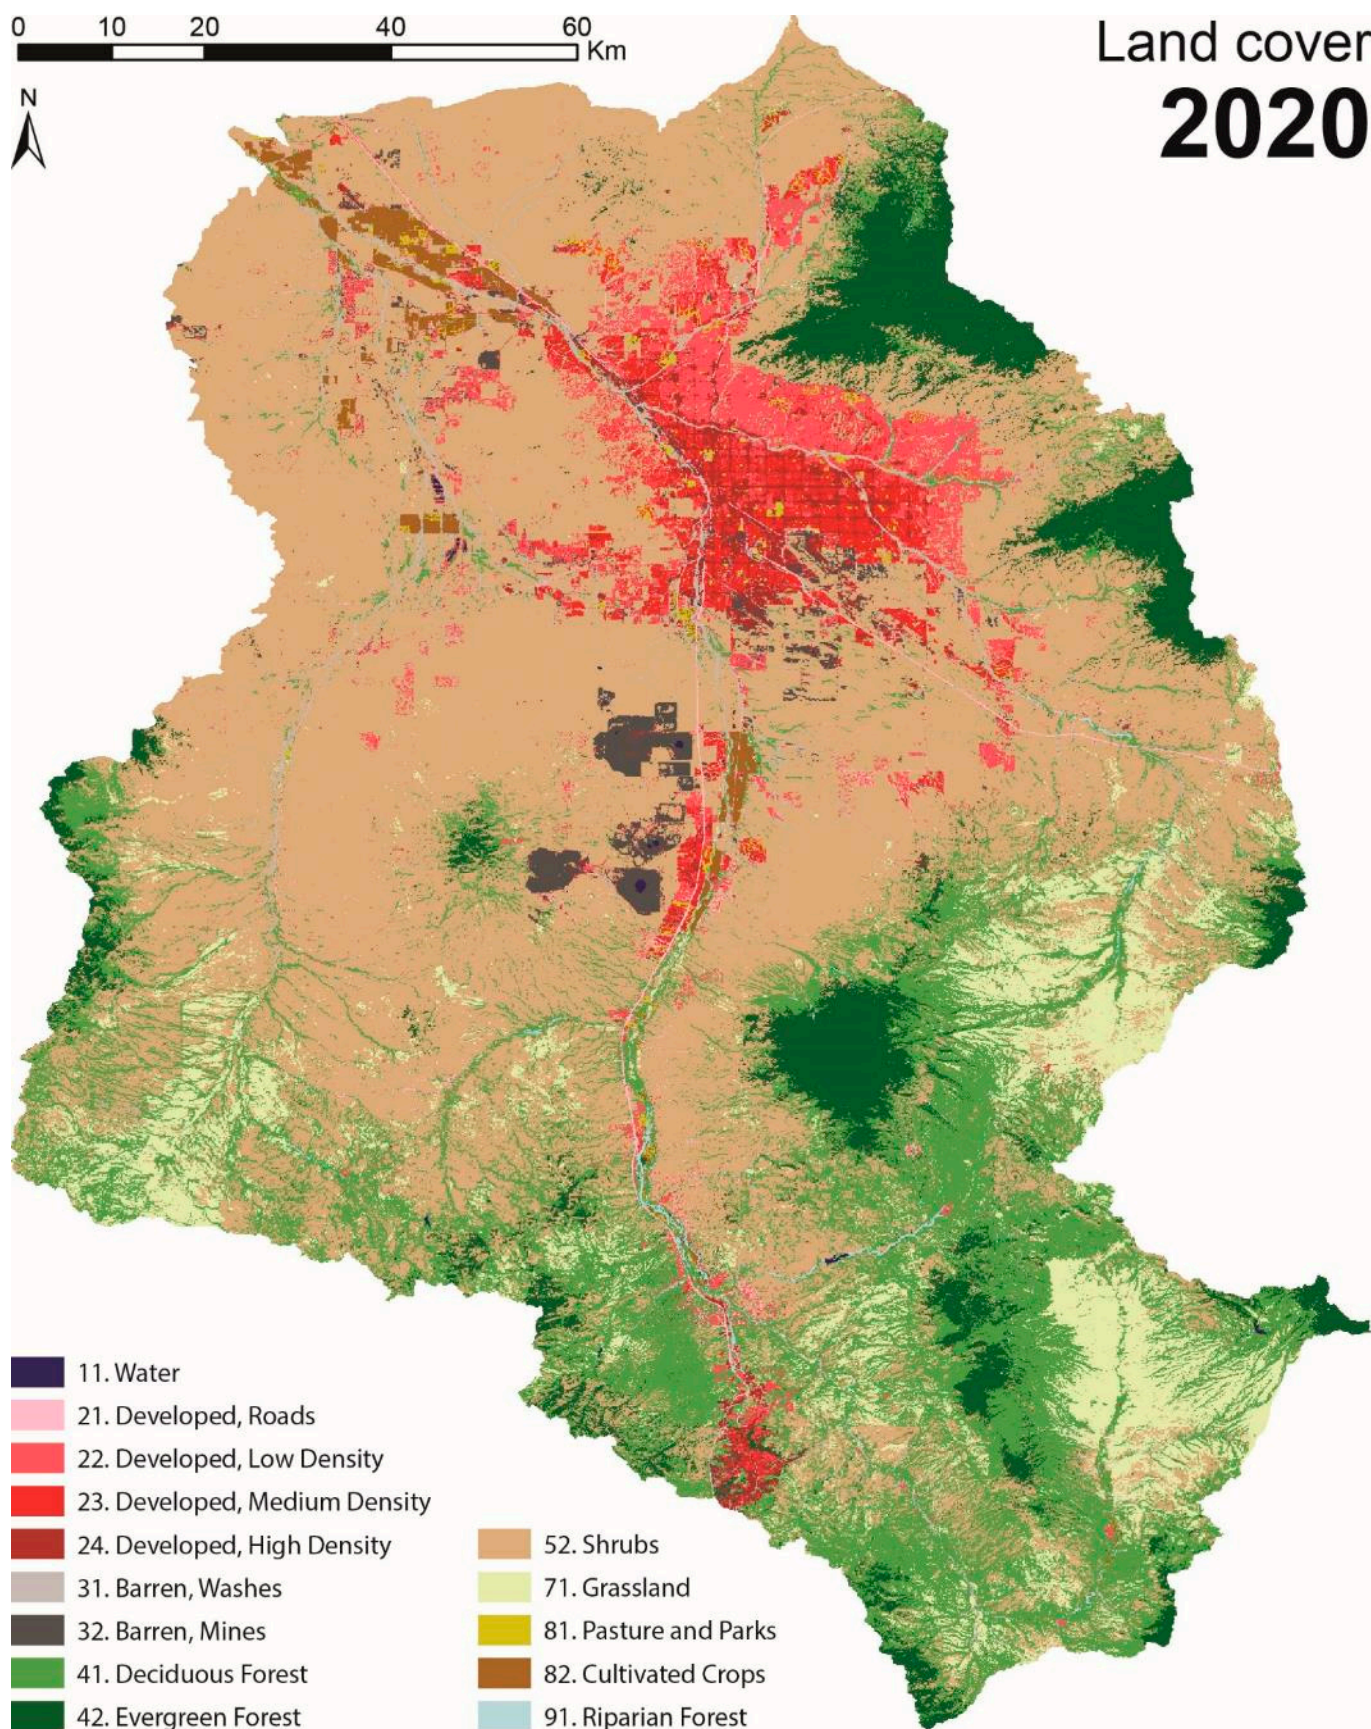

Supplement: s1 [file s1]
